1 **Identification and characterization of novel filament-forming proteins in**  
2 **cyanobacteria**

3

4 Benjamin L. Springstein<sup>1\*</sup>, Christian Woehle<sup>1‡</sup>, Julia Weissenbach<sup>1‡‡</sup>, Andreas O. Helbig<sup>2</sup>, Tal  
5 Dagan<sup>1</sup>, Karina Stucken<sup>3\*</sup>

6

7 <sup>1</sup> Institute of General Microbiology, Christian-Albrechts-Universität zu Kiel, Kiel, Germany

8 <sup>2</sup> Institute for Experimental Medicine, Christian-Albrechts-Universität zu Kiel, Kiel, Germany

9 <sup>3</sup> Department of Food Engineering, University of La Serena, La Serena, Chile.

10

11 ‡ Present address: Max Planck Institute for Plant Breeding Research, Max Planck-Genome-  
12 Center Cologne, Cologne, Germany

13 ‡‡ Present address: Faculty of Biology, Technion-Israel Institute of Technology, Haifa, 32000,  
14 Israel

15

16 \* Corresponding authors: BLS: [bspringstein@ifam.uni-kiel.de](mailto:bspringstein@ifam.uni-kiel.de); KS: [kstucken@userena.cl](mailto:kstucken@userena.cl)

## 17 **Abstract**

18 Filament-forming proteins in the bacterial cytoskeleton function in stabilization and localization  
19 of proteinaceous complexes and replicons. Research of the cyanobacterial cytoskeleton is  
20 focused on the bacterial tubulin (FtsZ) and actin (MreB). Nonetheless, the diverse colony  
21 morphologies and cell types in cyanobacteria suggest the presence of additional cytoskeletal  
22 proteins. Here we present two novel filament-forming proteins in cyanobacteria. Surveying  
23 cyanobacterial genomes for coiled-coil-rich proteins (CCRPs), we observed a higher  
24 proportion of CCRPs in filamentous cyanobacteria in comparison to unicellular cyanobacteria.  
25 We identified nine protein families with putative intermediate filament (IF) properties.  
26 Polymerization assays revealed four polymer-forming proteins *in vitro* and three polymer-  
27 forming proteins *in vivo*. Fm7001 from *Fischerella muscicola* PCC 7414 polymerized *in vitro*  
28 and formed filaments in different *in vivo* systems. Functional analysis of Fm7001 suggests that  
29 it has IF-like properties. Additionally, we identified a tetratricopeptide repeat protein, All4981 in  
30 *Anabaena* sp. PCC 7120 that polymerized into filaments *in vivo* and *in vitro*. All4981 interacts  
31 with other known cytoskeletal proteins and is indispensable for *Anabaena*. Our results expand  
32 the repertoire of known prokaryotic filament-forming CCRPs and demonstrate that  
33 cyanobacterial CCRPs are involved in cell morphology, motility, cytokinesis and colony  
34 integrity.

## 35 **Author Summary**

36 The phylum Cyanobacteria is characterized by a large morphological diversity, ranging from  
37 coccoid or rod-shaped unicellular species to complex filamentous multicellular species. Many  
38 species of multicellular cyanobacteria can undergo cell differentiation and changes in their cell  
39 shape. Despite this diversity, very few molecular mechanisms underlying the cyanobacterial  
40 morphological plasticity are known. Among these, the cytoskeletal proteins FtsZ and MreB are  
41 important regulators of cyanobacterial cell shape and viability. Also, the multicellular phenotype  
42 of filamentous cyanobacteria has been linked to prokaryotic gap-junction analogs, the septal  
43 junctions. The significance of our research is the identification and characterization of a novel

44 cyanobacterial cytoskeletal repertoire of IF-like proteins that will aid in the characterization of  
45 the morphological complexity of cyanobacteria. Thus, our survey leads to a broader  
46 understanding of the underlying principles of cyanobacterial morphotypes and will serve as a  
47 starting point for future research to further unravel the complex morphologies unique to this  
48 phylum.

## 49 **Introduction**

50 Species in the phylum Cyanobacteria present a wide morphological diversity, ranging from  
51 unicellular to multicellular organisms. Unicellular cyanobacteria of the *Synechocystis* and  
52 *Synechococcus* genera are characterized by a round or rod-shaped morphology, respectively,  
53 and many strains are motile. Species of the Nostocales order are multicellular and differentiate  
54 specialized cells, known as heterocysts, which fix atmospheric nitrogen under aerobic  
55 conditions. Within the Nostocales, species of the Nostocaceae (e.g., *Anabaena*, *Nostoc*) form  
56 linear filaments, while cells in the Hapalosiphonaceae and Chlorogloepsidaceae divide in more  
57 than one plane to form true-branching or multiseriate filaments (e.g. as in *Fischerella* or  
58 *Chlorogloeopsis*, respectively) (Rippka *et al.*, 1979). Notably, cells within a single filament  
59 (termed trichome) of a multicellular cyanobacterium can differ in size, form or cell wall  
60 composition (Rippka *et al.*, 1979). Cells in the *Anabaena* sp. PCC 7120 (hereafter *Anabaena*)  
61 trichome are linked by a shared peptidoglycan sheet and an outer membrane (Wilk *et al.*,  
62 2011). The cells communicate and exchange nutrients through intercellular cell-cell  
63 connections, called septal junctions, thought to be comprised of the septal junction proteins  
64 SepJ, FraC and FraD (reviewed by Herrero, Stavans and Flores, 2016). SepJ is essential for  
65 the multicellular phenotype in the heterocystous cyanobacterium *Anabaena* (Flores *et al.*,  
66 2007; Nayar *et al.*, 2007). Studies of the molecular basis of cyanobacterial morphogenesis  
67 have so far focused on the function of FtsZ and MreB, the prokaryotic homologs of tubulin and  
68 actin, respectively (Wagstaff and Löwe, 2018). FtsZ, which is organized in a multi-protein  
69 complex called the divisome, is a key regulator of cell division and septal peptidoglycan (PG)  
70 biogenesis (Bi and Lutkenhaus, 1991; Wagstaff and Löwe, 2018). In *Anabaena* and in the

71 coccoid cyanobacterium *Synechocystis* sp. PCC 6803 (*Synechocystis*), FtsZ is an essential  
72 cellular component (Zhang *et al.*, 1995). The FtsZ cellular concentration in *Anabaena* is tightly  
73 controlled by a so far undescribed protease (Lopes Pinto *et al.*, 2011). Apart from its function  
74 in cell division, the FtsZ-driven divisome also mediates the localization of SepJ (Ramos-León  
75 *et al.*, 2015). MreB, which similar to FtsZ is also organized in a multi-protein complex called  
76 the elongasome, is a key mediator of longitudinal PG biogenesis controlling cell shape (Jones,  
77 Carballido-López and Errington, 2001; Wagstaff and Löwe, 2018). In cyanobacteria, MreB has  
78 been shown to have a role in cell shape determination in *Anabaena*, nonetheless, it is  
79 dispensable for cell viability (Hu *et al.*, 2007). In contrast, MreB is essential in *Synechococcus*  
80 sp. PCC 7942 (*Synechococcus*) where partially segregated mutants display a coccoid  
81 morphology, resembling *E. coli mreB* deletion strains (Kruse, Bork-Jensen and Gerdes, 2005;  
82 Jain, Vijayan and O'Shea, 2012).

83 IF proteins exhibit an intrinsic nucleotide-independent polymerization capability *in vitro*  
84 that is mediated by the high frequency of coiled-coil-rich regions in their amino acid sequence  
85 (Shoeman and Traub, 1993; Fuchs and Weber, 1994; Löwe and Amos, 2009; Wagstaff and  
86 Löwe, 2018). Eukaryotic IF proteins are generally characterized by a conserved domain  
87 buildup consisting of discontinuous coiled-coil segments that form a central rod domain. This  
88 rod domain is N- and C-terminally flanked by globular head and tail domains of variable length  
89 (Fuchs and Weber, 1994; Herrmann *et al.*, 1996; Herrmann and Aebi, 2004). Crescentin, a  
90 bacterial IF-like CCRP from *Caulobacter crescentus*, exhibits a striking domain similarity to  
91 eukaryotic IF proteins. Crescentin filaments that align at the inner cell curvature are essential  
92 for the typical crescent-like cell shape of *C. crescentus*, possibly by locally exerting a  
93 constriction force which coordinates the MreB-driven peptidoglycan (PG) synthesis machinery  
94 (Ausmees, Kuhn and Jacobs-Wagner, 2003; Cabeen *et al.*, 2009; Charbon, Cabeen and  
95 Jacobs-Wagner, 2009). Reminiscent of eukaryotic IF proteins, crescentin was found to  
96 assemble into filamentous structures *in vitro* in a nucleotide-independent manner (Ausmees,  
97 Kuhn and Jacobs-Wagner, 2003). However, so far, no crescentin homologs have been found  
98 in other bacteria, indicating that non-spherical or rod-shaped prokaryotic morphologies are

99 putatively controlled by other cytoskeletal proteins of assumed IF-like origin (Bagchi *et al.*,  
100 2008; Wickstead and Gull, 2011). Apart from crescentin, many other coiled coil-rich proteins  
101 (CCRPs) with IF-like functions have been identified to polymerize into filamentous structures  
102 and to perform cytoskeletal roles, however, none of them resembled the eukaryotic IF domain  
103 architecture (reviewed by Lin & Thanbichler, 2013). Examples are two proteins from  
104 *Streptomyces coelicolor* whose function has been studied in more detail: FilP and Scy (Bagchi  
105 *et al.*, 2008; Walshaw, Gillespie and Kelemen, 2010; Holmes *et al.*, 2013). Gradients of FilP  
106 filaments localize at the tip of a growing hyphae and contribute to cellular stiffness (Bagchi *et*  
107 *al.*, 2008). Scy forms patchy clusters at the sites of novel tip-formation and, together with the  
108 scaffolding CCRP DivIVA, orchestrates polar hyphal growth (Holmes *et al.*, 2013). Together  
109 with FilP and a cellulose-synthase, these proteins form the polarisome, which guides  
110 peptidoglycan biogenesis and hyphal tip growth (Flärdh *et al.*, 2012; Hempel *et al.*, 2012;  
111 Holmes *et al.*, 2013). Another example are four CCRPs in the human pathogen *Helicobacter*  
112 *pylori*, which were found to assemble into filaments *in vitro* and *in vivo* and to determine the  
113 helical cell shape as well as cell motility (Waidner *et al.*, 2009; Specht *et al.*, 2011).  
114 Consequently, filament-forming CCRPs with cytoskeletal functions have been found in  
115 numerous prokaryotes with different cellular morphologies. The presence of intermediate  
116 filament (IF)-like proteins in the cyanobacterial cytoskeleton is so far understudied. Thus, here  
117 we search for IF-like CCRPs in cyanobacteria using a computational prediction of CCRPs and  
118 functionally characterize putative IF-like proteins by *in vitro* and *in vivo* assays in  
119 morphologically diverse cyanobacteria.

## 120 **Results**

### 121 **Coiled-coil rich proteins are widespread in cyanobacteria**

122 For the computational prediction of putative filament-forming proteins, we surveyed 364  
123 cyanobacterial genomes including 1,225,314 protein-coding sequences (CDSs). All CDSs in  
124 the cyanobacterial genomes were clustered by sequence similarity into families of  
125 homologous proteins (see Methods). The frequency of CCRPs in each CDS was calculated  
126 using the COILS algorithm (Lupas, Van Dyke and Stock, 1991). The algorithm yielded a list of  
127 28,737 CDSs with high coiled-coil content ( $\geq 80$  amino acids in coiled-coil conformation;  
128 Supplementary File 1). CCRPs were predicted in 158,466 protein families covering all  
129 cyanobacterial species. To examine the overall distribution of CCRPs in cyanobacterial  
130 genomes, we investigated 1,504 families of homologous proteins that include at least three  
131 CCRP members (Fig. 1). Notably, most protein families (1,142; 76%) include CCRP and non-  
132 CCRP members, indicating that IF-like properties might differ among homologous proteins.  
133 The presence/absence pattern of families including CCRPs further shows that those are less  
134 abundant in picocyanobacterial genomes (SynProCya group) in comparison to the remaining  
135 species in the phylum. Furthermore, the proportion of CCRPs in the genome is significantly  
136 higher in filamentous cyanobacteria in comparison to unicellular cyanobacteria ( $P=2.65 \times 10^{-46}$   
137 using Kruskal-Wallis test and Tukey test with  $\alpha=0.05$ ). This indicates that a high frequency of  
138 CCRPs is one of the characteristics of multicellular cyanobacteria.

139 For the experimental validation, the complete list of CCRPs was filtered to include  
140 candidates from freshwater unicellular and filamentous cyanobacteria that are amenable to  
141 genetic modification, including *Thermosynechococcus elongatus* BP-1  
142 (*Thermosynechococcus*), *Synechocystis*, *Synechococcus*, *Anabaena* and *Fischerella*  
143 *musciicola* PCC 7414 (*Fischerella*). The remaining CCRPs were further sorted to include  
144 proteins having similar properties to known prokaryotic IF-like proteins (e.g., crescentin, FilP)  
145 and are annotated as hypothetical proteins with an unknown function. An additional *Fischerella*  
146 CDS, Fm7001, was added to the list as earlier analyses suggested that it has a cell shape-

147 determining function. The preliminary filtration resulted in a list of nine candidates, which we  
148 investigated experimentally here (Fig. 1 and Supplementary Fig. 1 and Supplementary Table  
149 1). Candidate coding sequences vary in size and range from ca. 280 amino acids  
150 (Synpcc7942\_2039, abbreviated Syc2039) to ca. 650 amino acids (All4981). The coiled-coil  
151 domain distribution is variable among the candidates in both coiled-coil domain count and  
152 length. The presence of homologs across all cyanobacterial morphotypes serves as a hint for  
153 universal protein function while a restricted distribution in specific subsections or morphotypes  
154 indicates a functional specialization within the respective taxon. An example for such species-  
155 specific candidate in our list is *slr7083* that is encoded on the pSYSA toxin-antitoxin plasmid  
156 in *Synechocystis*, similarly to *parM* and *tubZ*, which mediate plasmid segregation (Larsen *et al.*,  
157 *et al.*, 2007; Bharat *et al.*, 2015). In contrast, the homologous proteins Synpcc7942\_1139  
158 (abbreviated Syc1139) and Slr1301 are highly conserved and have homologous proteins  
159 among all cyanobacterial groups (Fig. 1), including CypS from *Anabaena* (Springstein *et al.*,  
160 2019). Slr1301 was also previously identified to be involved in *Synechocystis* twitching motility  
161 in a transposon mutant library (Bhaya *et al.*, 2001).

## 162 **Cyanobacterial CCRPs assemble into diverse filamentous structures *in vitro***

163 A major characteristic of filament-forming proteins is their ability to self-polymerize into  
164 filaments intra and extra-cellularly (Fuchs and Weber, 1994; Köster *et al.*, 2015). Unlike actin  
165 and tubulin, IFs are able to form filamentous structures *in vitro* in a nucleotide-independent  
166 manner without additional co-factors upon renaturation from a denaturing buffer (Herrmann  
167 and Aebi, 2000; Köster *et al.*, 2015). To examine the self-polymerization property of the nine  
168 CCRPs, we purified His<sub>6</sub>-tagged CCRPs under denaturing conditions and subjected them to  
169 subsequent renaturation. When applicable, the purified proteins were labeled with NHS-  
170 Fluorescein and the formation of *in vitro* filaments was assessed by epifluorescence or bright  
171 field microscopy. Several candidates did not form discernible structures *in vitro* and were  
172 consequently excluded from further investigation (including Slr6096, Tlr0420 and Fm6009,  
173 Supplementary Fig. 2). The remaining CCRPs assembled *in vitro* into highly diverse structures

174 (Fig. 2), ranging from large two-dimensional sheet-like filaments (Fm7001) to low abundant  
175 small strings (Slr1301). Direct dialysis of Fm7001 from a high urea-containing buffer to a  
176 physiological buffer led to protein precipitation. However, upon slow stepwise renaturation  
177 (removing 0.5 M every 2 h), Fm7001 polymerized into a flat two-dimensional sheet floating on  
178 top of the dialysate in 4,5 M urea (Supplementary Fig. 3A). We addressed the eventuality that  
179 these structures could be the product of crystalized urea, but control experiments did not reveal  
180 filaments Self-polymerization of Fm7001 revealed two-dimensional filamentous sheets as well  
181 as single filamentous fibers (Fig. 2). Similar structures were observed for purified Fm7001-  
182 GFP and MBP-Fm7001-His<sub>6</sub> (Supplementary Fig 3B,C). A two-dimensional filamentation  
183 pattern was observed also for Slr7083, which formed single, long and straight filamentous  
184 strings that were interconnected by two-dimensional sheets, thereby producing a honeycomb-  
185 like structure (Fig. 2). All4981 assembled into an interconnected filamentous net with thin single  
186 filaments (Fig. 2). The heterologous expression of Syc2039-His<sub>6</sub> in *E. coli* failed, but we  
187 successfully purified Syc2039-GFP-His<sub>6</sub> from *Synechococcus* instead. The polymerization  
188 pattern of Syc2039 revealed sphere or cell-shape-like three-dimensional sheets (Fig. 2).  
189 However, we note that most of the protein precipitated upon renaturation. The polymerization  
190 of Syc1139 revealed similar cell-shape-like three-dimensional sheets but without detectable  
191 aggregates (Fig. 2). The resemblance between Syc2039 and Syc1139 sheets raised the  
192 possibility that the sheet-like structures observed in the Syc2039-GFP-His<sub>6</sub> sample represents  
193 co-precipitated and polymerized Syc1139. Supporting this, we identified direct interactions of  
194 Syc1139 and Syc2039 using the bacterial adenylate cyclase two-hybrid (BACTH) assays  
195 (Supplementary Fig. 4). For Slr1301, only minor, if at all filamentous-like structures were  
196 observed (Fig. 2). Nonetheless, we included this protein in further analyses since its homolog  
197 in *Anabaena* (CypS) has been recently reported as a filament-forming protein (Springstein *et*  
198 *al.*, 2019). Notably, crescentin, which we used as a positive control, polymerized into smooth  
199 and filigree filaments only in the presence of monovalent ions (i.e. NaCl; Supplementary Fig.  
200 2A,B). The maltose binding protein (MBP), which served as a negative control, did not  
201 assemble into filamentous structures *in vitro* (Supplementary Fig. 2A). This observation



202 highlights the importance of suitable buffer conditions for polymerization assays of filament-  
203 forming proteins.

204 To further inspect the self-assembly capacity of the six CCRPs, we evaluated the self-  
205 association properties of the CCRPs using the BACTH assay (Supplementary Fig. 5). Despite  
206 its unclear *in vitro* polymerization, Syc2039 and Slr1301 were able to self-interact in the BACTH  
207 system, thus we cannot rule out that optimal buffer conditions for *in vitro* polymerization are  
208 yet to be found. The identified self-binding properties of the cyanobacterial CCRPs provide  
209 further support for the *in vitro* polymerization results, thereby demonstrating a major hallmark  
210 of filament-forming proteins: their ability to polymerize *in vitro*.

### 211 **Putative filament-forming proteins form filaments *in vivo***

212 To investigate whether the genetic background influences the filamentation properties of the  
213 candidate proteins, we expressed GFP or YFP translational fusion constructs of the putative  
214 filament-forming CCRPs in multiple hosts: 1) *E. coli*, 2) their native cyanobacterium and 3) in  
215 cyanobacteria of a different morphotype or subsection. Gene expression was driven by  
216 inducible or constitutive promoters commonly used in cyanobacteria. These included P<sub>cpc560</sub>  
217 (for *Synechocystis*) (Zhou *et al.*, 2014), P<sub>trc</sub> (for *E. coli*, *Synechocystis* and *Synechococcus*)  
218 (Huang *et al.*, 2010) or P<sub>petE</sub> (for *Anabaena* and *Fischerella*) (Buikema and Haselkorn, 2001).  
219 As a positive control for the validation of *in vivo* filamentation, we expressed crescentin-GFP  
220 in *Anabaena*, which formed round and helical filaments that seemingly traversed through cell-  
221 cell connections of neighboring cells (Fig. 3A). However, we note that we cannot exclude that  
222 neighboring cells have not yet fully segregated due to the limited resolution of fluorescence  
223 microscopy.

## 224 **Fm7001 forms filaments *in vivo* independent of the heterologous host**

225 The *in vivo* localization of Fm7001 was inevitably linked to the tag orientation. Only N-terminal  
226 YFP fusions of Fm7001 resulted in filamentous structures (Fig. 3 and Supplementary Fig. 6).  
227 In *Synechocystis*, YFP-Fm7001 formed filaments throughout the cell (Fig. 3B) while in  
228 *Anabaena* we observed abundant single filamentous strings (Fig. 3C). In *Fischerella*, YFP-  
229 Fm7001 only rarely assembled into short filamentous strings (Fig. 3D inlay). Despite of the low  
230 abundance of filaments, heterologous expression of YFP-Fm7001 induced a swollen  
231 phenotype and the formation of *Fischerella* cell filaments that seemingly divided in more than  
232 one plane (resembling the multiseriate *Chlorogloeopsis fritschii* PCC 6912 phenotype). This  
233 effect suggests a contribution of Fm7001 in cell-size control in the true-branching phenotype  
234 of *Fischerella*, reminiscent of crescentin or CtpS, (Woldemeskel and Goley, 2017). Attempts  
235 to generate a  $\Delta fm7001$  mutant strain remained unsuccessful. We note that we cannot rule out  
236 the possibility that Fm7001 is indispensable for cell growth since *fm7001* is expressed in young  
237 (about 1 week old) *Fischerella* cultures, independent of the availability of fixed nitrogen sources  
238 in the growth medium (Supplementary Fig. 7). Additionally, *fm7001* is constantly highly  
239 expressed (Koch *et al.*, 2017), suggesting that it has an essential function. Taken together,  
240 Fm7001 has the capacity to form filaments *in vitro* and *in vivo* and displays morphogenic  
241 properties.

## 242 **Slr7083 and Slr1301 are involved in twitching motility in *Synechocystis***

243 To test for a role of Slr7083 and Slr1301 in cellular integrity, we first examined the expression  
244 pattern of both genes in *Synechocystis* cultures at different growth phases. Reverse  
245 transcription PCR showed that the transcription of *slr7083* was restricted to cultures growing  
246 in mid-exponential phase whereas *slr1301* was absent from early phase exponential cultures  
247 but readily expressed at later exponential stages (Supplementary Fig. 8). The expression of  
248 Slr7083-GFP in *Synechocystis* was localized to the cell periphery as well as rare focal spots  
249 and S-shaped filaments (Fig. 4A). Our attempts to express Slr7083-GFP in the motile

250 *Synechocystis* PCC-M substrain (hereafter PCC-M) failed to yield exconjugants, raising the  
251 possibility that Slr7083 may be involved in *Synechocystis* twitching motility.

252 The expression of Slr1301-YFP in the motile and non-motile *Synechocystis* strains  
253 revealed peripheral plug formation at indistinct sites, assembly into crescent shapes and rarely  
254 the formation of S-shaped filaments (Fig. 4A and Supplementary Fig. 9B). Similar structures  
255 have been previously reported for the pilus ATPase PilB (Schuergers *et al.*, 2015). Slr7083-  
256 GFP and YFP-Slr7083 localized to the cell periphery in *Anabaena* (Supplementary Fig. 10). In  
257 *E. coli*, Slr7083-GFP localized next to the cell poles (Supplementary Fig. 9A). Consequently,  
258 we conclude that the membrane circumvention of Slr7083 observed in *Anabaena* and  
259 *Synechocystis* might be the result of cyanobacterial-specific mechanisms that recruit Slr7083  
260 to the cell periphery. When expressed in *E. coli*, Slr1301-GFP revealed similar polar plugs  
261 (Supplementary Fig. 9A). Additionally, reminiscent of Slr7083, Slr1301-YFP influenced  
262 *Anabaena* cell-shape where it formed plugs but also single filaments or thick filamentous  
263 bundles that seemingly traversed through several cells (Supplementary Fig. 9B). To further  
264 assess the role of Slr1301 and Slr7083 in *Synechocystis* motility, we generated *Synechocystis*  
265 and PCC-M  $\Delta slr7083$  and  $\Delta slr1301$  mutant strains. The *Synechocystis*  $\Delta slr7083$  and  $\Delta slr1301$   
266 mutants revealed no phenotypic defects compared to the WT (Fig. 4B, Supplementary Fig.  
267 12). In contrast, the PCC-M  $\Delta slr7083$  mutant is characterized by a decrease in twitching motility  
268 and a defect in cytokinesis (Fig. 4B). Similarly, the PCC-M  $\Delta slr1301$  mutant entirely lost its  
269 twitching motility (Fig. 4B; confirming previous results from Bhaya, Takahashi, Shahi, & Arthur  
270 (2001)). Attempts to complement the motility defect in the PCC-M  $\Delta slr1301$  mutant by  
271 expressing Slr1301-YFP from the conjugation plasmid pRL153 failed, possibly as a result of  
272 the comparably high expression from the  $P_{trc}$ . Likewise, complementation attempts of the PCC-  
273 M  $\Delta slr7083$  mutant never resulted in exconjugants, while control experiments with a plasmid  
274 carrying only the sites for double homologous recombination lead to numerous exconjugants.  
275 In order to further explore how Slr1301 affects motility, we further analyzed co-precipitated  
276 proteins of Slr1301-YFP expressed in *Synechocystis* by mass spectrometry (Supplementary

277 Fig. 11B). This revealed multiple putative interaction partners involved in motility, including a  
278 twitching motility protein (Slr0161), two methyl-accepting chemotaxis proteins (McpA and PilJ)  
279 and the type IV pilus assembly ATPase PilB (Fig. 4C). The interaction of Slr1301 with PilB,  
280 together with their similar *in vivo* localization, prompted us to characterize the interaction of  
281 both proteins. For this purpose, we attempted to express PilB-GFP in *Synechocystis* WT, and  
282 in the  $\Delta slr1301$  and  $\Delta slr7083$  mutants. In *Synechocystis* WT, PilB-GFP localized to the cell  
283 periphery and often formed crescent-like formations (reminiscent of Slr1301-YFP and Slr7083-  
284 GFP; Fig. 4A), confirming previous results by Schuergers *et al.* (2015). However, we never  
285 observed any PilB-GFP expression in the  $\Delta slr7083$  and  $\Delta slr1301$  mutants. The similarity  
286 between our observations so far for Slr1301 and Slr7083 prompted us to test for an interaction  
287 between these two proteins. Indeed, a bacterial two-hybrid assay confirmed a direct interaction  
288 between Slr7083 and Slr1301 (Fig. 4D). Taken together, our investigation identified two  
289 *Synechocystis* CCRPs that are involved in cell motility. Slr7083 is a cell envelope-localized  
290 protein involved in cytokinesis and motility. It polymerized into filaments *in vitro* but only few  
291 filaments were identified *in vivo*, thus it is possible that Slr7083 is a novel cyanobacterial  
292 filament-forming CCRP. Slr1301, although failing to assemble into filaments *in vitro*,  
293 occasionally polymerized into filaments *in vivo* and was shown to be a direct interaction partner  
294 of proteins that function in twitching motility.

### 295 **All4981 is a *Anabaena* TPR protein that forms septal-arising filaments**

296 The expression of All4981-GFP in *Anabaena* revealed numerous filaments that traversed the  
297 cell while in other cells, All4981-GFP was associated with the cell septa (Fig. 5A). The filaments  
298 also occasionally spread in a star-like pattern into the cytosol. Additionally, in freshly ruptured  
299 All4981-GFP-expressing cells, filamentous *ex vivo* structures assembled in the medium into a  
300 higher order and strongly interconnected network (Supplementary Fig. 13A), resembling the *in*  
301 *vitro* polymerization pattern of All4981 (Fig 2). We confirmed the *in vivo* polymerization capacity  
302 of All4981 by expressing All4981-GFP in *Synechocystis*, which lacks homologs to that protein  
303 (Fig. 5B). Intrigued by the septal localization, we tested for an interaction with SepJ, a septal

304 junction protein in *Anabaena* (Flores *et al.*, 2007) and found weak, albeit significant physical  
305 interactions (Supplementary Fig. 13B). In addition, bacterial two-hybrid assays revealed that  
306 All4981 interacted with two other *Anabaena* filament-forming CCRPs, namely LfiA and LfiB  
307 (Springstein *et al.*, 2019), and strongly interacts with MreB (Supplementary Fig. 13B). Notably,  
308 MreB has previously been shown to form similar filamentous structures in *Anabaena* (Hu *et*  
309 *al.*, 2007). However, in contrast to genes in the *mreBCD* operon, whose overexpression  
310 induces cell abnormalities (Hu *et al.*, 2007), no direct morphogenic influence was detected for  
311 All4981 in *Anabaena*. Noteworthy, it is likely that All4981 is an essential protein in *Anabaena*  
312 as we were not able to generate an *all4981* deletion strain. Initially, we created a YFP-All4981  
313 fusion construct with a deletion of 240 bp between nt 735 and nt 975 of the *all4981* CDS,  
314 resulting in a deletion of the third and fourth TPR (YFP-All4981<sup>ΔTPR3-4</sup>) leaving the remaining  
315 ORF intact. Remarkably, this fusion protein, like All4981-GFP, formed cell-traversing filaments  
316 in *Anabaena* and sometimes assembled into a filamentous structure within the cells  
317 (Supplementary Fig. 13C). In contrast, YFP-All4981 localized to the septa between two  
318 neighboring cells but also revealed indistinct cytosolic localization (Supplementary Fig. 13C).  
319 Co-immunoprecipitation experiments following LC-MS/MS analytics from *Anabaena* WT  
320 expressing YFP-All4981<sup>ΔTPR3-4</sup> revealed an association of YFP-All4981<sup>ΔTPR3-4</sup> with ParB, MinD  
321 and MreB (Fig. 5C). Thus, All4981 might be involved in ParA/B/S-driven plasmid or  
322 chromosome segregation. The interaction with MreB agrees with the *in vivo* localization of  
323 YFP- All4981<sup>ΔTPR3-4</sup> in *Anabaena* (Supplementary Fig.13C) and the results from the bacterial  
324 two-hybrid assay (Supplementary Fig. 13B). Further significant interactions were found with a  
325 variety of putative S-layer and prohibitin-like proteins and with DevH, an essential protein for  
326 heterocyst glycolipid layer synthesis. Notably, we never observed any All4981 localization  
327 within heterocysts, regardless of the fluorescence tag. All4981 also interacted with All4982, a  
328 protein encoded directly upstream of *all4981*, but not with All4983, which is encoded directly  
329 upstream of *all4982* (Supplementary Fig. 14). To further examine the association between  
330 All4981, All4982 and All4983, we tested for a common transcript (i.e. an operon structure) and  
331 identified operon structures of *all4981* with *all4982* and likely also with *all4983* (Supplementary

332 Fig. 15). Inspired by the interaction with All4982, we expressed All4982-eCFP in *Anabaena*  
333 WT but could not observe any coherent structures. Overall, our results demonstrate that  
334 All4981 is connected to other *Anabaena* filament-forming CCRPs, the MreB cytoskeleton, the  
335 septal junctions and the protective S-layer. Additionally, All4981 polymerizes *in vitro*, *in vivo*  
336 and *ex vivo*, is likely essential for *Anabaena* and is thus accordingly classified as a  
337 cyanobacterial filament-forming TPR-repeat protein.

### 338 ***Synechococcus* CCRPs are involved in cytokinesis and colony integrity**

339 To test for a role of *syc2039* and *syc1139* in cellular integrity, we examined the expression  
340 pattern of both proteins in *Synechococcus* during cell growth. RT-PCR showed that *syc2039*  
341 and *syc1139* are primarily transcribed in late exponential phase but not in early exponential  
342 phase (Supplementary Fig. 16). *In vivo* localization of a functional Syc2039-GFP fusion protein  
343 (Supplementary Fig. 17E,F) contrasted the ambiguous *in vitro* polymerization pattern (Fig. 2).  
344 Filaments were readily observed in different cyanobacterial hosts, indicating that in Syc2039  
345 self-polymerization is independent of the host (Fig. 6A). Notably, however, Syc2039 formed  
346 different structures in each host. In *Anabaena*, filaments were long, curved and intertwined; in  
347 *Synechocystis* filaments appeared as spindle-like structures, and in *Synechococcus* filaments  
348 were long, sometimes helical and often aligned with or in close proximity to the cell periphery  
349 (Fig. 6A). A similar helical or cell periphery-aligned localization pattern was also observed in  
350 *E. coli* (Supplementary Fig. 18). In *Synechocystis* and *Synechococcus* Syc1139-GFP localized  
351 as spots in close proximity to the cytoplasmic membrane while being localized to the cell  
352 periphery in *E. coli* (Fig. 6A, Supplementary Fig. 18). Notably, Syc1139 failed to be expressed  
353 in *Anabaena*, suggesting that overexpression of this protein has a negative impact on that  
354 organism. Using double homologous gene replacement, we generated a  $\Delta$ *syc2039*  
355 *Synechococcus* mutant strain and a non-segregated  $\Delta$ *syc1139* *Synechococcus* mutant strain  
356 (Supplementary Fig. 17A,B,C). The non-segregated nature of the  $\Delta$ *syc1139* mutant suggests  
357 that this gene performs an essential cellular function. Colony integrity of the  $\Delta$ *syc2039* mutant  
358 was unaltered while the  $\Delta$ *syc1139* mutant was characterized by apparent changes in colony

359 morphology (Fig. 6B), which were lost upon growth on non-selective plates (Supplementary  
360 Fig. 17D). Additionally, both mutants presented an impairment in liquid culture growth: the  
361  $\Delta syc2039$  mutant grew in standard BG11 medium but failed to grow upon addition of several  
362 osmotic stressors, whereas the  $\Delta syc1139$  mutant failed to grow in liquid culture entirely (Fig.  
363 6C). Spot assays confirmed a decreased viability of the  $\Delta syc1139$  mutant and showed that it  
364 is highly sensitive to Proteinase K but unaffected by lysozyme (Supplementary Fig. 19A).  
365 These cell wall defects together with the *in vitro* cell-shape-like filamentation pattern suggest  
366 that Syc1139 might form a protective and protease-resistant proteinaceous layer below the  
367 cytoplasmic membrane. This would also be in concert with the distorted colony morphology of  
368 the non-segregated  $\Delta syc1139$  mutant strain. The  $\Delta syc2039$  mutant was unaffected by cell wall  
369 and membrane destabilizers (Supplementary Fig. 19B). To investigate the role of these  
370 proteins in cell division, the mutants were stained with DAPI and FtsZ was detected by  
371 immunofluorescence. A proportion of  $\Delta syc2039$  mutant cells exhibited a segregated DNA  
372 distribution either to both cell poles or to just one pole (Fig. 6D). Furthermore, some cells of  
373 both mutants lacked any discernible intracellular DNA or perceptible chlorophyll signal and  
374 were elongated compared to the WT (Fig. 6D,E). The WT phenotype of the  $\Delta syc2039$  mutant  
375 could be rescued by insertion of  $P_{trc}::syc2039-gfp$  or  $P_{syc2039}::syc2039$  into the neutral NS1  
376 locus (Bustos and Golden, 1992) (Supplementary Fig. 18E,F). Although mutant cells were  
377 elongated compared to the WT cells (Fig. 6E), the intracellular localization of FtsZ was  
378 unaffected (Supplementary Fig. 19C). Despite the defect in cytokinesis, the  $\Delta syc2039$  mutant  
379 strain grew similarly as the *Synechococcus* WT in liquid culture (Supplementary Fig. 19D).  
380 Taken together, Syc2039 forms abundant filamentous networks *in vivo* and is involved in  
381 cytokinesis or cell cycle control. We could further show that *syc1139* is an essential gene  
382 important for cytokinesis, cellular integrity and colony formation, implicating structural  
383 functions.

## 384 Discussion

385 Earlier studies suggested that there is likely a broad spectrum of coiled-coil rich and rod-  
386 domain containing proteins with IF-like function in prokaryotes (Bagchi *et al.*, 2008). And  
387 indeed, reports on such proteins followed with the discovery of Scy (in *Streptomyces coelicolor*)  
388 and several CCRPs from *Helicobacter pylori* (Waidner *et al.*, 2009; Walshaw, Gillespie and  
389 Kelemen, 2010; Specht *et al.*, 2011; Holmes *et al.*, 2013). Here we investigate further the  
390 presence and function of CCRPs with IF-like properties in prokaryotes, by predicting and  
391 evaluating CCPRs in cyanobacteria.

392 Our results show that Fm7001 assembles into polymers *in vitro* upon renaturation from  
393 urea as well as *in vivo*, and that this protein has an impact on cellular morphology, thereby  
394 fulfilling major IF criteria (Köster *et al.*, 2015; Kelemen, 2017). Consequently, we propose that  
395 Fm7001 constitutes a novel IF-like cytoskeletal protein specific to multicellular, cell-  
396 differentiating and branching cyanobacteria. The floating Fm7001 polymer sheet in high molar  
397 urea indicates an exceptionally high self-association capacity of Fm7001. In comparison, the  
398 eukaryotic vimentin exists only as tetramers in 5 M urea (Herrmann *et al.*, 1996). *In vivo*  
399 localization experiments revealed an essential role of the Fm7001 C-terminus for filamentation,  
400 which is a common observation for known prokaryotic cytoskeletal proteins, including MreB  
401 (Swulius and Jensen, 2012), crescentin (Ausmees, Kuhn and Jacobs-Wagner, 2003) as well  
402 as eukaryotic IF proteins (Geisler and Weber, 1982; Weber and Geisler, 1982; Traub and  
403 Vorgias, 1983; Nakamura *et al.*, 1993; Herrmann *et al.*, 1996). The assigned structural  
404 similarities of Fm7001 with acetyl-CoA-carboxylase provide further support for the theory that  
405 cytoskeletal proteins originated from metabolic enzymes that obtained polymerization features  
406 (Ingerson-Mahar and Gitai, 2012). Notwithstanding, the metabolic activity of Fm7001 was not  
407 evaluated in our study hence its presumed enzymatic activity remains unknown.

408 Several prokaryotic tubulin-like and actin-like cytoskeletal proteins, such as ParM and  
409 TubZ, are known to be encoded on plasmids or on bacteriophages (Hurme *et al.*, 1994;  
410 Wagstaff and Löwe, 2018). Slr7083 is encoded on the large toxin-antitoxin defense plasmid



411 (pSYSA) in *Synechocystis* (Kopfmann and Hess, 2013), thus it adds another protein to the list  
412 of those IF-like CCRP carried by an autonomously replicating genetic element. Preliminarily  
413 we suspected that Slr7083 has a role in plasmid-segregation similarly to ParM. However,  
414 Slr7083 showed no indications of dynamic properties, which would be indispensable for a  
415 plasmid segregation mechanism. Furthermore, unlike ParM (Carballido-Lopez, 2006), Slr7083  
416 did not localize in a spindle-like pattern *in vivo* and was only expressed at later growth phases,  
417 which is contradictory to a possible involvement in the cell cycle. In contrast, the polymers  
418 formed by Slr7083 *in vitro* and *in vivo* rather suggest that it could form a (protective)  
419 proteinaceous layer below the cytoplasmic membrane. Notably, Slr7083 *in vitro* structures  
420 resemble the nuclear lamina formed by nuclear lamins and FilP lace-like filaments (Stuurman,  
421 Heins and Aebi, 1998; Bagchi *et al.*, 2008; Fuchino *et al.*, 2013). It is thus conceivable that  
422 Slr7083 has a role in cellular stiffness as well as rigidity and mediates mechanical cell  
423 stabilization. Although, transcription data for *slr7083* suggests that it is not constantly  
424 expressed, challenging the idea of a cell-stabilizing function for Slr7083. In contrast, cell motility  
425 in *Synechocystis* seems to be partially regulated by Slr7083, reminiscent of the role of the actin  
426 cytoskeleton in eukaryotes.

427         The role of Slr7083 in cell motility is possibly mediated by means of its interaction with  
428 Slr1301, which has already previously been shown to be essential for twitching motility in  
429 *Synechocystis* (Bhaya *et al.*, 2001). So far it is unknown how photoreceptors transduce the  
430 perceived light stimuli to the motility apparatus in *Synechocystis* ultimately resulting in  
431 phototactic movements (Schuergers, Mullineaux and Wilde, 2017). It is tenable to hypothesize  
432 that Slr1301 might constitute the missing link between the two systems, possibly in  
433 combination with Slr7083. This hypothesis is supported by the physical interaction of Slr1301  
434 with PilB and the *in vivo* localization of Slr1301 that is similar to that observed for PilB  
435 (Schuergers *et al.*, 2015). A comparable complex was observed in *Pseudomonas aeruginosa*,  
436 where FimL (a proposed scaffolding protein) was shown to connect the chemosensory  
437 receptor system to the type IV pili apparatus, regulating the chemotactic and virulence  
438 pathways (Inclan *et al.*, 2016). Cellular motility of eukaryotic cells is strongly dependent on

439 cytoskeletal proteins (Cappuccinelli, 1980), thus it is likely that the cytoskeleton is a key factor  
440 for cell movements in prokaryotes as well. Although IFs do not directly participate in cell motility  
441 in eukaryotes (Lodish *et al.*, 2000), an adaptation of CCRPs in prokaryotes for this task is  
442 imaginable. Bactofilins constitute a separate class of prokaryotic-specific cytoskeletal proteins  
443 and were proposed to be involved in social motility in *C. crescentus* (Kühn *et al.*, 2010).  
444 Additionally, the filament-forming CCRP AglZ from *Myxococcus xanthus* was previously shown  
445 to govern gliding motility together with a multi-protein complex that also involves the MreB  
446 cytoskeleton (Yang *et al.*, 2004; Nan *et al.*, 2010). The interaction of Slr1301 with twitching  
447 motility proteins was apparent in the non-motile *Synechocystis* strain, hinting for additional  
448 beneficial functions of this interaction besides motility. Notably, we previously reported IF-like  
449 properties for Alr0931 (CypS), which is a homolog of Slr1301 in *Anabaena* (Springstein *et al.*,  
450 2019). While CypS polymerizes into filaments *in vitro*, Slr1301 does not, which could indicate  
451 a specific adaptation of CypS to filament formation in multicellular cyanobacteria. Despite their  
452 different cellular functions and *in vitro* polymerization properties, the homologous proteins  
453 Slr1301, Syc1139 and CypS retained the ability to cross-interact (Supplementary Fig. 20A).  
454 Further studies will focus on identifying the amino acid sequences that mediate this prevailed  
455 interaction, likely residing within the highly conserved amino acid sequence domains in this  
456 homologous group (Supplementary Fig. 20B). Consequently, it is conceivable that the  
457 functional diversification of the three proteins relies on the non-conserved amino acid  
458 sequences. These regions are putatively employed by other species-specific proteins,  
459 ultimately dictating their cellular functions.

460 TPR proteins are known to mediate protein-protein interactions and can assemble into  
461 multimers, but their ability to polymerize into filaments has not been described so far (Blatch  
462 and Lässle, 1999). Nonetheless, All4981 polymerizes *in vitro* and *in vivo* in all tested hosts.  
463 Additionally, it forms extracellular filaments and is presumably an essential protein. These  
464 observations suggest that All4981 is a *bona fide* prokaryotic IF-like protein consisting of TPRs.  
465 The association of All4981 with MreB, FtsZ-regulators, the S-layer and SepJ indicates that it  
466 might function as a bridge that connects the shape-determinants outside of the cell wall and

467 inside of the cytoplasmic membrane to the sites of cell-cell connection. A function of All4981  
468 in *Anabaena* cell and filament shape is also supported by its interaction with the *Anabaena*  
469 filament and cell shape stabilizing proteins LfiA and LfiB (Springstein et al., 2019).

470 Considering the presence of an N-terminal transmembrane domain and the lack of  
471 clear *in vitro* filaments, it is unlikely that Syc2039 constitutes a genuine IF-like protein.  
472 Nonetheless, the highly abundant filamentous network it formed in all tested bacterial hosts  
473 suggests that Syc2039 is associated with cytoskeletal structures in *Synechococcus*.  
474 Specifically, the elongated phenotype and the disturbed cytokinesis in the  $\Delta$ syc2039 and the  
475 non-segregated  $\Delta$ syc1139 mutant strains suggest an association with the FtsZ-driven  
476 elongasome. Direct interaction with FtsZ or MreB could not be shown, as such, future studies  
477 will attempt to unravel the presumed connection of the *Synechococcus* CCRPs to those two  
478 major cytoskeletal systems. Surprisingly, besides its cytokinetic defect, the  $\Delta$ syc2039 mutant  
479 showed growth characteristics similar to *Synechococcus* WT, suggesting that feedback  
480 mechanisms between cytokinesis and cell division are disturbed in the  $\Delta$ syc2039 mutant.

481 Our results reveal two novel filament-forming CCRPs from different cyanobacterial  
482 subsections and morphotypes (Fig. 7). Our study thus extends the spectrum of known CCRPs  
483 of IF-like function in prokaryotes and expands the set of functional properties associated with  
484 IF-like proteins in prokaryotes. Notably, as indicated by Bagchi *et al.* (2008), we demonstrate  
485 that the sole observation of coiled-coil-rich regions within a protein is not equal to IF-like  
486 function and evaluation of novel filament-forming proteins requires several *in vitro* and *in vivo*  
487 assays for validation. The cyanobacterial CCRPs we report here, like other bacterial CCRPs  
488 (Ausmees, Kuhn and Jacobs-Wagner, 2003; Bagchi *et al.*, 2008; Waidner *et al.*, 2009; Fiuza  
489 *et al.*, 2010; Specht *et al.*, 2011; Holmes *et al.*, 2013) and eukaryotic IFs (Alberts *et al.*, 2014),  
490 are important for cell shape determination (Fm7001, Syc1139 and Syc2039), mediate cellular  
491 motility (Slr7083 and Slr1301), DNA segregation (Syc1139 and Syc2039) and colony integrity  
492 (Syc1139). Therefore, our study strengthens the perception that, like eukaryotes, prokaryotes  
493 require organized internal complexes and even microcompartments to maintain cell shape,

494 size and proper cell function and highlights the usefulness of polymerized proteinaceous  
495 structures for cellular processes. Remarkably, some of the identified CCRPs were highly  
496 conserved among all cyanobacterial morphotypes, suggesting that their functions would also  
497 be conserved. Future studies are required in order to evaluate the functional conservation of  
498 homologous proteins in different cyanobacterial species. On the other hand, Syc2039 and  
499 Slr7083 are highly strain specific, possibly performing functions adapted to the very needs of  
500 their hosts. Similarly to the eukaryotic cytolinker proteins (Leung, Green and Liem, 2002;  
501 Wiche, Osmanagic-Myers and Castañón, 2015), cyanobacterial CCRPs were often associated  
502 with other cytoskeletal systems (MreB, FtsZ and other filament-forming CCRPs) and sites of  
503 cell-cell connections (i.e., SepJ), which demonstrates the necessity for those structures to be  
504 in a constant interplay even in comparably small cells. The discovery of IF-like filament-forming  
505 CCRPs with different levels of conservation in various cyanobacterial morphotypes thus opens  
506 up a new avenue of research on the cyanobacterial morphological diversity.

## 507 **Material and Methods**

### 508 Data and CCRP prediction

509 The cyanobacteria protein families were constructed from completely sequenced genomes  
510 available in RefSeq database (O'Leary *et al.*, 2015) (ver. May 2016; Supplementary File 2).  
511 For the construction of protein families, at the first stage, all protein sequences annotated in  
512 the genomes were blasted all-against-all using stand-alone BLAST (Altschul *et al.*, 1990)  
513 (V. 2.2.26). Protein sequence pairs that were found as reciprocal best BLAST hits (rBBHs;  
514 Tatusov, Koonin and Lipman, 1997) with a threshold of E-value  $\leq 1 \times 10^{-5}$  were further compared  
515 by global alignment using needle (EMBOSS package, V. 6.6.0.0; (Rice, Longden and Bleasby,  
516 2000). Sequence pairs having  $\geq 30\%$  identical amino acids were clustered into protein families  
517 using the Markov clustering algorithm (MCL) (Enright, Van Dongen and Ouzounis, 2002) (ver.  
518 12-135) with the default parameters. For the CCRPs prediction, 1,535 protein sequences  
519 containing non-standard amino acids were discarded. Coiled coil regions in protein sequences  
520 were predicted using PEPCOIL (EMBOSS package, V. 6.6.0.0; (Rice, Longden and Bleasby,  
521 2000). The algorithm was executed with a window size of 21 and the threshold for amino acids  
522 in coiled-coil conformation was set to  $\geq 80$  amino acid residues similarly as described by Bagchi  
523 *et al.* (2008). Statistical tests were performed with MatLab©. For the comparison of CCRPs  
524 proportion, the compared groups included: 1) SynProCya group, 2) unicellular cyanobacteria,  
525 3) unicellular cyanobacteria that divide in more than one plane, and 4) filamentous  
526 cyanobacteria. Identification of conserved amino acid domains within cyanobacterial CCRP  
527 homologs (CypS (Alr0931), Slr1301 and Syc1139) was done using MULTALIGN (Corpet,  
528 1988).

529 Protein candidates were further manually examined with online available bioinformatic  
530 tools (NCBI Conserved Domain (CD) Search (Marchler-Bauer *et al.*, 2016), TMHMM Server  
531 (Krogh *et al.*, 2001) (V. 2.0), PSIPRED (McGuffin, Bryson and Jones, 2000), PSORTb (Yu *et al.*,  
532 2010) (ver. 3.0), I-TASSER (Zhang, 2009). CCRPs exhibiting similar predictions to known  
533 IF and IF-like proteins like CreS, FilP, vimentin, desmin or keratin were selected, and proteins  
534 predicted to be involved in other cellular processes were excluded.

### 535 Bacterial strains and growth conditions

536 *Fischerella*, *Anabaena* and *Synechocystis* were obtained from the Pasteur Culture Collection  
537 (PCC) of cyanobacteria (France). *Synechococcus* was a gift from Martin Hagemann  
538 (University Rostock). Glucose-tolerant motile *Synechocystis* PCC-M substrain was a gift from  
539 Annegret Wilde (University Freiburg). Cells were grown photoautotrophically in BG11 or without  
540 combined nitrogen (BG11<sub>0</sub>) at a 16h/8h light/dark regime (*Fischerella*) or at constant light  
541 (*Anabaena*, *Synechococcus* and *Synechocystis*) with a light intensity of  $20 \mu\text{mol m}^{-2} \text{s}^{-1}$ . When

542 appropriate, 50  $\mu\text{g ml}^{-1}$  kanamycin (Km), 2.5  $\mu\text{g ml}^{-1}$  spectinomycin (Sp), 2.5  $\mu\text{g ml}^{-1}$   
543 streptomycin (Sm) or 30  $\mu\text{g ml}^{-1}$  neomycin (Nm) was added. Non-segregated  $\Delta\text{syc1139}$  cells  
544 were always grown in the presence of Km. *E. coli* strains DH5 $\alpha$ , DH5 $\alpha$ MCR, XL1-blue and  
545 HB101 were used for cloning and conjugation by triparental mating. BTH101 was used for  
546 BACTH assays and BL21 (DE3) was used for expression of His- and GFP-tagged proteins in  
547 *E. coli*. All *E. coli* strains (Supplementary Table 2) were grown in LB medium containing the  
548 appropriate antibiotics at standard concentrations.

#### 549 Plasmid and strain construction

550 All plasmids employed in this study were either generated by using standard restriction  
551 enzyme-base cloning procedures or using Gibson assembly (Gibson *et al.*, 2009). A detailed  
552 description of the cloning strategies for the respective plasmids is available upon request from  
553 the authors. All primers, plasmids and strains employed or generated in this study are listed in  
554 Supplementary Tables 2-5. GFP, YFP and eCFP protein tags were used as reporter proteins  
555 and His<sub>6</sub> tag was used for protein affinity purification. For gene replacement mutants,  
556 homologous flanks for double homologous recombination comprised 1000 bp upstream and  
557 downstream of the gene of interest. Mutant strains harboring gene replacements with antibiotic  
558 resistance cassettes (*nptII* or *CS.3*; Beck *et al.*, 1982; Sandvang, 1999) were verified by colony  
559 PCR testing for absence of gene of interest using primers #129/#130 for  $\Delta\text{slr7083}$ , primers  
560 #168/#169 for  $\Delta\text{slr1301}$ , primers #146/#147 for  $\Delta\text{syc2039}$  or primers #161/#162 for  $\Delta\text{syc1139}$ .  
561 We also attempted to generate gene replacement mutants for *all4981* and *fm7001* but  
562 remained unsuccessful.

#### 563 Transformation of cyanobacteria

564 Transformation of *Synechococcus* was achieved by natural transformation as described by  
565 Ivleva *et al.* (2005) and transformation of *Synechocystis* was accomplished by natural  
566 transformation as described by Vermaas *et al.* (2002) or by conjugation as described by  
567 Ungerer and Pakrasi (2016). *Anabaena* and *Fischerella* were transformed by conjugation as  
568 described by Ungerer and Pakrasi (2016) or Stucken *et al.* (2012), respectively. Ex-conjugant  
569 colonies from *Synechococcus* and *Synechocystis* carrying gene replacements were re-  
570 streaked three to four times and absence of genes of interest was verified by colony PCR.  
571 Transformation of sonicated (fragmented) and NaCl-treated *Fischerella* cells followed by the  
572 conjugational method described by Ungerer and Pakrasi (2016) was also feasible for  
573 *Fischerella*, albeit with a lower transformation frequency.

574 Phenotypic characterization of the mutant strains

575 Defects in cell viability were evaluated by spot assays adapted from Dörrich *et al.* (2014). Wild  
576 type and mutant strains from liquid cultures or BG11 plates were adjusted to an OD<sub>750</sub> of about  
577 0.4 in liquid BG11 liquid. Next, 5 µl of cells were spotted in triplicates onto BG11 plates or  
578 BG11 plates supplemented with Proteinase K or lysozyme at indicated concentrations in 10-  
579 fold serial dilutions and incubated under standard growth conditions until no further colonies  
580 arose in the highest dilution.

581 Growth defects were assessed with growth curves. For this, cells were grown in liquid BG11  
582 medium, washed three times by centrifugation (6500 x g, RT, 3 min) in BG11, adjusted to an  
583 OD<sub>750</sub> of 0.1 and then grown in triplicates or quadruples at standard growth conditions in 15 ml  
584 culture volumes. OD<sub>750</sub> values were recorded every 24 h.

585 Cell length of *Synechococcus* WT, mutant strains and mutant complementation strains was  
586 measured using the line tool from the imaging software Fiji.

587 Cell wall integrity defects were evaluated by testing the influence of osmotic factors on cell  
588 growth. *Synechococcus* WT and mutant strains were grown on BG11 agar plates, transferred  
589 to BG11 liquid medium and grown under standard growth conditions with or without 5 mM  
590 glucose, 200 mM glucose, 2 mM NH<sub>4</sub>Cl, 200 mM maltose or 500 mM NaCl.

591 To evaluate the motility of *Synechocystis* and PCC-M WT and mutant strains, three single  
592 colonies of the respective strain were streaked on a line on a BG11 growth plate. Growth plates  
593 were then placed into the standard culture incubator for 10 d with with illumination limited from  
594 one direction.

595 Protein purification and *in vitro* filamentation assays

596 C-terminally His<sub>6</sub>-tagged proteins were expressed and subsequently purified under denaturing  
597 conditions using Ni-NTA affinity columns as previously described by Springstein *et al.* (2019).  
598 For expression of MBP-Fm7001-His<sub>6</sub>, DH5α cells carrying pMAL-c2x-Fm7001-His<sub>6</sub> were  
599 grown and induced accordingly but in the presence of 0.2% glucose. Purified proteins were  
600 dialyzed overnight against polymerization buffer (PLB: 50 mM PIPES, 100 mM KCl, pH 7.0;  
601 HLB: 25 mM HEPES, 150 mM NaCl, pH 7.4) at 18 °C and 180 rpm with three bath changes  
602 using a Slide-A-Lyzer™ MINI Dialysis Device (10K MWCO, 0.5 ml or 2 ml; Thermo Fischer  
603 Scientific). Purified proteins were stained with 0.005 mg NHS-Fluorescein (Thermo Fischer  
604 Scientific) per 1 ml protein dialysate and *in vitro* filamentation was analyzed by epifluorescence  
605 microscopy.

606 For Fm7001-His<sub>6</sub>, proteins were slowly dialyzed against 2 mM Tris-HCl, 4.5 M urea, pH 7.5  
607 (18°C, 200 rpm) decreasing 0.5 M urea every 2 h (from 6 M to 4.5 M urea). The resulting  
608 floating filamentous web was then analyzed by bright field microscopy.

609 Syc2039-His<sub>6</sub> failed to be expressed in *E. coli* BL21 (DE3). To bypass this, Syc2039-GFP-His,  
610 under the control of an IPTG-inducible P<sub>trc</sub>, was inserted into a neutral locus of *Synechococcus*.  
611 Cells were grown to an OD<sub>750</sub> of 0.8 and protein expression was induced with 0.05 mM IPTG  
612 for 3 d. Induced cells were harvested and washed with PBS by centrifugation (4800 x g, 4 °C,  
613 10 min) and stored at -80 °C. Protein purification, dialysis and labeling was then performed as  
614 described above with the exception that BG11 growth medium was used as dialysate.

#### 615 Co-immunoprecipitation

616 For co-immunoprecipitations of fluorescently tagged CCRP candidates, cyanobacterial strains  
617 expressing YFP-All4981 or Slr1301-YFP were grown in BG11 or BG11<sub>0</sub> liquid medium. Co-  
618 immunoprecipitation was performed using the μMACS GFP isolation kit (Miltenyl Biotec) as  
619 previously described by Springstein *et al.* (2019) using PBS-N (PBS supplemented with 1%  
620 NP-40) or HSLB (50 mM NaH<sub>2</sub>PO<sub>4</sub>, 500 mM NaCl, 1% NP-40, pH 7.4) lysis buffers  
621 supplemented with a protease inhibitor cocktail (cOmplete™, EDTA-free Protease Inhibitor  
622 Cocktail, Sigma-Aldrich). Proteins were identified by mass spectrometry as previously  
623 described by Springstein *et al.* (2019) for YFP-All4981 or by Kahnt *et al.* (2007) for Slr1301-  
624 YFP.

#### 625 Immunofluorescence

626 The localization of FtsZ in *Synechococcus* WT and mutant strains was evaluated by  
627 immunofluorescence using a modified protocol from Heinz *et al.* (2016). In contrast, cells were  
628 lysed in 50 mM Tris-HCl pH 7.4, 10 mM EDTA and 0.2 mg ml<sup>-1</sup> lysozyme for 30 min at 37 °C  
629 and samples were blocked in 1x Roti®-ImmunoBlock (Carl Roth) in PBS supplemented with  
630 0.05% Tween 20. Samples were incubated with rabbit anti-FtsZ primary antibody (Agrisera;  
631 raised against *Anabaena* FtsZ; 1:250 diluted) in blocking buffer followed by incubation with 7.5  
632 μg ml<sup>-1</sup> Alexa Fluor 488-conjugated goat anti-rabbit IgG (H+L) secondary antibody (Thermo  
633 Fischer Scientific) in blocking buffer. Before microscopy, cells were stained with 10 μg ml<sup>-1</sup>  
634 DAPI (final concentration) in PBS.

#### 635 Brightfield and fluorescence microscopy analysis

636 Bacterial strains grown in liquid culture were either directly applied to a microscope slide or  
637 previously immobilized on a 2% low-melting agarose in PBS agarose pad and air dried before  
638 microscopic analysis. Epifluorescence microscopy was performed using an Axio Imager.M2  
639 light microscope (Carl Zeiss) equipped with Plan-Apochromat 63x/1.40 Oil M27 objective and



640 the AxioCam MR R3 imaging device (Carl Zeiss). GFP, Alexa Fluor 488, eCFP and YFP  
641 fluorescence was visualized using filter set 38 (Carl Zeiss; excitation: 470/40 nm band pass  
642 (BP) filter; emission: 525/50 nm BP). Chlorophyll auto-fluorescence was recorded using filter  
643 set 15 (Carl Zeiss; excitation: 546/12 nm BP; emission: 590 nm long pass). When applicable,  
644 cells were previously incubated in the dark at RT for about 5 min with 10  $\mu\text{g ml}^{-1}$  DAPI in PBS  
645 to stain intracellular DNA. For visualization of DAPI fluorescence filter set 49 (Carl Zeiss;  
646 excitation: G 365 nm; emission: 455/50 nm) was employed. *E. coli* BL21 (DE3) cells expressing  
647 C-terminally GFP-tagged protein candidates were grown over night in LB and then diluted 1:40  
648 in the same medium the following day. Cells were grown for 2 h at 37 °C, briefly acclimated to  
649 20 °C for 10 min and induced with 0.05 mM IPTG at 20 °C. Protein localization of GFP/YFP-  
650 tagged proteins was then observed after indicated time points of cells immobilized on an  
651 agarose pad.

## 652 Statistical analysis

653 Beta-galactosidase values were measured in triplicates from three independent colonies and  
654 significant differences compared to WT were determined by a one-way ANOVA using  
655 Dunnett's multiple comparison test. For statistical evaluation of *Synechococcus* WT and  
656 mutant cell length, a one-way ANOVA using Turkey's multiple comparison test was used.  
657 Significance levels are the same as for the beta-galactosidase assay. Statistical tests were  
658 performed with the GraphPad Prims 8.0.0 software. Significance levels are indicated by stars  
659 (\*) and correspond to: \*:  $P < 0.05$ , \*\*:  $P < 0.01$ , \*\*\*:  $P < 0.001$ , \*\*\*\*:  $P < 0.0001$ .

## 660 RNA isolation and RT-PCR

661 Total RNA was isolated from 10 ml culture using either the Direct-zol™ RNA MiniPrep Kit  
662 (Zymo Research; *Synechocystis*, *Synechococcus* and *Anabaena*) according to the  
663 manufacturer's instructions or the Plant RNA Reagent (Thermo Fischer Scientific; *Anabaena*,  
664 *Fischerella* and *Synechocystis*). For RNA isolation using the Plant RNA Reagent, a modified  
665 protocol was employed. To this end, cells were pelleted by centrifugation (4800 x *g*, 10 min, 4  
666 °C) and the supernatant was discarded. The pellet was resuspended in 0.5 ml of Plant RNA  
667 Reagent und lysed in a Precellys® 24 homogenizer (Bertin) with 3 strokes at 6500 rpm for 30  
668 s in 2 ml soil grinding (SK38) or tough microorganism (VK05) lysis tubes (Bertin). RNA was  
669 then isolated according to the manufacturer's instructions. Isolated RNA was treated with DNA-  
670 free™ Kit (2 units rDNAs/reaction; Thermo Fischer Scientific) and 1  $\mu\text{g}$  (*Fischerella*,  
671 *Synechocystis* and *Synechococcus*) or 200 ng (*Anabaena*) RNA was reverse transcribed using  
672 the Maxima™ H Minus cDNA Synthesis Master Mix (with dsDNase; Thermo Fischer Scientific,  
673 for *Fischerella*, *Synechocystis* and *Synechococcus*) or the qScript™ cDNA Synthesis Kit  
674 (Quanta Biosciences, for *Anabaena*). RT-PCR of cDNA samples for *fm7001*, *ftsZ*, *slr7083*,

675 *rnpB*, *slr1301*, *syc2039*, *syc1139*, *all4981*, *all4981+all4982* and *all4981+all4983* was done  
676 using primer pairs #1/#2, #3/#4, #5/#6, #7/#8, #9/#10, #11/#12, #13/#14, #15/#16, #17/#15  
677 and #18/#15, respectively.

## 678 Bacterial two hybrid assays

679 In this study, the BACTH system (Euromedex) was employed. Gene candidates were cloned  
680 into the expression vectors pKNT25, pKT25, pUT18 and pUT18C by GIBSON assembly,  
681 thereby generating C and N-terminal translational fusions to the T25 or T18 subunit.  
682 Chemically competent *E. coli* BTH101 ( $\Delta cya$ ) cells were co-transformed with 5 ng of the  
683 indicated plasmids, plated onto LB plates supplemented with 200  $\mu\text{g ml}^{-1}$  X-gal, 0.5 mM IPTG,  
684 Amp, Km and grown at 30 °C for 24-36 h. Interactions were quantified by beta-galactosidase  
685 assays from three colonies for each combination according to the protocol described by  
686 Euromedex or in a 96 well format according to Karimova, Davi and Ladant (2012). For this aim,  
687 cultures were either grown over night at 30 °C or for 2 d at 20 °C in LB Amp, Km, 0.5 mM IPTG  
688 and interaction strength of the investigated proteins was by quantified by beta-galactosidase-  
689 mediated hydrolyzation of ONPG (ortho-Nitrophenyl- $\beta$ -galactoside), which is then recorded in  
690 Miller units (Miller, 1992).

691

## 692 **Acknowledgements**

693 We thank Katrin Schumann, Myriam Barz, Lisa Stuckenschneider, Lisa-Marie Philipp and  
694 Marius Lasse Theune for their assistance in the experimental work. Furthermore, we thank  
695 Martin Thanbichler and Daniela Kiekebusch (both from Philipps University, Marburg, Germany)  
696 for their support with mass spectrometry analysis. The study was supported by the German  
697 science foundation (DFG) (Grant No. STU513/2-1 awarded to KS).

## 698 **Author contribution**

699 BLS and KS designed the study. BLS established and performed the experimental work with  
700 contributions from JW. CW and TD performed the comparative genomics analysis. AOH  
701 analyzed protein samples by mass spectrometry. BLS, TD and KS drafted the manuscript with  
702 contributions from all coauthors.

703 **References**

- 704 Alberts, B. *et al.* (2014) *Molecular Biology of the Cell*. 6th editio. Garland Science.
- 705 Altschul, S. F. *et al.* (1990) 'Basic local alignment search tool', *Journal of Molecular Biology*.  
706 Academic Press, 215(3), pp. 403–410. doi: 10.1016/S0022-2836(05)80360-2.
- 707 Ausmees, N., Kuhn, J. R. and Jacobs-Wagner, C. (2003) 'The bacterial cytoskeleton: An  
708 intermediate filament-like function in cell shape', *Cell*, pp. 705–713. doi: 10.1016/S0092-  
709 8674(03)00935-8.
- 710 Bagchi, S. *et al.* (2008) 'Intermediate filament-like proteins in bacteria and a cytoskeletal  
711 function in *Streptomyces*', *Molecular Microbiology*, 70(4), pp. 1037–1050. doi: 10.1111/j.1365-  
712 2958.2008.06473.x.
- 713 Beck, E. *et al.* (1982) 'Nucleotide sequence and exact localization of the neomycin  
714 phosphotransferase gene from transposon Tn5', *Gene*, 19(3), pp. 327–336. doi:  
715 10.1016/0378-1119(82)90023-3.
- 716 Bharat, T. A. M. *et al.* (2015) 'Structures of actin-like ParM filaments show architecture of  
717 plasmid-segregating spindles', *Nature*. Nature Publishing Group, a division of Macmillan  
718 Publishers Limited. All Rights Reserved., 523, p. 106. Available at:  
719 <https://doi.org/10.1038/nature14356>.
- 720 Bhaya, D. *et al.* (2001) 'Novel Motility Mutants of *Synechocystis* Strain PCC 6803 Generated  
721 by In Vitro Transposon Mutagenesis Novel Motility Mutants of *Synechocystis* Strain PCC 6803  
722 Generated by In Vitro Transposon Mutagenesis †', *Journal of Bacteriology*, 183(20), pp. 1–5.  
723 doi: 10.1128/JB.183.20.6140.
- 724 Bi, E. and Lutkenhaus, J. (1991) 'FtsZ ring structure associated with division in *Escherichia*  
725 *coli*', *Nature*, 354(6349), pp. 161–164. doi: 10.1038/354161a0.
- 726 Blatch, G. L. and Lässle, M. (1999) 'The tetratricopeptide repeat: A structural motif mediating  
727 protein-protein interactions', *BioEssays*, 21(11), pp. 932–939. doi: 10.1002/(SICI)1521-  
728 1878(199911)21:11<932::AID-BIES5>3.0.CO;2-N.
- 729 Boyer, H. and Roulland-Dessoix, D. (1969) 'A complementation analysis of the restrcition and  
730 modification of DNA in *Escherichia coli*.' , *J. Mol. Biol.*, 41, pp. 459–472.
- 731 Buikema, W. J. and Haselkorn, R. (2001) 'Expression of the *Anabaena* hetR gene from a  
732 copper-regulated promoter leads to heterocyst differentiation under repressing conditions',  
733 *Proceedings of the National Academy of Sciences*, 98(5), pp. 2729–2734. doi:

- 734 10.1073/pnas.051624898.
- 735 Bustos, S. A. and Golden, S. S. (1992) 'Light-regulated expression of the psbD gene family in  
736 *Synechococcus* sp. strain PCC 7942: evidence for the role of duplicated psbD genes in  
737 cyanobacteria', *Molecular and General Genetics MGG*, 232(2), pp. 221–230. doi:  
738 10.1007/BF00280000.
- 739 Cabeen, M. T. *et al.* (2009) 'Bacterial cell curvature through mechanical control of cell growth',  
740 *The EMBO Journal*, pp. 1208–1219. doi: 10.1038/emboj.2009.61.
- 741 Cai, Y. and Wolk, C. P. (1990) 'Use of a conditionally lethal gene in *Anabaena* sp. strain PCC  
742 7120 to select for double recombinants and to entrap insertion sequences', *Journal of*  
743 *Bacteriology*, 172(6), pp. 3138–3145.
- 744 Cappuccinelli, P. (1980) 'The movement of eukaryotic cells', in *Motility of Living Cells*.  
745 Dordrecht: Springer Netherlands, pp. 59–74. doi: 10.1007/978-94-009-5812-8\_4.
- 746 Carballido-Lopez, R. (2006) 'The Bacterial Actin-Like Cytoskeleton', *Microbiology and*  
747 *Molecular Biology Reviews*, 70(4), pp. 888–909. doi: 10.1128/MMBR.00014-06.
- 748 Charbon, G., Cabeen, M. T. and Jacobs-Wagner, C. (2009) 'Bacterial intermediate filaments:  
749 In vivo assembly, organization, and dynamics of crescentin', *Genes and Development*, pp.  
750 1131–1144. doi: 10.1101/gad.1795509.
- 751 Corpet, F. (1988) 'Multiple sequence alignment with hierarchical clustering.', *Nucleic acids*  
752 *research*, 16(22), pp. 10881–90. doi: 10.1093/nar/16.22.10881.
- 753 Dörrich, A. K. *et al.* (2014) 'Deletion of the *Synechocystis* sp. PCC 6803 kaiAB1C1 gene cluster  
754 causes impaired cell growth under light/dark conditions', *Microbiology (United Kingdom)*,  
755 160(2014), pp. 2538–2550. doi: 10.1099/mic.0.081695-0.
- 756 Enright, A. J., Van Dongen, S. and Ouzounis, C. A. (2002) 'An efficient algorithm for large-  
757 scale detection of protein families', *Nucleic acids research*. Oxford University Press, 30(7), pp.  
758 1575–1584.
- 759 Fiuza, M. *et al.* (2010) 'Phosphorylation of a novel cytoskeletal protein (RsmP) regulates rod-  
760 shaped morphology in *Corynebacterium glutamicum*', *Journal of Biological Chemistry*, pp.  
761 29387–29397. doi: 10.1074/jbc.M110.154427.
- 762 Flårdh, K. *et al.* (2012) 'Regulation of apical growth and hyphal branching in *Streptomyces*',  
763 *Current Opinion in Microbiology*, 15(6), pp. 737–743. doi:  
764 <https://doi.org/10.1016/j.mib.2012.10.012>.

- 765 Flores, E. *et al.* (2007) 'Septum-localized protein required for filament integrity and diazotrophy  
766 in the heterocyst-forming cyanobacterium *Anabaena* sp. strain PCC 7120', *Journal of*  
767 *Bacteriology*, 189(10), pp. 3884–3890. doi: 10.1128/JB.00085-07.
- 768 Fuchino, K. *et al.* (2013) 'Dynamic gradients of an intermediate filament-like cytoskeleton are  
769 recruited by a polarity landmark during apical growth', *Proceedings of the National Academy*  
770 *of Sciences*, pp. E1889–E1897. doi: 10.1073/pnas.1305358110.
- 771 Fuchs, E. and Weber, K. (1994) 'INTERMEDIATE FILAMENTS: Structure, Dynamics, Function  
772 and Disease', *Annual Review of Biochemistry*, 63, pp. 345–382.
- 773 Geisler, N. and Weber, K. (1982) 'The amino acid sequence of chicken muscle desmin  
774 provides a common structural model for intermediate filament proteins', *The EMBO journal*,  
775 1(12), pp. 1649–1656. Available at: <https://www.ncbi.nlm.nih.gov/pubmed/6202512>.
- 776 Gibson, D. G. *et al.* (2009) 'Enzymatic assembly of DNA molecules up to several hundred  
777 kilobases', *Nature Methods*, 6(5), pp. 343–345. doi: 10.1038/nmeth.1318.
- 778 Grant, S. G. *et al.* (1990) 'Differential plasmid rescue from transgenic mouse DNAs into  
779 *Escherichia coli* methylation-restriction mutants.', *Proceedings of the National Academy of*  
780 *Sciences*, 87(12), pp. 4645–4649. doi: 10.1073/pnas.87.12.4645.
- 781 Heinz, S. *et al.* (2016) 'Thylakoid Membrane Architecture in *Synechocystis* Depends on CurT,  
782 a Homolog of the Granal CURVATURE THYLAKOID1 Proteins', *The Plant Cell*, 28(9), pp.  
783 2238–2260. doi: 10.1105/tpc.16.00491.
- 784 Hempel, A. M. *et al.* (2012) 'The Ser/Thr protein kinase AfsK regulates polar growth and hyphal  
785 branching in the filamentous bacteria *Streptomyces*', *Proceedings of the National Academy of*  
786 *Sciences of the United States of America*. 2012/08/06. National Academy of Sciences,  
787 109(35), pp. E2371–E2379. doi: 10.1073/pnas.1207409109.
- 788 Herrero, A., Stavans, J. and Flores, E. (2016) 'The multicellular nature of filamentous  
789 heterocyst-forming cyanobacteria', *FEMS Microbiology Reviews*, 40(6), pp. 831–854. doi:  
790 10.1093/femsre/fuw029.
- 791 Herrmann, H. *et al.* (1996) 'Structure and assembly properties of the intermediate filament  
792 protein vimentin: The role of its head, rod and tail domains', *Journal of Molecular Biology*,  
793 264(5), pp. 933–953. doi: 10.1006/jmbi.1996.0688.
- 794 Herrmann, H. and Aebi, U. (2000) 'Intermediate filaments and their associates: Multi-talented  
795 structural elements specifying cytoarchitecture and cytodynamics', *Current Opinion in Cell*  
796 *Biology*, 12(1), pp. 79–90. doi: 10.1016/S0955-0674(99)00060-5.

- 797 Herrmann, H. and Aebi, U. (2004) 'Intermediate Filaments: Molecular Structure, Assembly  
798 Mechanism, and Integration Into Functionally Distinct Intracellular Scaffolds', *Annual Review*  
799 *of Biochemistry*, 73(1), pp. 749–789. doi: 10.1146/annurev.biochem.73.011303.073823.
- 800 Holmes, N. A. *et al.* (2013) 'Coiled-coil protein Scy is a key component of a multiprotein  
801 assembly controlling polarized growth in *Streptomyces*', *Proceedings of the National Academy*  
802 *of Sciences*, pp. E397–E406. doi: 10.1073/pnas.1210657110.
- 803 Hu, B. *et al.* (2007) 'MreB is important for cell shape but not for chromosome segregation of  
804 the filamentous cyanobacterium *Anabaena* sp. PCC 7120', *Molecular Microbiology*, 63(6), pp.  
805 1640–1652. doi: 10.1111/j.1365-2958.2007.05618.x.
- 806 Huang, H.-H. *et al.* (2010) 'Design and characterization of molecular tools for a Synthetic  
807 Biology approach towards developing cyanobacterial biotechnology', *Nucleic acids research*.  
808 2010/03/17. Oxford University Press, 38(8), pp. 2577–2593. doi: 10.1093/nar/gkq164.
- 809 Hurme, R. *et al.* (1994) 'Intermediate filament-like network formed in vitro by a bacterial coiled  
810 coil protein', *Journal of Biological Chemistry*, pp. 10675–10682.
- 811 Inclan, Y. F. *et al.* (2016) 'A scaffold protein connects type IV pili with the Chp chemosensory  
812 system to mediate activation of virulence signaling in *Pseudomonas aeruginosa*', *Molecular*  
813 *Microbiology*, 101(4), pp. 590–605. doi: 10.1111/mmi.13410.
- 814 Ingerson-Mahar, M. and Gitai, Z. (2012) 'A growing family: the expanding universe of the  
815 bacterial cytoskeleton', *FEMS Microbiol Rev*, 36(1), pp. 256–266. doi: 10.1111/j.1574-  
816 6976.2011.00316.x.
- 817 Ivleva, N. B. *et al.* (2005) 'LdpA: A component of the circadian clock senses redox state of the  
818 cell', *EMBO Journal*, 24(6), pp. 1202–1210. doi: 10.1038/sj.emboj.7600606.
- 819 Jain, I. H., Vijayan, V. and O'Shea, E. K. (2012) 'Spatial ordering of chromosomes enhances  
820 the fidelity of chromosome partitioning in cyanobacteria.', *Proceedings of the National*  
821 *Academy of Sciences of the United States of America*, 109(34), pp. 13638–43. doi:  
822 10.1073/pnas.1211144109.
- 823 Jones, L. J. F., Carballido-López, R. and Errington, J. (2001) 'Control of cell shape in bacteria:  
824 Helical, actin-like filaments in *Bacillus subtilis*', *Cell*, 104(6), pp. 913–922. doi: 10.1016/S0092-  
825 8674(01)00287-2.
- 826 Kahnt, J. *et al.* (2007) 'Post-translational modifications in the active site region of methyl-  
827 coenzyme M reductase from methanogenic and methanotrophic archaea', *The FEBS journal*.  
828 Wiley Online Library, 274(18), pp. 4913–4921.

- 829 Kalliomaa-Sanford, A. K. *et al.* (2012) 'Chromosome segregation in Archaea mediated by a  
830 hybrid DNA partition machine', *Proceedings of the National Academy of Sciences*, 109(10),  
831 pp. 3754–3759. doi: 10.1073/pnas.1113384109.
- 832 Karimova, G., Davi, M. and Ladant, D. (2012) 'The  $\beta$ -lactam resistance protein Blr, a small  
833 membrane polypeptide, is a component of the Escherichia coli cell division machinery', *Journal*  
834 *of Bacteriology*, 194(20), pp. 5576–5588. doi: 10.1128/JB.00774-12.
- 835 Kelemen, G. H. (2017) 'Intermediate Filaments Supporting Cell Shape and Growth in Bacteria  
836 BT - Prokaryotic Cytoskeletons: Filamentous Protein Polymers Active in the Cytoplasm of  
837 Bacterial and Archaeal Cells', in Löwe, J. and Amos, L. A. (eds). Cham: Springer International  
838 Publishing, pp. 161–211. doi: 10.1007/978-3-319-53047-5\_6.
- 839 Koch, R. *et al.* (2017) 'Plasticity first: Molecular signatures of a complex morphological trait in  
840 filamentous cyanobacteria', *BMC Evolutionary Biology*. BMC Evolutionary Biology, 17(1), pp.  
841 1–11. doi: 10.1186/s12862-017-1053-5.
- 842 Kopfmann, S. and Hess, W. R. (2013) 'Toxin-antitoxin systems on the large defense plasmid  
843 pSYSA of synechocystis sp. pCC 6803', *Journal of Biological Chemistry*, 288(10), pp. 7399–  
844 7409. doi: 10.1074/jbc.M112.434100.
- 845 Köster, S. *et al.* (2015) 'Intermediate filament mechanics in vitro and in the cell: From coiled  
846 coils to filaments, fibers and networks', *Current Opinion in Cell Biology*, 32, pp. 82–91. doi:  
847 10.1016/j.ceb.2015.01.001.
- 848 Krogh, A. *et al.* (2001) 'Predicting transmembrane protein topology with a hidden Markov  
849 model: application to complete genomes', *Journal of molecular biology*. Elsevier, 305(3), pp.  
850 567–580.
- 851 Kruse, T., Bork-Jensen, J. and Gerdes, K. (2005) 'The morphogenetic MreBCD proteins of  
852 Escherichia coli form an essential membrane-bound complex', *Molecular Microbiology*, 55(1),  
853 pp. 78–89. doi: 10.1111/j.1365-2958.2004.04367.x.
- 854 Kühn, J. *et al.* (2010) 'Bactofilins, a ubiquitous class of cytoskeletal proteins mediating polar  
855 localization of a cell wall synthase in Caulobacter crescentus', *EMBO Journal*, pp. 327–339.  
856 doi: 10.1038/emboj.2009.358.
- 857 Kunert, A., Hagemann, M. and Erdmann, N. (2000) 'Construction of promoter probe vectors  
858 for Synechocystis sp. PCC 6803 using the light-emitting reporter systems Gfp and LuxAB',  
859 *Journal of Microbiological Methods*, 41(3), pp. 185–194. doi: 10.1016/S0167-7012(00)00162-  
860 7.

- 861 Larsen, R. A. *et al.* (2007) 'Treadmilling of a prokaryotic tubulin-like protein, TubZ, required for  
862 plasmid stability in *Bacillus thuringiensis*', *Genes and Development*, 21(11), pp. 1340–1352.  
863 doi: 10.1101/gad.1546107.
- 864 Leipe, D. D. *et al.* (2002) 'Classification and evolution of P-loop GTPases and related  
865 ATPases', *Journal of Molecular Biology*. Academic Press, 317(1), pp. 41–72. doi:  
866 10.1006/JMBI.2001.5378.
- 867 Leung, C. L., Green, K. J. and Liem, R. K. H. (2002) 'Plakins: A family of versatile cytolinker  
868 proteins', *Trends in Cell Biology*, 12(1), pp. 37–45. doi: 10.1016/S0962-8924(01)02180-8.
- 869 Lin, L. and Thanbichler, M. (2013) 'Nucleotide-independent cytoskeletal scaffolds in bacteria',  
870 *Cytoskeleton*, 70(8), pp. 409–423. doi: 10.1002/cm.21126.
- 871 Lodish, H. *et al.* (2000) *Molecular Cell Biology*. 4th edn. New York: W. H. Freeman. Available  
872 at: <https://www.ncbi.nlm.nih.gov/books/NBK21560/> (Accessed: 27 February 2018).
- 873 Lopes Pinto, F. *et al.* (2011) 'FtsZ degradation in the cyanobacterium *Anabaena* sp. strain PCC  
874 7120', *Journal of Plant Physiology*. Elsevier GmbH., 168(16), pp. 1934–1942. doi:  
875 10.1016/j.jplph.2011.05.023.
- 876 Löwe, J. and Amos, L. A. (2009) 'Evolution of cytomotive filaments: The cytoskeleton from  
877 prokaryotes to eukaryotes', *International Journal of Biochemistry and Cell Biology*, 41(2), pp.  
878 323–329. doi: 10.1016/j.biocel.2008.08.010.
- 879 Lupas, A., Van Dyke, M. and Stock, J. (1991) 'Predicting coiled coils from protein sequences',  
880 *Science*, pp. 1162–1164. doi: 10.1126/science.252.5009.1162.
- 881 Marchler-Bauer, A. *et al.* (2016) 'CDD/SPARCLE: functional classification of proteins via  
882 subfamily domain architectures', *Nucleic acids research*. Oxford University Press, 45(D1), pp.  
883 D200–D203.
- 884 McGuffin, L. J., Bryson, K. and Jones, D. T. (2000) 'The PSIPRED protein structure prediction  
885 server', *Bioinformatics*. Oxford University Press, 16(4), pp. 404–405.
- 886 Meselson, M. and Yuan, R. (1968) 'DNA restriction enzyme from *E. coli*.', *Nature*, 217(5134),  
887 pp. 1110–4. Available at: <http://www.ncbi.nlm.nih.gov/pubmed/4868368> (Accessed: 22  
888 February 2018).
- 889 Miller, J. H. (1992) *A Short Course in Bacterial Genetics – A Laboratory Manual and Handbook*  
890 *for Escherichia coli and Related Bacteria*, Cold Spring Harbor Laboratory Press. Cold Spring  
891 Harbor. doi: 10.1002/jobm.3620330412.



- 892 Nakamura, Y. *et al.* (1993) 'Acceleration of bovine neurofilament L assembly by deprivation of  
893 acidic tail domain', *European Journal of Biochemistry*, 212(2), pp. 565–571. doi:  
894 10.1111/j.1432-1033.1993.tb17694.x.
- 895 Nan, B. *et al.* (2010) 'A multi-protein complex from *Myxococcus xanthus* required for bacterial  
896 gliding motility', *Molecular Microbiology*, 76(6), pp. 1539–1554. doi: 10.1111/j.1365-  
897 2958.2010.07184.x.
- 898 Nayar, A. S. *et al.* (2007) 'FraG is necessary for filament integrity and heterocyst maturation in  
899 the cyanobacterium *Anabaena* sp. strain PCC 7120', *Microbiology*, 153(2), pp. 601–607. doi:  
900 10.1099/mic.0.2006/002535-0.
- 901 O'Leary, N. A. *et al.* (2015) 'Reference sequence (RefSeq) database at NCBI: current status,  
902 taxonomic expansion, and functional annotation', *Nucleic acids research*. Oxford University  
903 Press, 44(D1), pp. D733–D745.
- 904 Ormö, M. *et al.* (1996) 'Crystal Structure of the *Aequorea victoria* Green Fluorescent Protein',  
905 *Science*, 273(5280), pp. 1392 LP – 1395. Available at:  
906 <http://science.sciencemag.org/content/273/5280/1392.abstract>.
- 907 Ramos-León, F. *et al.* (2015) 'Divisome-dependent subcellular localization of cell-cell joining  
908 protein SepJ in the filamentous cyanobacterium *Anabaena*', *Molecular Microbiology*, 96(3), pp.  
909 566–580. doi: 10.1111/mmi.12956.
- 910 Rice, P., Longden, I. and Bleasby, A. (2000) 'EMBOSS: the European Molecular Biology Open  
911 Software Suite.', *Trends in genetics: TIG*. Elsevier, 16(6), pp. 276–7. doi: 10.1016/S0168-  
912 9525(00)02024-2.
- 913 Rippka, R. *et al.* (1979) 'Generic Assignments, Strain Histories and Properties of Pure Cultures  
914 of Cyanobacteria', *Microbiology*, 111(1), pp. 1–61. doi: 10.1099/00221287-111-1-1.
- 915 Sandvang, D. (1999) 'Novel streptomycin and spectinomycin resistance gene as a gene  
916 cassette within a class 1 integron isolated from *Escherichia coli*', *Antimicrobial Agents and*  
917 *Chemotherapy*, 43(12), pp. 3036–3038. doi: 10.1128/AAC.44.2.475-475.2000.
- 918 Schuergers, N. *et al.* (2015) 'PilB localization correlates with the direction of twitching motility  
919 in the cyanobacterium *Synechocystis* sp. PCC 6803', *Microbiology (Reading, England)*,  
920 161(2015), pp. 960–966. doi: 10.1099/mic.0.000064.
- 921 Schuergers, N., Mullineaux, C. W. and Wilde, A. (2017) 'Cyanobacteria in motion', *Current*  
922 *Opinion in Plant Biology*. Elsevier Ltd, 37, pp. 109–115. doi: 10.1016/j.pbi.2017.03.018.

- 923 Shoeman, R. L. and Traub, P. (1993) 'Assembly of Intermediate Filaments', *Bioessays*, 15(9),  
924 pp. 605–611. doi: 10.1002/bies.950150906.
- 925 Specht, M. *et al.* (2011) 'Helicobacter pylori Possesses Four Coiled-Coil-Rich Proteins That  
926 Form Extended Filamentous Structures and Control Cell Shape and Motility', *Journal of*  
927 *Bacteriology*, 193(17), pp. 4523–4530. doi: 10.1128/JB.00231-11.
- 928 Springstein, B. L. *et al.* (2019) 'A cytoskeletal network maintains filament shape in the  
929 multicellular cyanobacterium *Anabaena* sp. PCC 7120', *bioRxiv*, p. 553073. doi:  
930 10.1101/553073.
- 931 Stucken, K. *et al.* (2012) 'Transformation and conjugal transfer of foreign genes into the  
932 filamentous multicellular cyanobacteria (subsection V) *Fischerella* and *Chlorogloeopsis*',  
933 *Current Microbiology*, 65(5), pp. 552–560. doi: 10.1007/s00284-012-0193-5.
- 934 Studier, F. W. and Moffatt, B. A. (1986) 'Use of bacteriophage T7 RNA polymerase to direct  
935 selective high-level expression of cloned genes', *Journal of Molecular Biology*, 189(1), pp.  
936 113–130. doi: 10.1016/0022-2836(86)90385-2.
- 937 Stuurman, N., Heins, S. and Aebi, U. (1998) 'Nuclear lamins: Their structure, assembly, and  
938 interactions', *Journal of Structural Biology*, 122(1–2), pp. 42–66. doi: 10.1006/jsbi.1998.3987.
- 939 Swulius, M. T. and Jensen, G. J. (2012) 'The helical mreB cytoskeleton in *Escherichia coli*  
940 MC1000/pLE7 is an artifact of the N-terminal yellow fluorescent protein tag', *Journal of*  
941 *Bacteriology*, 194(23), pp. 6382–6386. doi: 10.1128/JB.00505-12.
- 942 Tatusov, R. L., Koonin, E. V and Lipman, D. J. (1997) 'A genomic perspective on protein  
943 families', *Science*. American Association for the Advancement of Science, 278(5338), pp. 631–  
944 637.
- 945 Tolonen, A. C., Liszt, G. B. and Hess, W. R. (2006) 'Genetic manipulation of *Prochlorococcus*  
946 strain MIT9313: green fluorescent protein expression from an RSF1010 plasmid and Tn5  
947 transposition', *Applied and environmental microbiology*. 2006/10/13. American Society for  
948 Microbiology, 72(12), pp. 7607–7613. doi: 10.1128/AEM.02034-06.
- 949 Traub, P. and Vorgias, C. E. (1983) 'Involvement of the N-terminal polypeptide of vimentin in  
950 the formation of intermediate filaments', *Journal of Cell Science*, 63(1), pp. 43 LP – 67.  
951 Available at: <http://jcs.biologists.org/content/63/1/43.abstract>.
- 952 Ungerer, J. and Pakrasi, H. B. (2016) 'Cpf1 Is A Versatile Tool for CRISPR Genome Editing  
953 Across Diverse Species of Cyanobacteria', *Scientific Reports*. Nature Publishing Group, 6, pp.  
954 1–9. doi: 10.1038/srep39681.

- 955 Vermaas, W. F. J. *et al.* (2002) 'Transformation of the cyanobacterium *Synechocystis* sp. PCC  
956 6803 as a tool for genetic mapping: optimization of efficiency', *FEMS Microbiology Letters*,  
957 206(2), pp. 215–219. doi: 10.1111/j.1574-6968.2002.tb11012.x.
- 958 Wagstaff, J. and Löwe, J. (2018) 'Prokaryotic cytoskeletons: protein filaments organizing small  
959 cells', *Nature Reviews Microbiology*. Nature Publishing Group. doi: 10.1038/nrmicro.2017.153.
- 960 Waidner, B. *et al.* (2009) 'A novel system of cytoskeletal elements in the human pathogen  
961 *Helicobacter pylori*', *PLoS Pathogens*. doi: 10.1371/journal.ppat.1000669.
- 962 Walshaw, J., Gillespie, M. D. and Kelemen, G. H. (2010) 'A novel coiled-coil repeat variant in  
963 a class of bacterial cytoskeletal proteins', *Journal of Structural Biology*, pp. 202–215. doi:  
964 10.1016/j.jsb.2010.02.008.
- 965 Weber, K. and Geisler, N. (1982) 'The structural relation between intermediate filament  
966 proteins in living cells and the alpha-keratins of sheep wool', *The EMBO journal*, 1(10), pp.  
967 1155–1160. Available at: <https://www.ncbi.nlm.nih.gov/pubmed/6202505>.
- 968 Wiche, G., Osmanagic-Myers, S. and Castañón, M. J. (2015) 'Networking and anchoring  
969 through plectin: A key to IF functionality and mechanotransduction', *Current Opinion in Cell  
970 Biology*, 32, pp. 21–29. doi: 10.1016/j.ceb.2014.10.002.
- 971 Wickstead, B. and Gull, K. (2011) 'The evolution of the cytoskeleton', *Journal of Cell Biology*,  
972 194(4), pp. 513–525. doi: 10.1083/jcb.201102065.
- 973 Wilk, L. *et al.* (2011) 'Outer membrane continuity and septosome formation between vegetative  
974 cells in the filaments of *Anabaena* sp. PCC 7120', *Cellular Microbiology*, 13(11), pp. 1744–  
975 1754. doi: 10.1111/j.1462-5822.2011.01655.x.
- 976 Woldemeskel, S. A. and Goley, E. D. (2017) 'Shapeshifting to Survive: Shape Determination  
977 and Regulation in *Caulobacter crescentus*', *Trends in Microbiology*, pp. 673–687. doi:  
978 10.1016/j.tim.2017.03.006.
- 979 Wolk, C. P. *et al.* (1988) 'Isolation and complementation of mutants of *Anabaena* sp. strain  
980 PCC 7120 unable to grow aerobically on dinitrogen.', *Journal of bacteriology*, 170(3), pp. 1239–  
981 1244. doi: 10.1128/jb.170.3.1239-1244.1988.
- 982 Yang, J. and Zhang, Y. (2015) 'I-TASSER server: New development for protein structure and  
983 function predictions', *Nucleic Acids Research*, 43(W1), pp. W174–W181. doi:  
984 10.1093/nar/gkv342.
- 985 Yang, R. *et al.* (2004) 'AglZ Is a Filament-Forming Coiled-Coil Protein Required for

- 986 Adventurous Gliding Motility of *Myxococcus xanthus*', *Journal of bacteriology*, 186(18), pp.  
987 6168–6178. doi: 10.1128/JB.186.18.6168.
- 988 Yu, N. Y. *et al.* (2010) 'PSORTb 3.0: Improved protein subcellular localization prediction with  
989 refined localization subcategories and predictive capabilities for all prokaryotes',  
990 *Bioinformatics*, 26(13), pp. 1608–1615. doi: 10.1093/bioinformatics/btq249.
- 991 Zhang, C.-C. C. *et al.* (1995) 'Analysis of genes encoding the cell division protein FtsZ and a  
992 glutathione synthetase homologue in the cyanobacterium *Anabaena* sp. PCC 7120', *Research*  
993 *in Microbiology*, 146(6), pp. 445–455. doi: 10.1016/0923-2508(96)80290-7.
- 994 Zhang, Y. (2009) 'I-TASSER: Fully automated protein structure prediction in CASP8', *Proteins:*  
995 *Structure, Function and Bioinformatics*, 77(SUPPL. 9), pp. 100–113. doi: 10.1002/prot.22588.
- 996 Zhou, J. *et al.* (2014) 'Discovery of a super-strong promoter enables efficient production of  
997 heterologous proteins in cyanobacteria', *Scientific Reports*, 4, pp. 1–6. doi:  
998 10.1038/srep04500.
- 999

1000 **Figures**

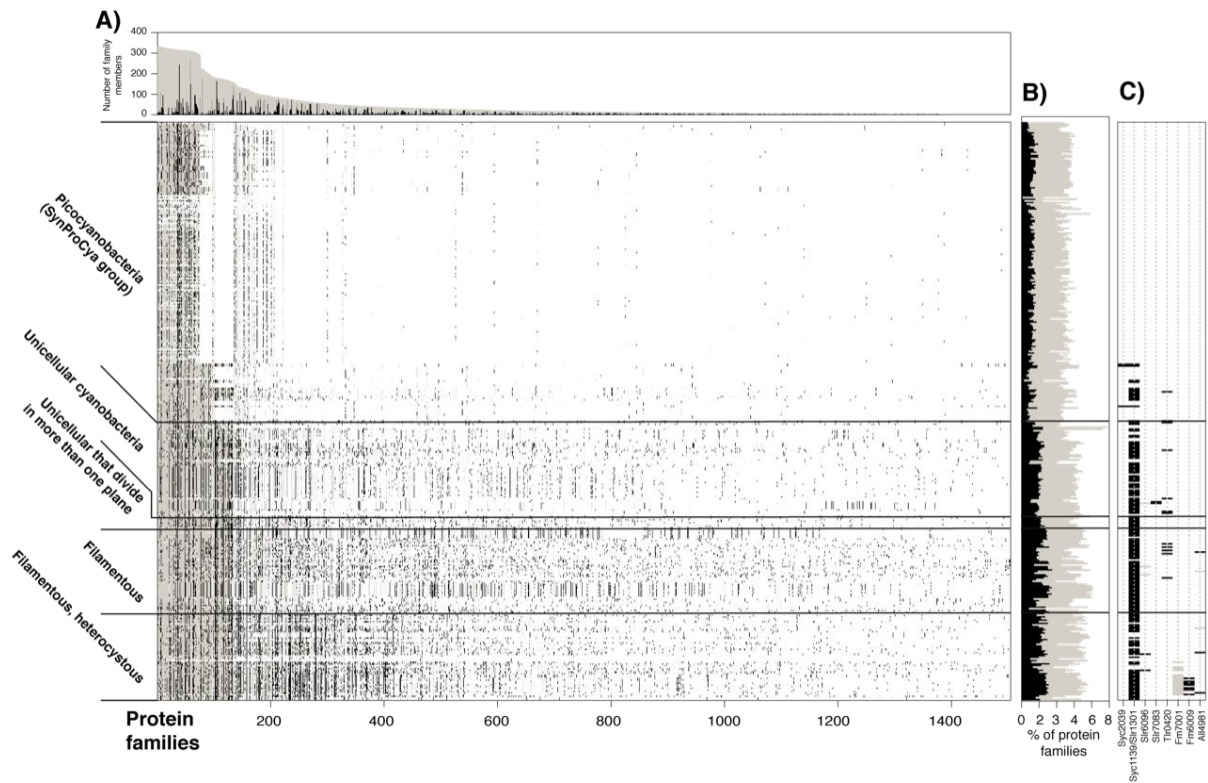

1001

1002 **Fig. 1: Distribution of CCRP protein families within cyanobacteria**

1003 (A) Lines in the presence/absence matrix designate cyanobacterial genomes; each column shows a protein family.  
1004 Gray dots designate any homologous protein in the same protein family and black dots represent CCRP members.  
1005 Protein families are sorted according to the number of members. Protein family size and the number of CCRP  
1006 members are presented in a bar graph above. (B) The proportion of protein families containing CCRPs (gray) and  
1007 CCRP proteins (black) in each genome. (C) Presence/absence pattern of CCRP candidate protein families. Only  
1008 protein families with at least three members predicted to be CCRPs are shown.

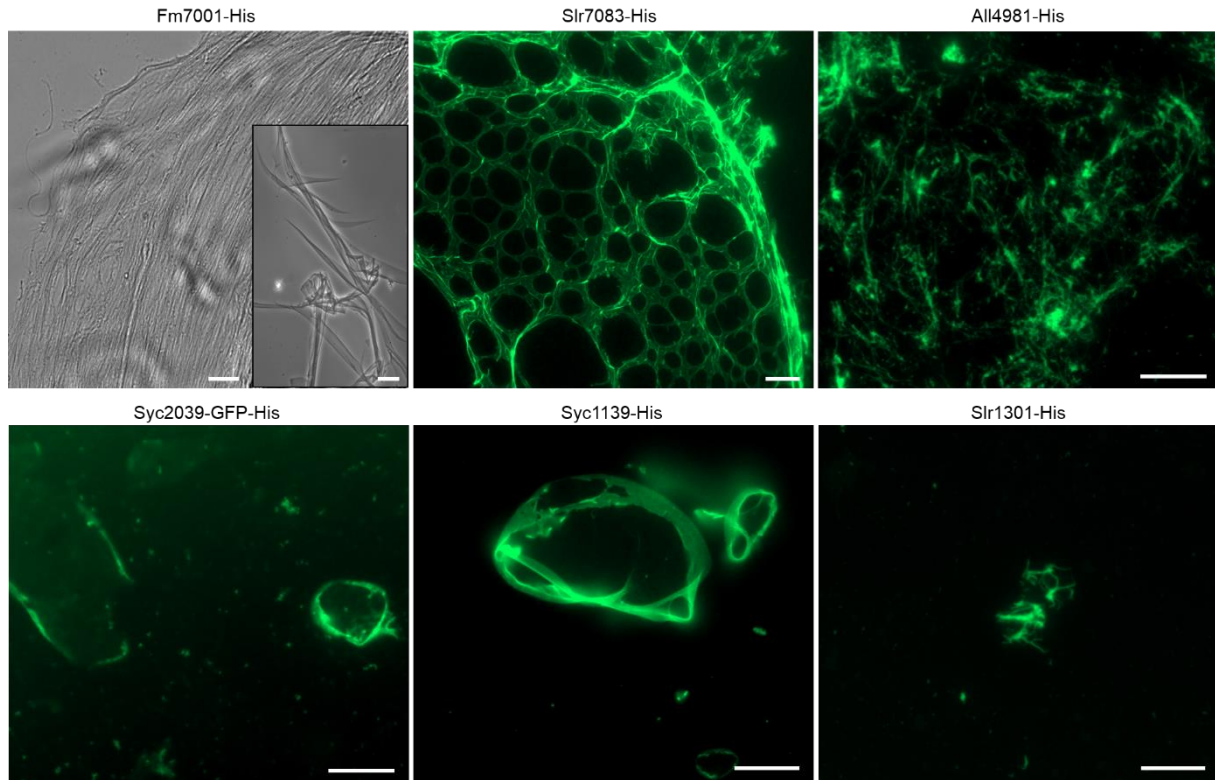

1009

1010 **Fig. 2: Cyanobacterial CCRPs assemble into diverse filamentous structures *in vitro***

1011 Bright field and epifluorescence micrographs of filamentous structures formed by purified and renatured Fm7001-  
1012 His<sub>6</sub> (0.7 mg ml<sup>-1</sup>), Slr7083-His<sub>6</sub> (1 mg ml<sup>-1</sup>), All4981-His<sub>6</sub> (0.5 mg ml<sup>-1</sup>), Syc2039-GFP-His<sub>6</sub> (0.3 mg ml<sup>-1</sup>), Syc1139-  
1013 His<sub>6</sub> (0.5 mg ml<sup>-1</sup>) and Slr1301-His<sub>6</sub> (0.5 mg ml<sup>-1</sup>). Proteins were dialyzed into 2 mM Tris-HCl, 4.5 M urea pH 7.5  
1014 (Fm7001), HLB (Slr7083), PLB (All4981, Syc1139, Slr1301) or BG11 (Syc2039). Renatured proteins were either  
1015 directly analyzed by bright field microscopy (Fm7001) or stained with an excess of NHS-Fluorescein and analyzed  
1016 by epifluorescence microscopy. The NHS-Fluorescein dye binds primary amines and is thus incompatible with urea,  
1017 which is why Fm7001 filaments were visualized by bright field microscopy. Scale bars: 10 µm or (Fm7001 inlay and  
1018 Slr7083) 20 µm.

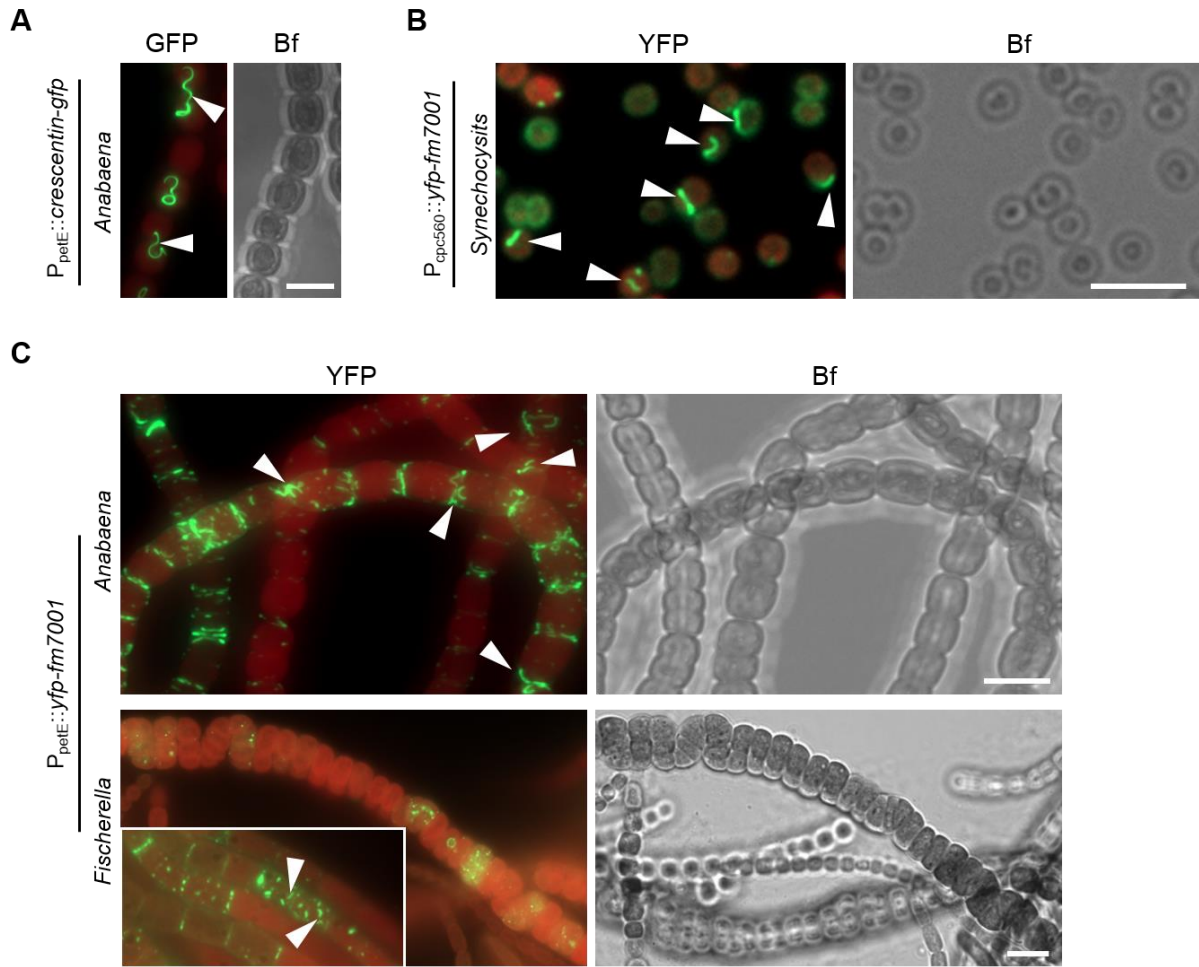

1019

1020 **Fig. 3: Host-independency for Fm7001 *in vivo* filamentation**

1021 Merged GFP fluorescence and chlorophyll autofluorescence (red) and bright field micrographs of *Anabaena*,  
 1022 *Synechocystis* or *Fischerella* cells expressing (A) crescentin-GFP or (B,C) YFP-Fm7001. Cells were either grown  
 1023 in (A,B,C upper image) liquid BG11 or (D lower image) liquid BG11 without copper supplemented with 0.5 μM  
 1024 CuSO<sub>4</sub>. Notably, YFP-Fm7001-expressing *Fischerella* cells failed to grow upon transfer to BG11 liquid medium and  
 1025 protein expression had to be induced with the addition of CuSO<sub>4</sub> later on. This indicates that Fm7001 must be  
 1026 strictly regulated for proper culture development. White triangles point to (A) seemingly cell-cell traversing  
 1027 crescentin-GFP filaments or (B,C) selected YFP-Fm7001 filamentous strings within the cell. Notably, unlike in  
 1028 *Anabaena* and *Fischerella*, Fm7001-GFP induced a swollen morphotype in *E. coli* and a subpopulation of  
 1029 *Synechocystis* cells (Supplementary Fig. 6). (A) Crescentin forms filaments with a diameter of 10 nm (Ausmees,  
 1030 Kuhn and Jacobs-Wagner, 2003) while the diameter of the GFP protein is approximately 2.4 nm (Ormö *et al.*, 1996).  
 1031 As such, crescentin-GFP could traverse through the septal junctions, which are predicted to be between 5-14 nm  
 1032 in diameter (Herrero, Stavans and Flores, 2016). (A,C top image): maximum intensity projection of a Z-stack. Scale  
 1033 bars: (A,B, C top image) 5 μm, (C lower image) 10 μm.

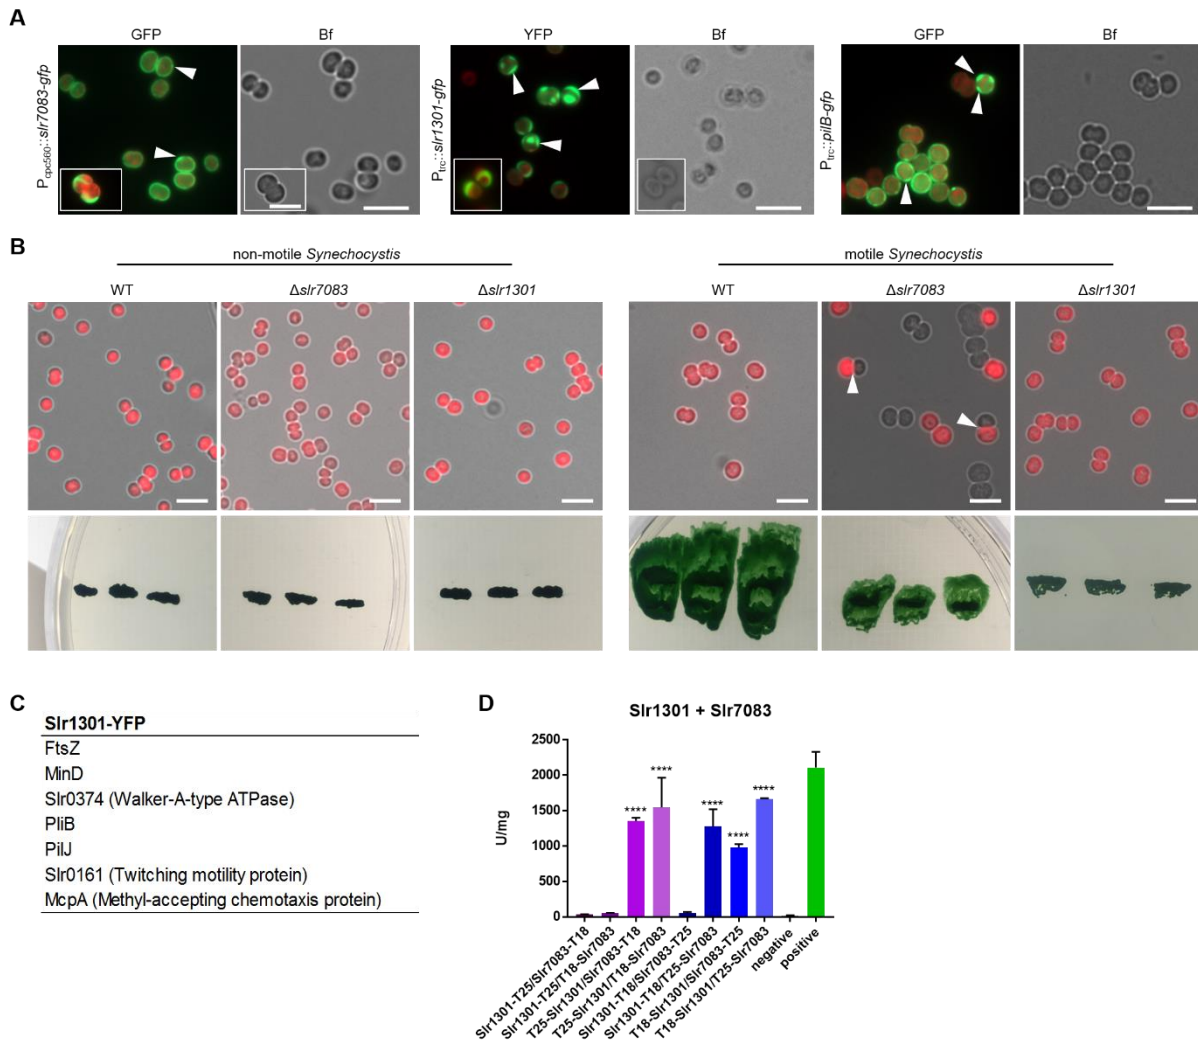

**Fig. 4: Sir7083 and Sir1301 are involved in twitching motility in *Synechocystis***

1034  
1035

1036 (A) Merged GFP fluorescence and chlorophyll autofluorescence (red) and bright field micrographs of *Synechocystis*  
 1037 cells expressing, Sir7083-GFP, Sir1301-YFP or PilB-GFP from  $P_{cpc560}$  (Sir7083) or  $P_{trc}$  (Sir1301, PilB). Expression  
 1038 of PilB-GFP in PCC-M resulted in the same localization pattern (data not shown). White triangles indicate focal  
 1039 spots and crescent-like formations. (B) Merged bright field and chlorophyll autofluorescence micrographs of motile  
 1040 and non-motile *Synechocystis* WT,  $\Delta sir7083$  and  $\Delta sir1301$  mutant cells. Below, motility tests of three single colonies  
 1041 from indicated cells streaked on BG11 plates and illuminated from only one direction are shown. (C) Excerpt of  
 1042 interacting proteins of interest from mass spectrometry analysis of anti-GFP co-immunoprecipitations of  
 1043 *Synechocystis* cells expressing Sir1301-YFP from  $P_{trc}$  grown in BG11 (Supplementary Fig. 11B). (D) Beta-  
 1044 galactosidase assays of *E. coli* cells co-expressing indicated translational fusion constructs of all possible pair-wise  
 1045 combinations of Sir7083 with Sir1301 grown for 1 d at 30 °C. Quantity values are given in Miller Units per milligram  
 1046 LacZ of the mean results from three independent colonies. Error bars indicate standard deviations. Neg: pKNT25  
 1047 plasmid carrying *slr1301* co-transformed with empty pUT18C. Pos: Zip/Zip control. \*: P < 0.05, \*\*: P < 0.01, \*\*\*: P <  
 1048 0.001, \*\*\*\*: P < 0.0001 (Dunnett's multiple comparison test and one-way ANOVA). Scale bars: 5  $\mu$ m.



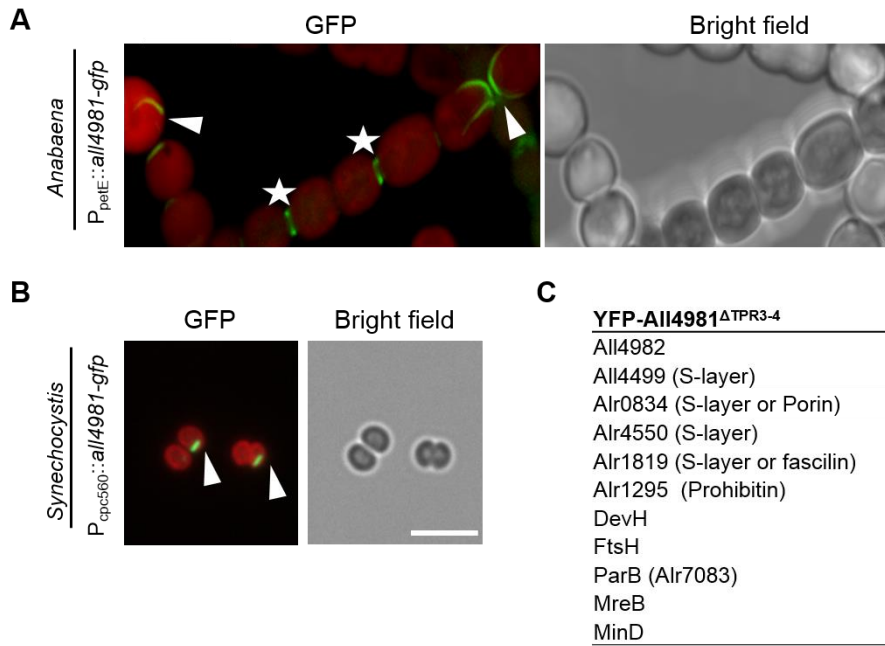

1049

1050 **Fig. 5: All4981 forms cell-traversing filaments in cyanobacteria**

1051 (A,B) GFP fluorescence and merged GFP fluorescence and chlorophyll autofluorescence (red) and bright field  
1052 micrographs of (A) *Anabaena* and (B) *Synechocystis* cells expressing All4981-GFP. *Anabaena* cells were grown in  
1053 BG11<sub>0</sub> and *Synechocystis* cells were grown in BG11. (A): Maximum intensity projections of a Z-stack. White  
1054 triangles indicate selected filaments traversing through the cells. White arrows point to spindle-like YFP-All4981  
1055 filaments. White stars mark septal formations between two neighboring cells. Scale bars: 5  $\mu$ m. (C) Excerpt of  
1056 interacting proteins of interest from mass spectrometry analysis of anti-GFP co-immunoprecipitations of *Anabaena*  
1057 cells expressing YFP-All4981 $\Delta$ TPR3-4 from  $P_{petE}$  (Supplementary Fig. 11A).

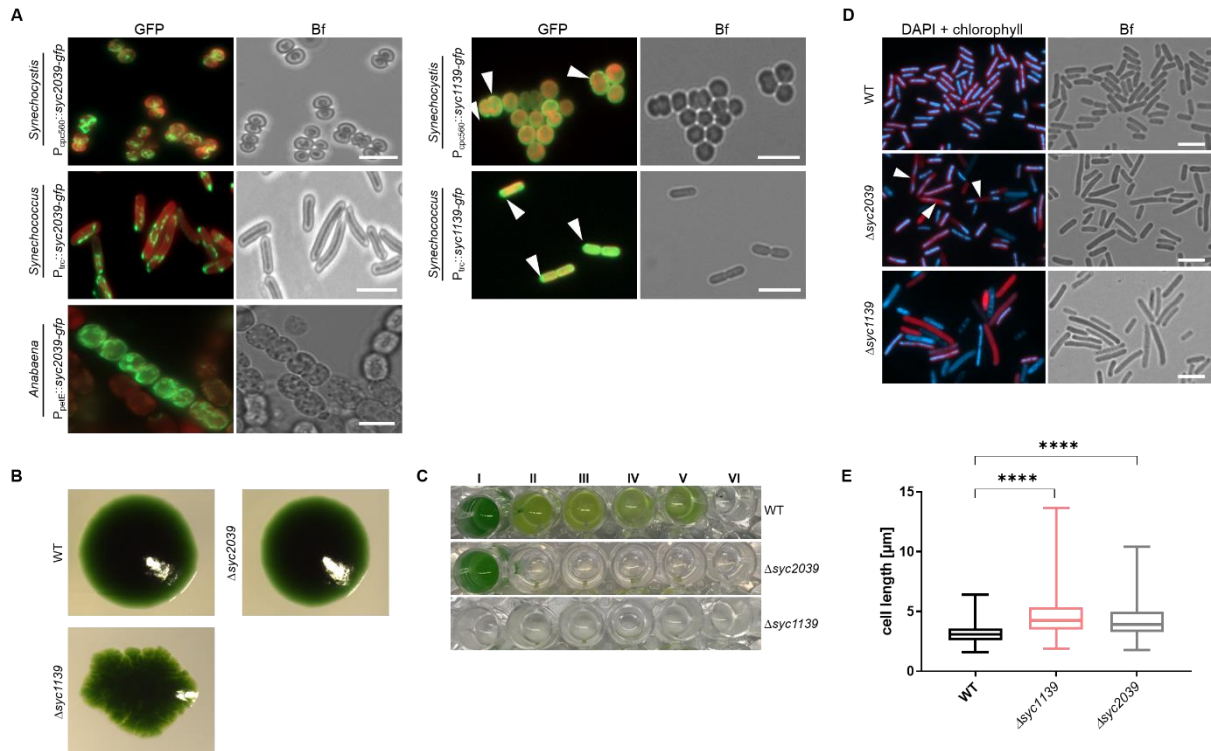

1058

1059 **Fig. 6: *Synechococcus* CCRPs affect cytokinesis and cellular integrity**

1060 (A) Merged GFP fluorescence and chlorophyll autofluorescence (red) and bright field micrographs of *Synechocystis*,  
 1061 *Synechococcus* and *Anabaena* cells expressing Syc2039-GFP or Syc1139-GFP from  $P_{trc}$ . *Synechocystis* cells were  
 1062 grown in BG11, *Anabaena* cells were grown in BG11<sub>0</sub> supplemented with 0.25  $\mu\text{M}$   $\text{CuSO}_4$  for 1 day, and  
 1063 *Synechococcus* cells were grown on BG11 plates supplemented with 0.01 mM (Syc2039) or 1 mM (Syc1139) IPTG.  
 1064 Micrographs of *Synechococcus* and *Anabaena* cells expressing Syc2039-GFP are maximum intensity projections  
 1065 of a Z-stack. White triangles indicate Syc1139-GFP spots. Attempts to translationally fuse a YFP-tag to the N-  
 1066 terminus of Syc2039 were unsuccessful, possibly due to the transmembrane domain predicted to the Syc2039 N-  
 1067 terminus (Supplementary Table 1). (B) Colony formation of *Synechococcus* WT and mutant strains on BG11 plates.  
 1068 (C) Cell viability of *Synechococcus* WT and mutant strains grown in (I) BG11 or BG11 supplemented with (II) 5 mM  
 1069 glucose, (III) 200 mM glucose, (IV) 2 mM  $\text{NH}_4\text{Cl}$ , (V) 200 mM maltose or (VI) 500 mM NaCl. (D) Merged DAPI  
 1070 fluorescence and chlorophyll autofluorescence (red) and bright field micrographs of *Synechococcus* WT and mutant  
 1071 strains grown on BG11 plates and stained with 10  $\mu\text{g ml}^{-1}$  DAPI. White triangles indicate non-dividing cells revealing  
 1072 inhomogeneous DNA placement. (E) Cell length of *Synechococcus* WT (n = 648), non-segregated  $\Delta\text{syc1139}$  (n =  
 1073 417) and  $\Delta\text{syc2039}$  mutant (n = 711) cells. Values indicated with \* are significantly different from the WT. \*\*\*\*: P <  
 1074 0.0001 (one-way ANOVA, using Turkey's multiple comparison test: P < 0.0001 for WT vs. each mutant). Scale bars:  
 1075 5  $\mu\text{m}$ .

### Fm7001

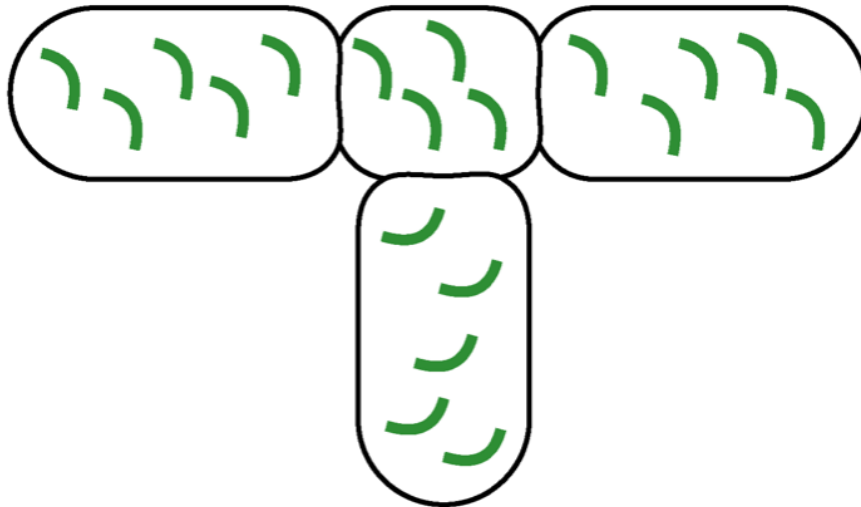

### All4981

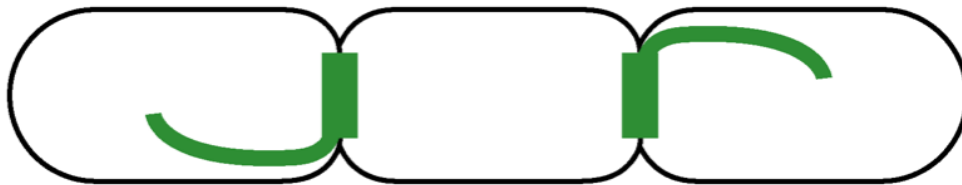

### Syc2039/Syc1139

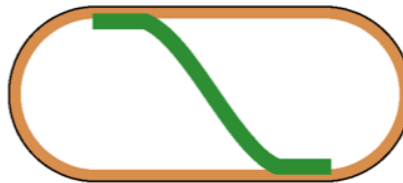

### Slr1301/Slr7083

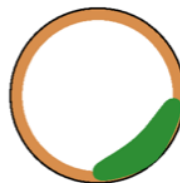

1076

#### 1077 Fig. 7: Cyanobacterial CCRP systems

1078 Schematic models for the *in vivo* localization of cyanobacterial CCRPs in their respective hosts. Fm7001 forms  
1079 filamentous strings in *Fischerella*. In *Anabaena*, All4981 assembles into pole-arising filaments that traverse through  
1080 the cell or forms septal-localized bridge-like formations. Syc2039, either independently of other *Synechococcus*  
1081 proteins, or in direct cooperation with other filamentous proteins, forms long and sometimes helical strings that are  
1082 often aligned with or in close proximity to the cell periphery. In *Synechococcus*, Syc1139 likely forms a protective  
1083 proteinaceous layer below the cytoplasmic membrane. In *Synechocystis*, Slr1301 forms crescent-like structures  
1084 while Slr7083 seemingly underlies the cytoplasmic membrane. Both localization types were also observed for PilB,  
1085 suggesting a cooperative function.

1086 **Supplementary information**

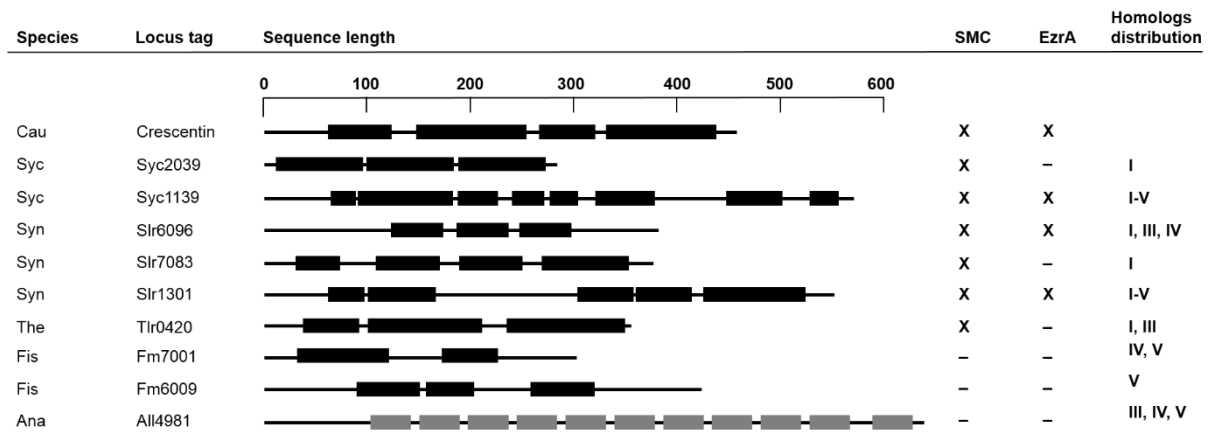

1087

1088 **Supplementary Fig. 1: Distribution of coiled-coil domains in CCRPs selected for experimental validation**

1089 Depiction of cyanobacterial CCRP candidates selected for experimental evaluation. Scale on top is given in amino  
 1090 acid residues. Amino acid sequences in coiled-coil conformation are depicted by black bars with non-coiled-coil  
 1091 sequences represented by black lines. Tetra-tryptophan repeats (TPR), also predicted by the COILS algorithm, are  
 1092 shown as grey bars. Proteins are given as cyanobase locus tags. Fm7001 and Fm6009 correspond to NCBI  
 1093 accession numbers WP\_016868005.1 and WP\_020476706, respectively. Abbreviations: Cau: *Caulobacter*  
 1094 *crenscentus*; Syc: *Synechococcus*, Syn: *Synechocystis*; Ana: *Anabaena*; The: *Thermosynechococcus elongatus* BP-  
 1095 1; Fis: *Fischerella*. Cyanobacterial CCRPs revealed conserved domains present in other prokaryotic IF-like and  
 1096 eukaryotic IF proteins (Supplementary Table 1). Presence of a structural maintenance of chromosomes (SMC)  
 1097 domain or structural similarities to the cell division protein EzrA are marked with "X", absence are indicated with "-".  
 1098 Full list of domain and structural similarities are given in Supplementary Table 1. Notably, Fm7001 reveals domain  
 1099 similarities to the metabolic enzyme acetyl-CoA carboxylase. Last column indicates presence of homologs in  
 1100 indicated subsections (I, II, III, IV, V). Note: *Anabaena* CCRPs have been described elsewhere before: *Springstein*  
 1101 *et al.*, bioRxiv, doi: 10.1101/553073.

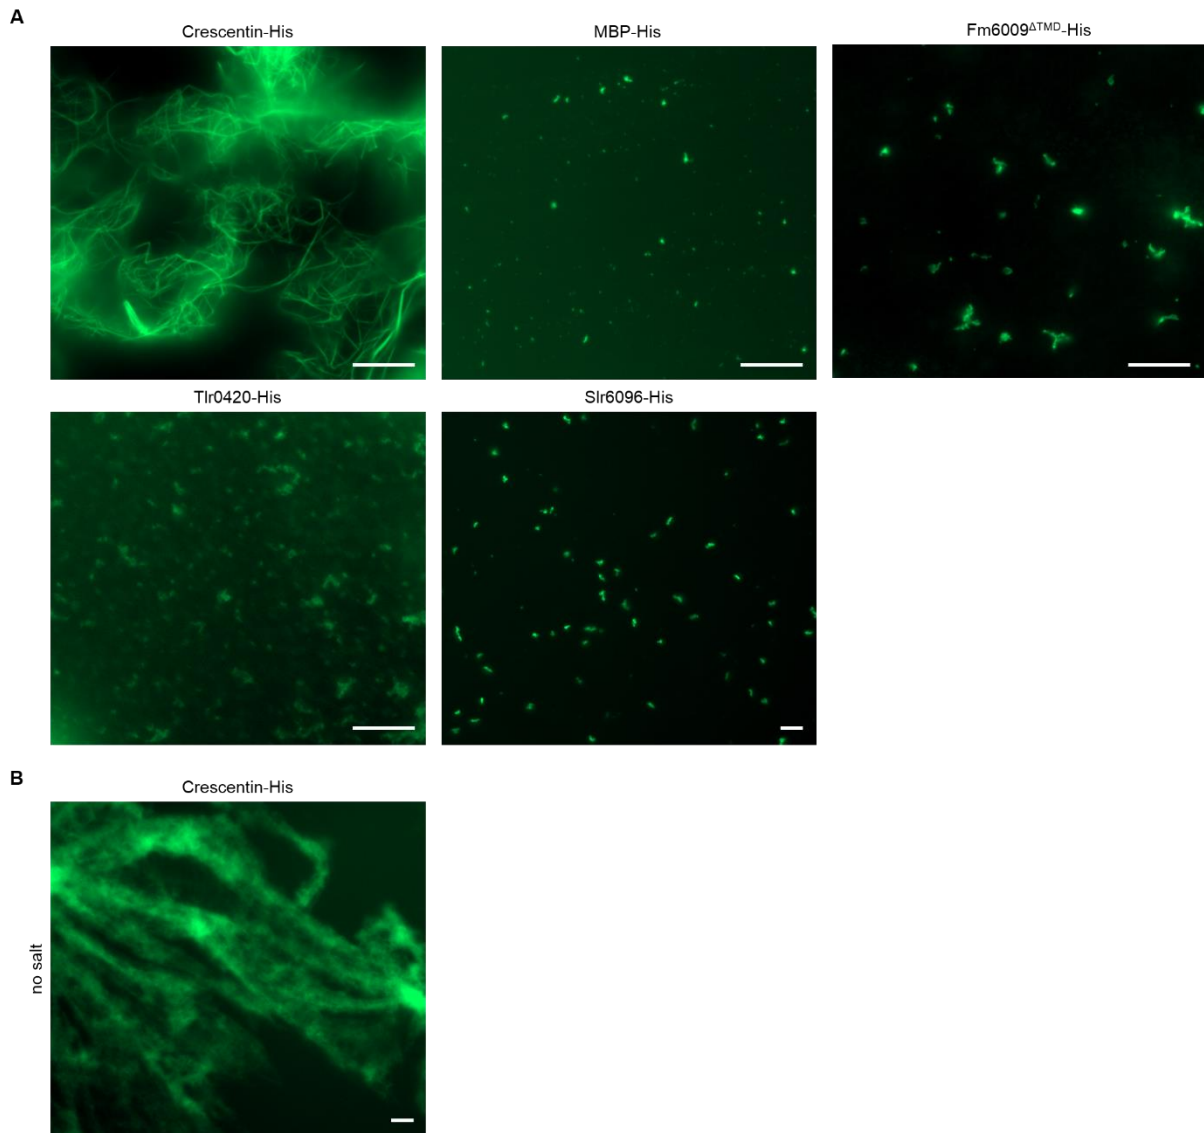

1102

1103 **Supplementary Fig. 2: Crescentin *in vitro* polymerization is dependent on monovalent ions**

1104 (A) NHS-fluorescein fluorescence micrographs of *in vitro* structures formed by purified and renatured Crescentin-  
1105 His<sub>6</sub> (0.7 mg ml<sup>-1</sup>), Fm6009<sup>ATMD</sup>-His<sub>6</sub> (lacking the first 91 aa), MBP-His<sub>6</sub>, Tlr0420-His<sub>6</sub> or Slr6096-His<sub>6</sub> (1 mg ml<sup>-1</sup>  
1106 each) in HLB or (B) Crescentin-His<sub>6</sub> (0.7 mg ml<sup>-1</sup>) renatured in 25 mM Hepes, pH 7.4. Crescentin-His *in vitro*  
1107 polymerization into smooth filaments is strictly dependent of the presence of salt in the renaturation buffer as  
1108 Crescentin-His without salt assembles only into filamentous aggregates. Proteins were dialyzed in a step-wise urea-  
1109 decreasing manner and stained with an excess of NHS-Fluorescein. Scale bars: 10  $\mu$ m.

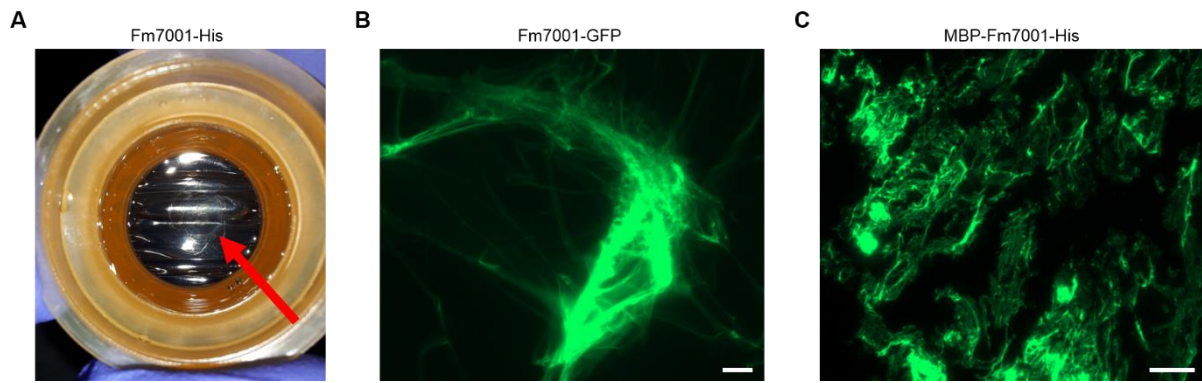

1110

1111 **Supplementary Fig. 3: Fm7001 polymerizes in vitro in the presence of high-molar urea**

1112 (A) Bright field micrograph of a sheet-like and flat object floating on top of the dialysate (red arrow) formed upon  
1113 dialysis of Fm7001-His<sub>6</sub> (0.7 mg ml<sup>-1</sup>) into 2 mM Tris-HCl, 4.5 M urea, pH 7.5. (B,C) Epifluorescence micrographs  
1114 of filamentous structures formed by (B) whole cell-free extract of *E. coli* BL21 (DE3) expressing Fm7001-GFP (0.7  
1115 mg ml<sup>-1</sup> whole protein) dialyzed into 2 mM Tris-HCl, 3 M urea, pH 7.5 and by (C) natively purified MBP-Fm7001-  
1116 His<sub>6</sub> (0.8 mg ml<sup>-1</sup>) dialyzed into HLB. Scale bars: (B) 20 μm and (C) 10 μm.

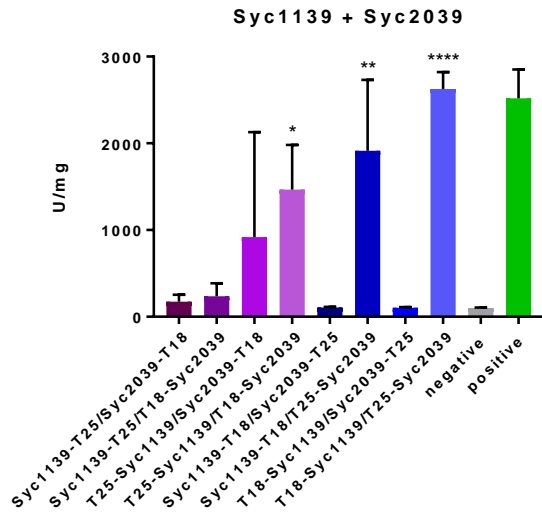

1117

1118 **Supplementary Fig. 4: *Synechococcus* CCRPs interact with each other**

1119 Beta-galactosidase assays (BACTH) of *E. coli* BTH101 cells co-expressing indicated T25 and T18 translational  
1120 fusions of all possible pair-wise combinations of Syc1139 and Syc2039. *E. coli* cells carrying the respective plasmids  
1121 were subjected to the beta-galactosidase assay as described by (Karimova, Davi and Ladant, 2012) in triplicates  
1122 from three independent colonies grown for 2 d at 20 °C. Quantity values are given in Miller Units per milligram LacZ  
1123 of the mean results from three independent colonies. Negative: N-terminal T25 fusion construct of the respective  
1124 protein co-transformed with empty pUT18C. Positive: Zip/Zip control. Error bars indicate standard deviations. \*: P  
1125 < 0.05, \*\*: P < 0.01, \*\*\*\*: P < 0.0001 (Dunnett's multiple comparison test and one-way ANOVA).

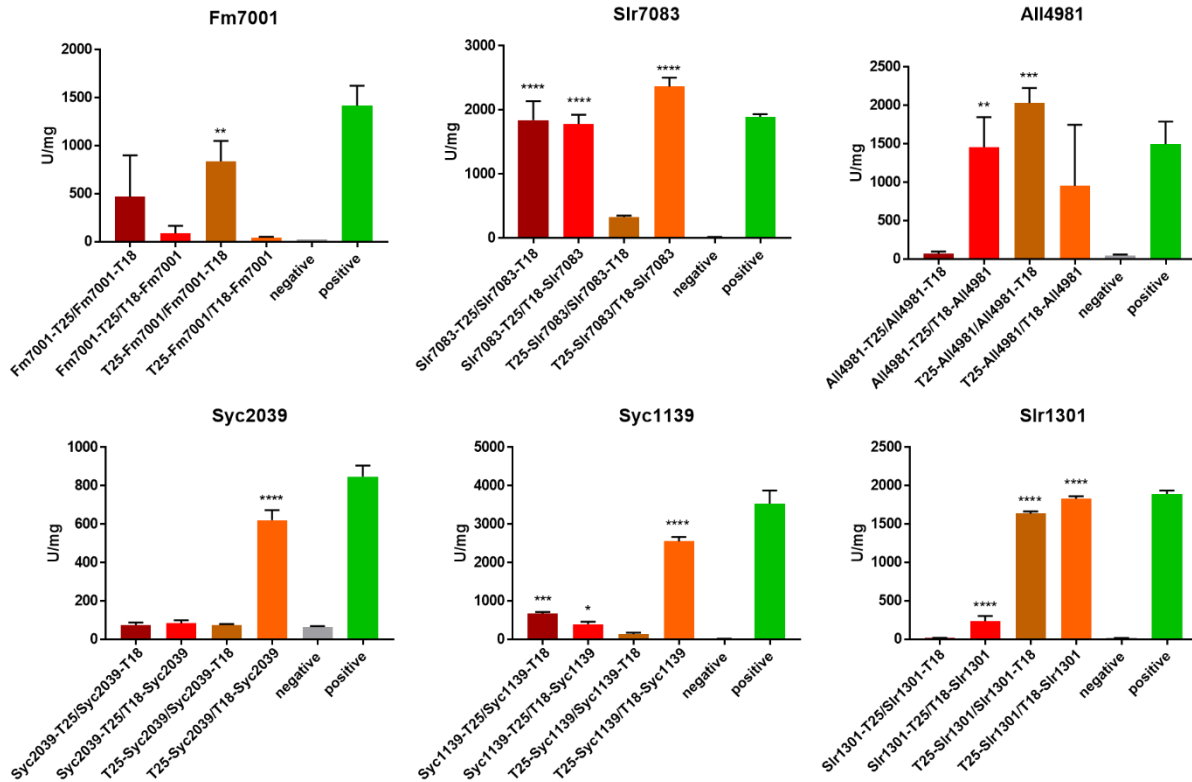

1126

1127 **Supplementary Fig. 5: Cyanobacterial CCRPs interact with themselves**

1128 Beta-galactosidase assays (BACTH) of *E. coli* BTH101 cells co-expressing indicated T25 and T18 translational  
 1129 fusions of all possible pair-wise combinations. *E. coli* cells carrying the respective plasmids were subjected to beta-  
 1130 galactosidase assay described by (Karimova, Davi and Ladant, 2012) in triplicates from three independent colonies  
 1131 grown for 1 d at 30 °C. Quantity values are given in Miller Units per milligram LacZ of the mean results from three  
 1132 independent colonies. Negative: N-terminal T25 fusion construct of the respective protein co-transformed with  
 1133 empty pUT18C. Positive: Zip/Zip control. Error bars indicate standard deviations. \*: P < 0.05, \*\*: P < 0.01, \*\*\*: P <  
 1134 0.001, \*\*\*\*: P < 0.0001 (Dunnett's multiple comparison test and one-way ANOVA).



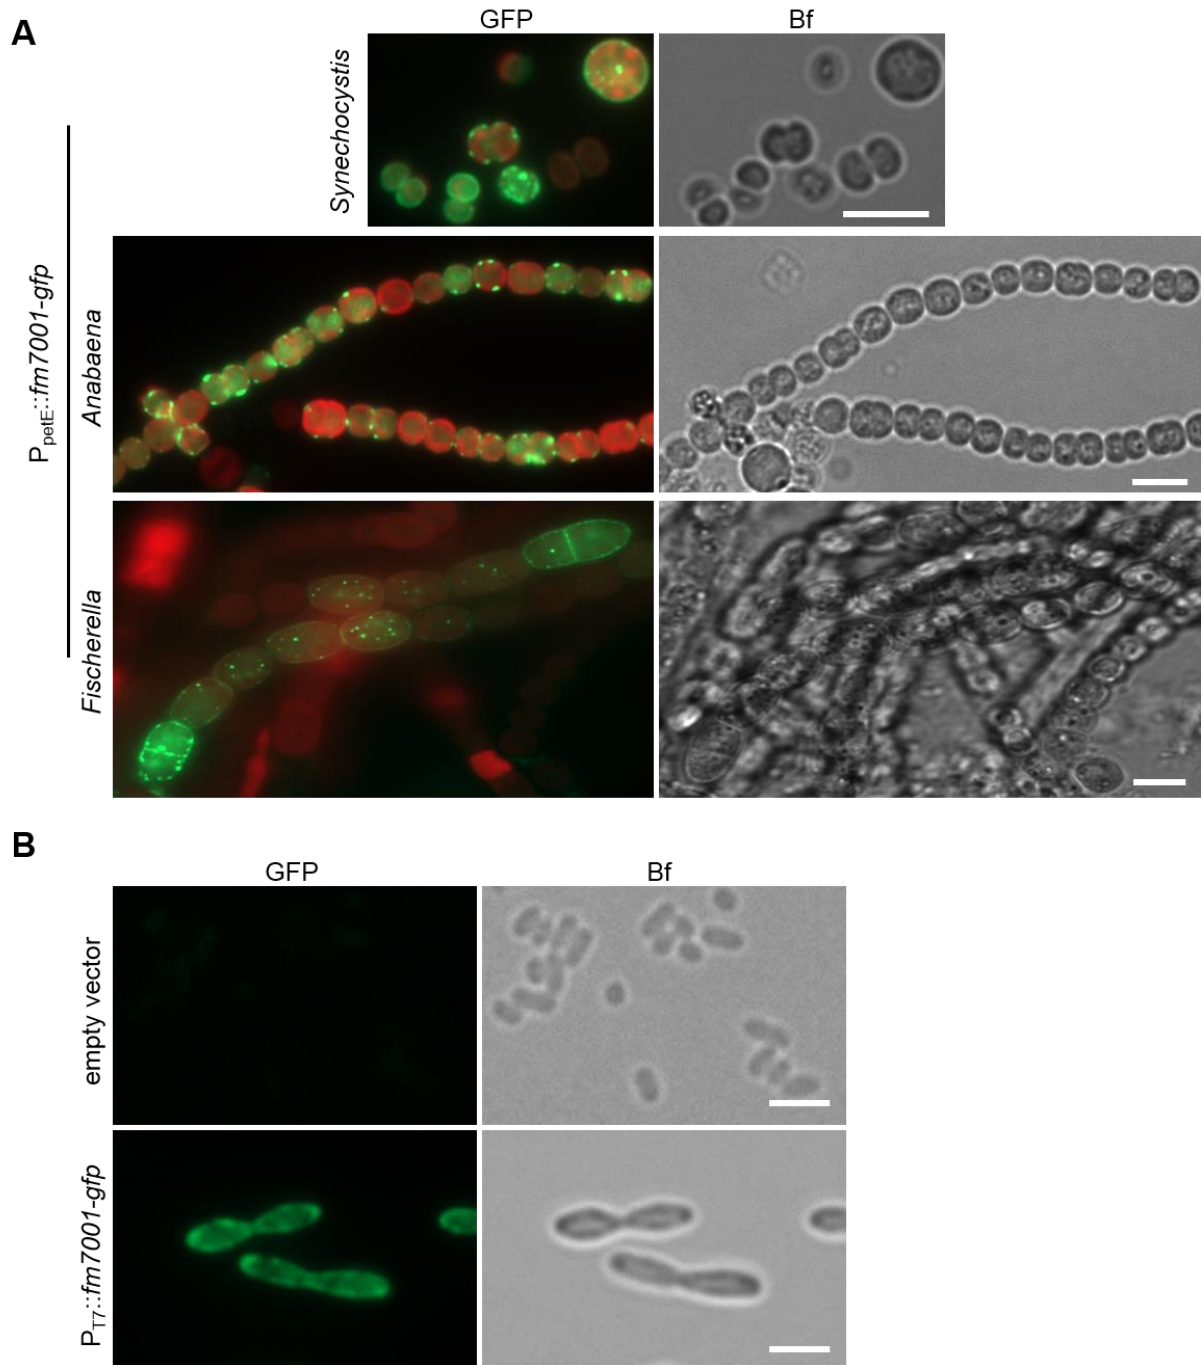

1135

1136 **Supplementary Fig. 6: Overexpression of Fm7001-GFP affects *E. coli* and *Synechocystis* cell shape**

1137 (A) Merged GFP fluorescence and chlorophyll autofluorescence (red) and bright field micrographs or (B) GFP  
1138 fluorescence and bright field micrographs *Synechocystis*, *Anabaena*, *Fischerella* and *E. coli* BL21 (DE3) cells  
1139 expressing Fm7001-GFP. No in vivo filaments can be observed upon C-terminal fusion of Fm7001 with a GFP-tag  
1140 (B) *E. coli* cells were grown at 16 °C and protein expression was induced with 0.05 mM IPTG for 24 h. Scale bars:  
1141 (A) 5  $\mu$ m or (B) 2.5  $\mu$ m.

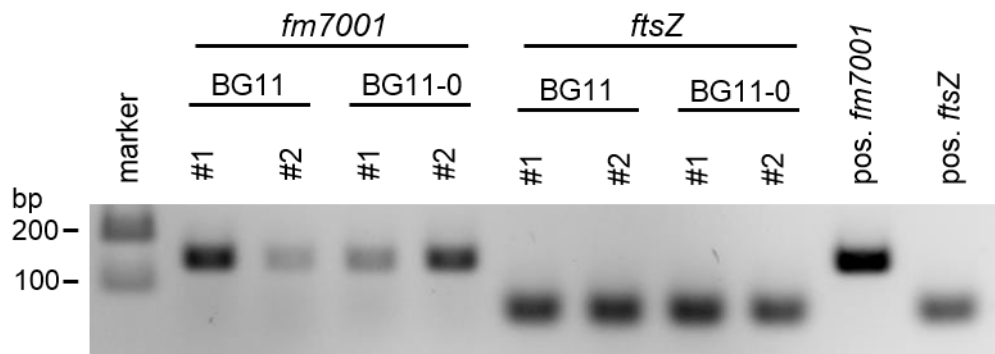

1142

1143 **Supplementary Fig. 7: *fm7001* is expressed in early growth stages**

1144 RT-PCR of reverse transcribed whole RNA from young *Fischerella* WT cultures grown in BG11 or BG11<sub>0</sub> at standard  
1145 growth conditions from two independent biological replicates. Gene transcripts were verified using internal *fm7001*  
1146 gene primers (#1/#2) or internal *ftsZ* gene primers (#3/#4), as a control. *Fischerella* genomic DNA was included as  
1147 positive control. PCR fragments were resolved on a 1% agarose gel in TAE buffer.

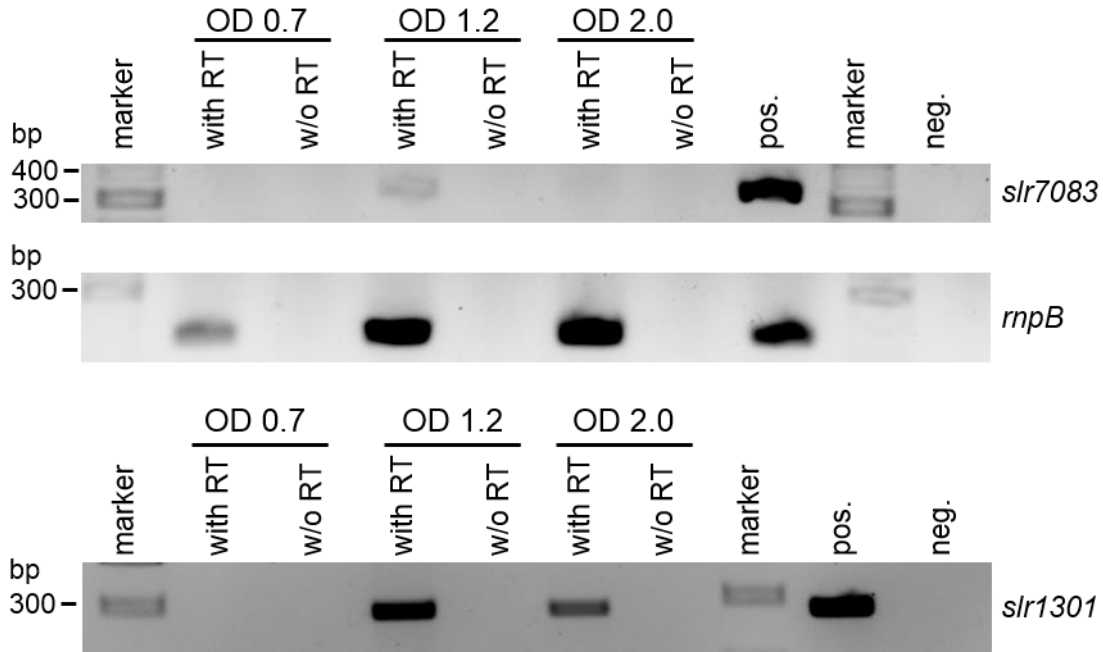

1148

1149 **Supplementary Fig. 8: Expression of *slr7083* and *slr1301***

1150 RT-PCR of reverse transcribed whole RNA from *Synechocystis* WT (OD<sub>750</sub> 0.7, 1.2 or 2.0) grown in BG11 at  
1151 standard growth conditions using internal *slr7083* gene primers (#5/#6) or internal *slr1301* gene primers (#9/#10).  
1152 Internal *rnpB* gene primers (#7/#8) were included as a positive control. RNA was either reverse transcribed in the  
1153 reaction buffer containing reverse transcriptase (with RT) or without reverse transcriptase (w/o RT) as a control for  
1154 residual genomic DNA contamination. *Synechocystis* genomic DNA was included as positive control. PCR  
1155 fragments were resolved on a 2% agarose gel in TAE buffer.

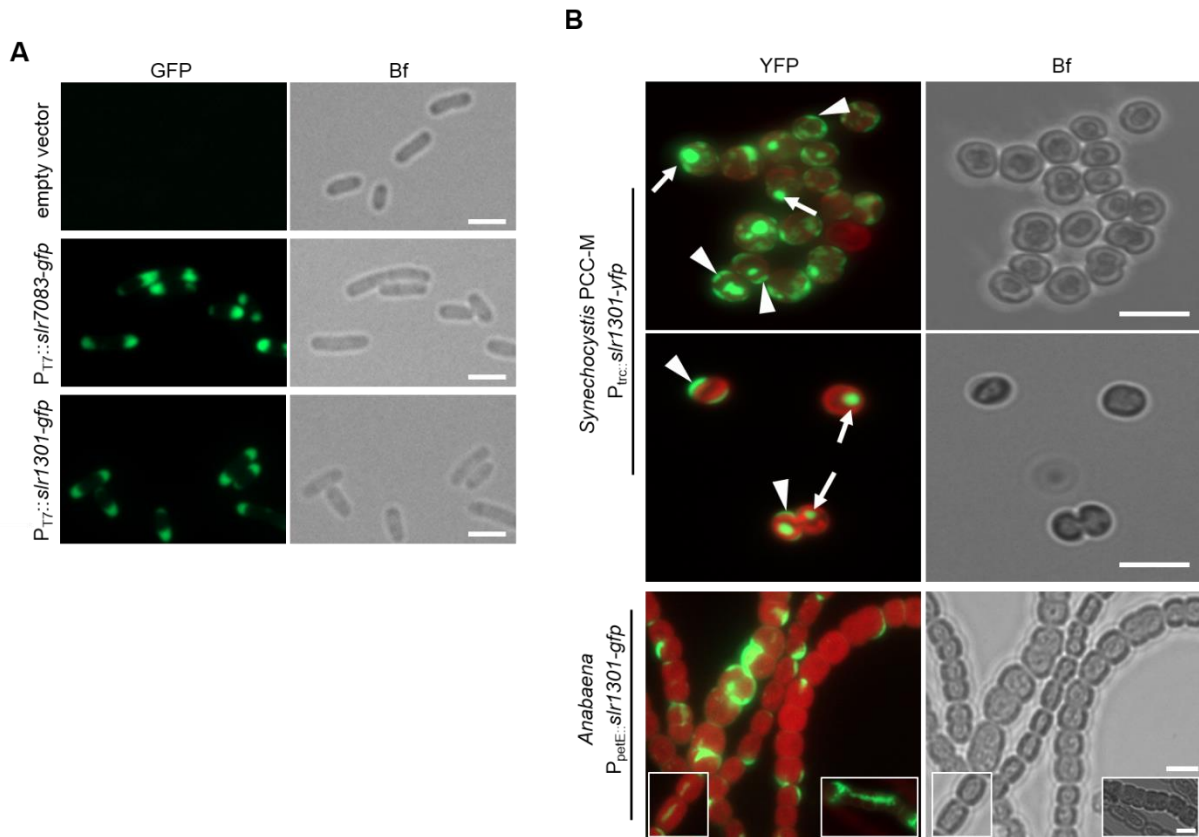

1156

1157 **Supplementary Fig. 9: *In vivo* localization of Slr7083 and Slr1301**

1158 (A) GFP fluorescence and bright field micrographs of *E. coli* BL21 (DE3) WT cells or *E. coli* BL21 (DE3) cells  
1159 expressing Slr7083-GFP or Slr1301-GFP from P<sub>T7</sub>. Cells were induced with 0.05 mM IPTG and grown at 20 °C for  
1160 5 h. (B) Merged GFP fluorescence and chlorophyll autofluorescence (red) and bright field micrographs of  
1161 *Synechocystis* cells expressing Slr1301-YFP from P<sub>trc</sub> or *Anabaena* cells expressing Slr1301-GFP from P<sub>petE</sub> grown  
1162 on BG11 plates. Besides intracellular filaments (figure inlays), Slr1303 formed large plugs or sheets within the cells  
1163 and induced a partial swollen cell phenotype. White triangles mark crescent-like localizations. White arrows show  
1164 Slr1301-YFP plugs. Scale bars: (A) 2.5 μm or (B) 5 μm.

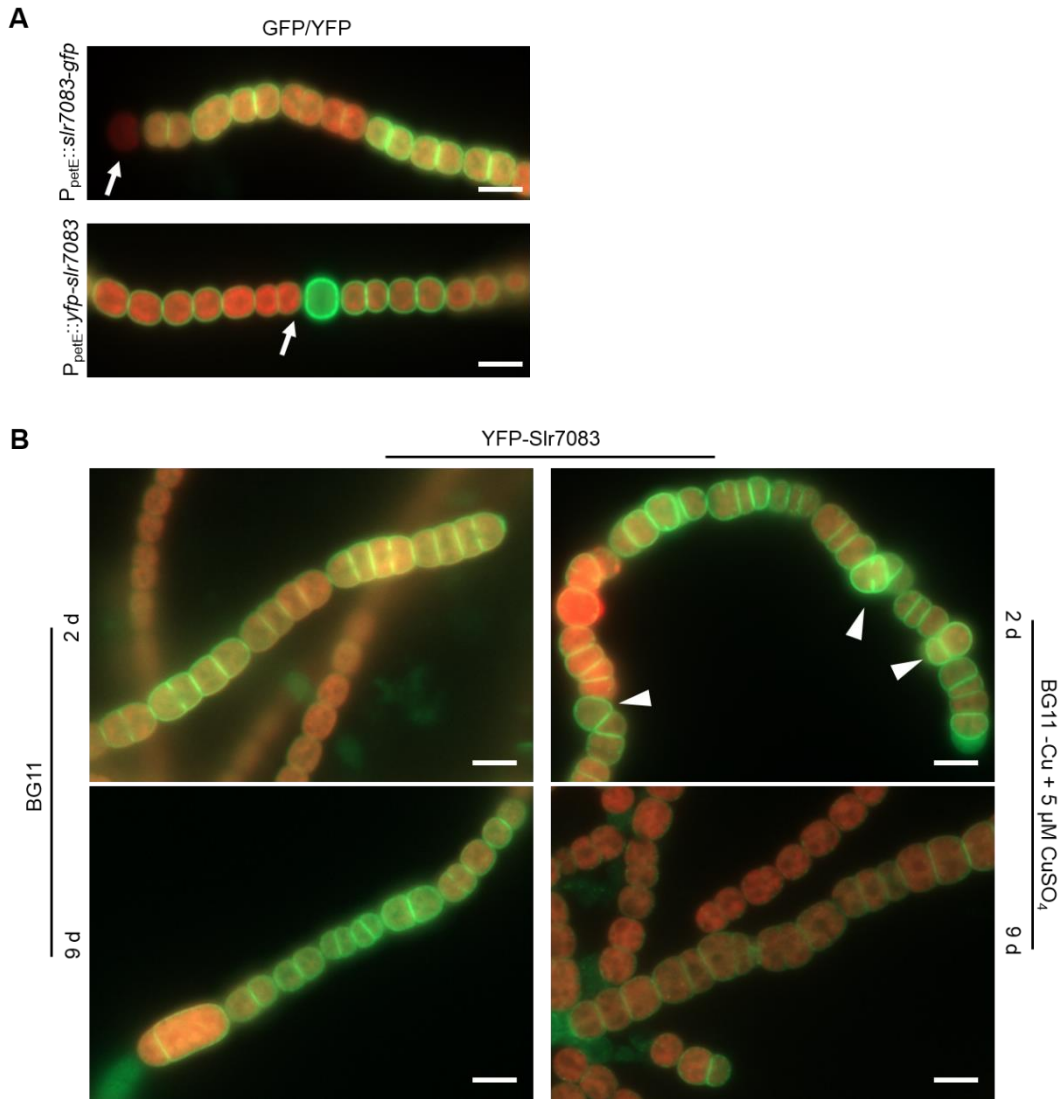

1165

1166 **Supplementary Fig. 10: Slr7083 affects cell morphology and linear growth in *Anabaena***

1167 (A,B) Merged GFP fluorescence and chlorophyll auto-fluorescence (red) micrographs of *Anabaena* cells expressing  
1168 (A) Slr7083-GFP or YFP-Slr7083 from P<sub>petE</sub> and grown on BG11-0 plates. (B) *Anabaena* cells expressing YFP-  
1169 Slr7083 from P<sub>petE</sub> in liquid BG11 or liquid BG11 without copper and induced with 5 μM CuSO<sub>4</sub> for 2 and 9 d. White  
1170 arrows indicate heterocysts. White triangles point to multiserial *Anabaena* filament growth. Scale bars: 5 μm

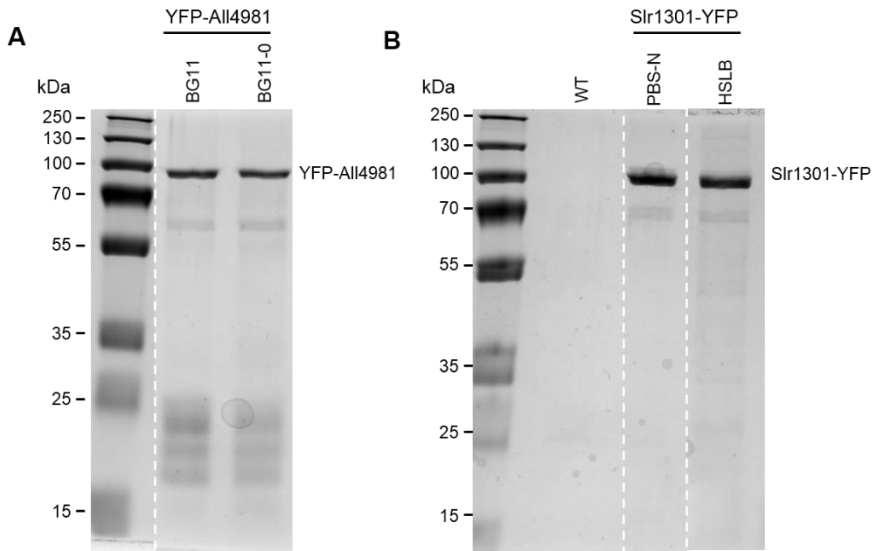

1171

1172 **Supplementary Fig. 11: Co-immunoprecipitation of CCRP candidates**

1173 Cell-free lysates of (A) *Anabaena* cells expressing YFP-All4981 from  $P_{petE}$  grown in BG11 or BG11-0 supplemented  
1174 with  $0.5 \mu\text{M}$   $\text{CuSO}_4$  for two days and (B) *Synechocystis* WT and *Synechocystis* cells expressing Slr1301-YFP from  
1175  $P_{trc}$  were subjected to co-immunoprecipitation using anti-GFP magnetic beads ( $\mu\text{MACS}$  GFP isolation Kit, Miltenyi  
1176 Biotec). Pooled duplicates of precipitated proteins of two independent experiments were analyzed by mass  
1177 spectrometry and  $25 \mu\text{l}$  of the precipitate were resolved in a 10% SDS-polyacrylamide gel and detected by Quick  
1178 Coomassie stain (Serva). *Anabaena* WT control samples grown in BG11 and BG11<sub>o</sub> were provided to the mass  
1179 spectrometry facility and not resolved on an SDS-polyacrylamide gel.

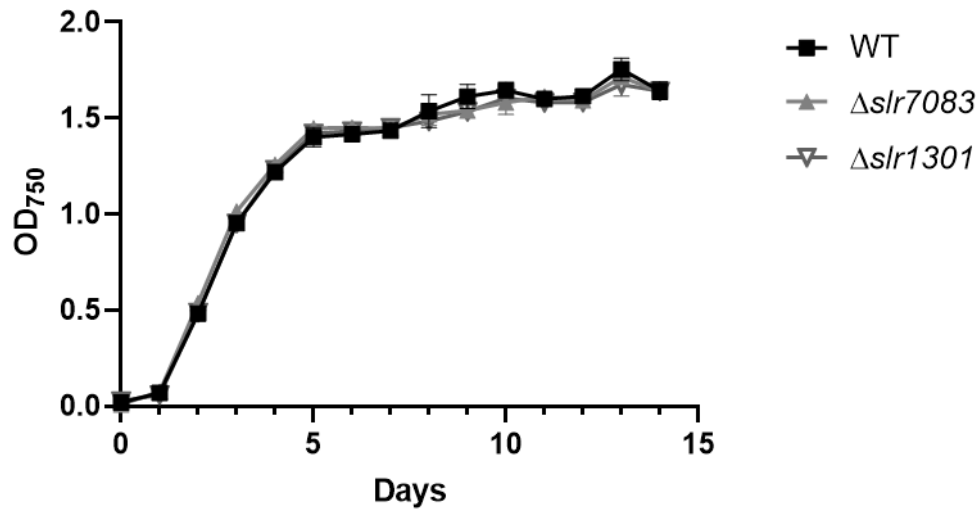

1180

1181 **Supplementary Fig. 12: Deletion of *slr7083* and *slr1301* do not affect *Synechocystis* viability**

1182 *Synechocystis* WT,  $\Delta slr7083$  and  $\Delta slr1301$  mutant strains were grown in BG11, adjusted to an OD<sub>750</sub> of 0.1 and  
1183 then grown in quadruples at standard growth conditions. OD<sub>750</sub> values were recorded once a day for 15 d. Error  
1184 bars show the standard deviation.

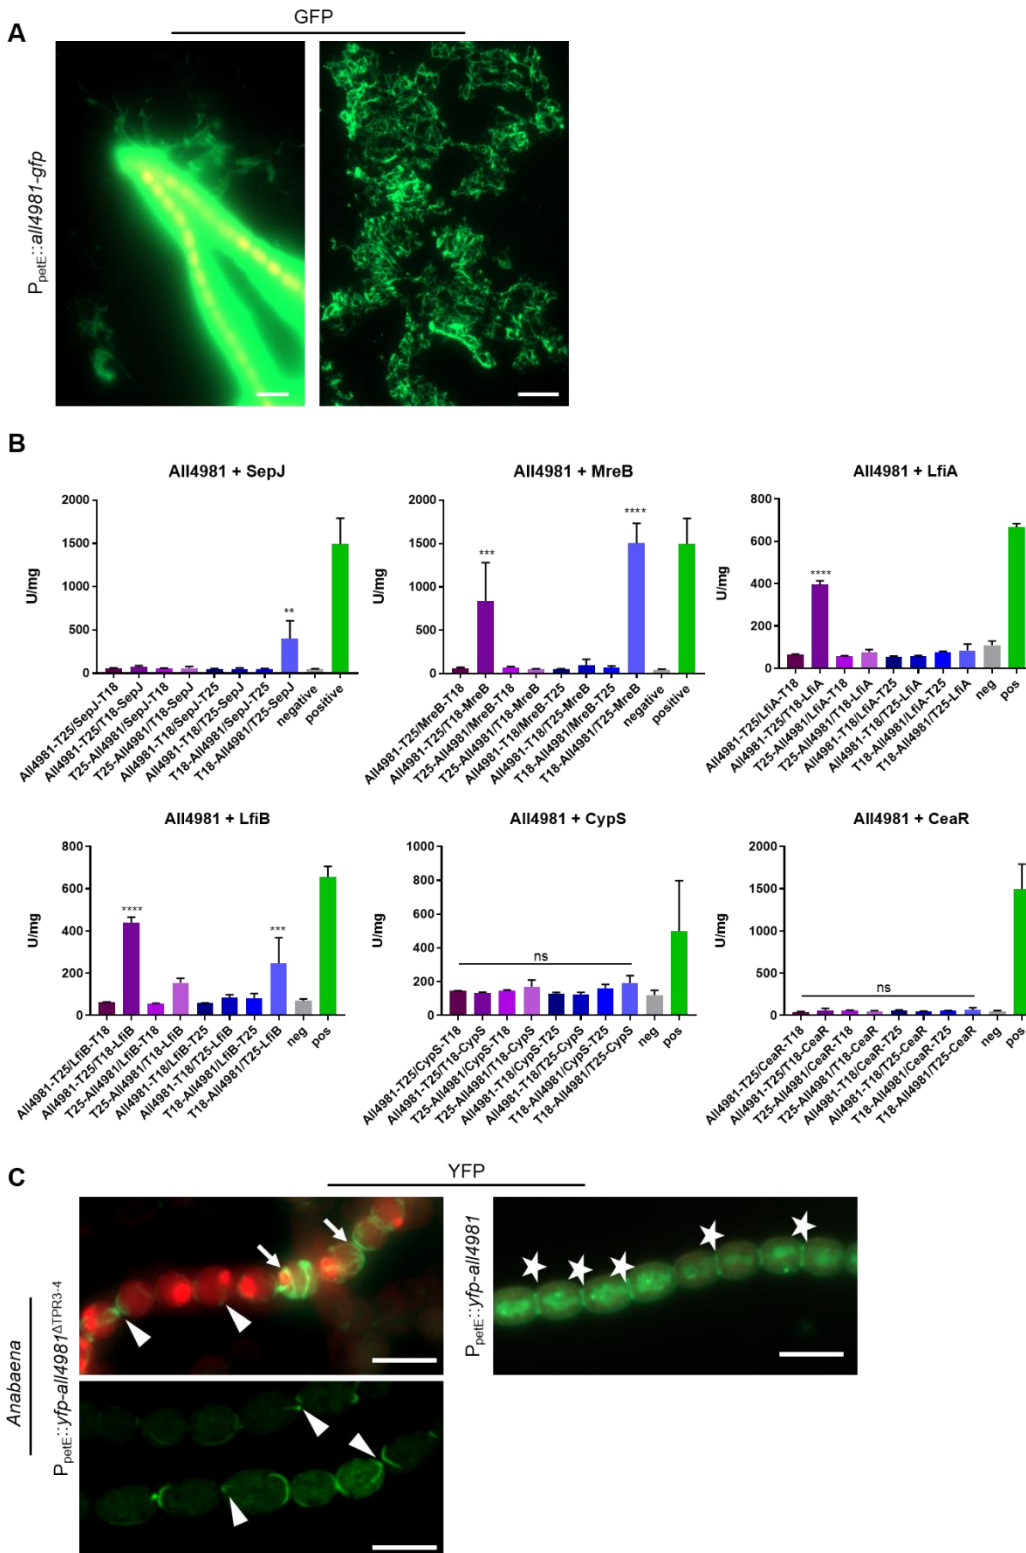

1185

1186 **Supplementary Fig. 13: All4981 assembles into extracellular filaments and interacts with SepJ, MreB and**  
 1187 **Anabaena CCRPs**

1188 (A) GFP fluorescence and bright field micrographs of *Anabaena* cells expressing All4981-GFP from  $P_{petE}$  grown in  
 1189 BG11 supplemented with  $0.5 \mu\text{M}$   $\text{CuSO}_4$  for 2 d. Extended period of overexpression of this construct then leads to  
 1190 cell lysis/rupture of a subpopulation of *Anabaena* filaments, releasing their internal components into the growth  
 1191 medium. Protein filaments released from the *Anabaena* filament are shown in the left image while the right GFP  
 1192 fluorescence image shows extracellular filaments observed in the growth medium. Notably, overexpression of YFP-  
 1193 All4981 $\Delta TPR3-4$  also induced cell lysis and extracellular filament formation but to a lesser degree. Scale bars: (left)



1194 10  $\mu\text{m}$  or (right) 20  $\mu\text{m}$ . **(B)** Beta-galactosidase assays (BACTH) of *E. coli* BTH101 cells co-expressing indicated  
1195 T25 and T18 translational fusions of all possible pair-wise combinations of All4981 with SepJ, MreB, LfiA, LfiB,  
1196 CypS and CeaR. *E. coli* cells carrying the respective plasmids were subjected to beta-galactosidase assay  
1197 described by Karimova et al. (2012) in triplicates from three independent colonies grown for 2 d at 20 °C. Quantity  
1198 values are given in Miller Units per milligram LacZ of the mean results from three independent colonies. Negative:  
1199 N-terminal T25 fusion construct of the respective protein co-transformed with empty pUT18C. Positive: Zip/Zip  
1200 control. Error bars indicate standard deviations. \*:  $P < 0.05$ , \*\*:  $P < 0.01$ , \*\*\*:  $P < 0.001$ , \*\*\*\*:  $P < 0.0001$  (Dunnett's  
1201 multiple comparison test and one-way ANOVA). **(C)** Merged GFP fluorescence and chlorophyll autofluorescence  
1202 (red) micrographs of *Anabaena* cells expressing YFP-All4981 $\Delta\text{T}^{\text{PR}3-4}$  or YFP-All4981 from  $P_{\text{petE}}$ . *Anabaena* cells  
1203 were grown in BG11-0 supplemented with 0.5  $\mu\text{M}$   $\text{CuSO}_4$ . White triangles indicate selected filaments traversing  
1204 through the cells. White arrows point to spindle-like YFP- All4981 $\Delta\text{T}^{\text{PR}3-4}$  filaments. White stars mark septal  
1205 localization. Scale bars: 5  $\mu\text{m}$

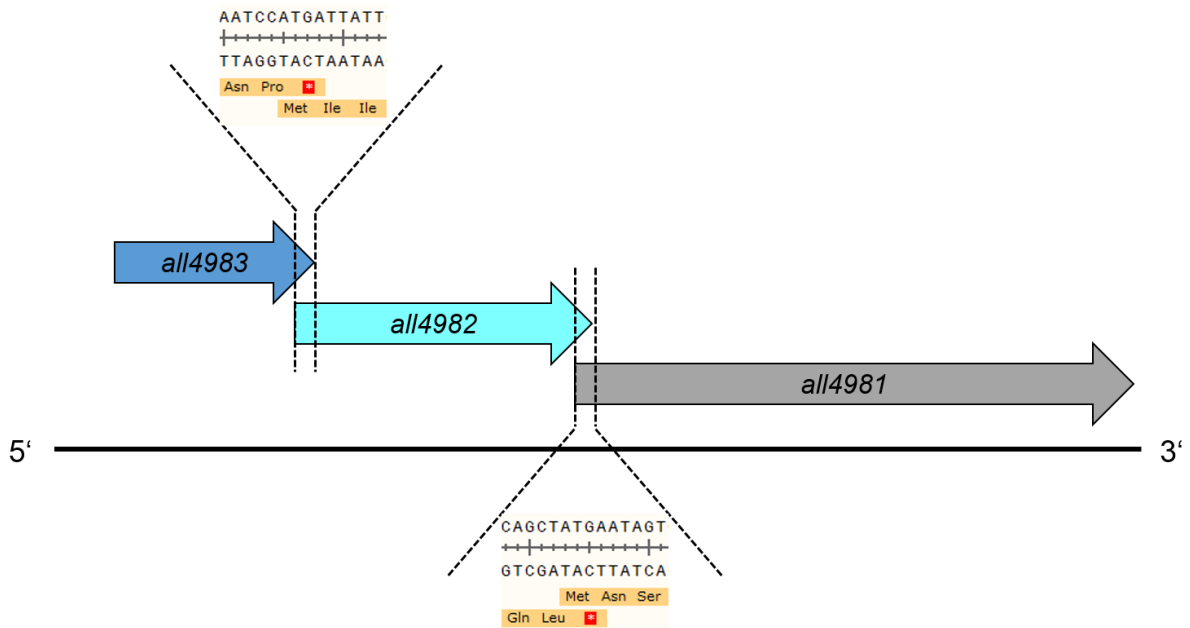

1206

1207 **Supplementary Fig. 14: *all4981* genomic environment**

1208 Schematic representation of the genomic context of All4981. The 3' end of *all4983* displays a 4 bp overlap to the 5'  
1209 region of *all4982*, which in turn has an overlap of 4 bp at its 3' end with the 5' end of *all4981*. In both cases, the  
1210 overlapping sequence is comprised of the same four nucleotides (ATGA), reminiscent of *segA* and *segB* from  
1211 *Sulfolobus solfataricus* (Kallioma-Sanford *et al.*, 2012). Notably, All4982 is predicted to belong to the large family  
1212 of P-loop NTPases that also comprises the bacterial-specific cytoskeletal class of Walker A Cytoskeletal ATPases  
1213 (Leipe *et al.*, 2002; Ingerson-Mahar and Gitai, 2012). Based on this buildup, it is conceivable that All4981, All4982  
1214 and All4983 share similar cellular functions.

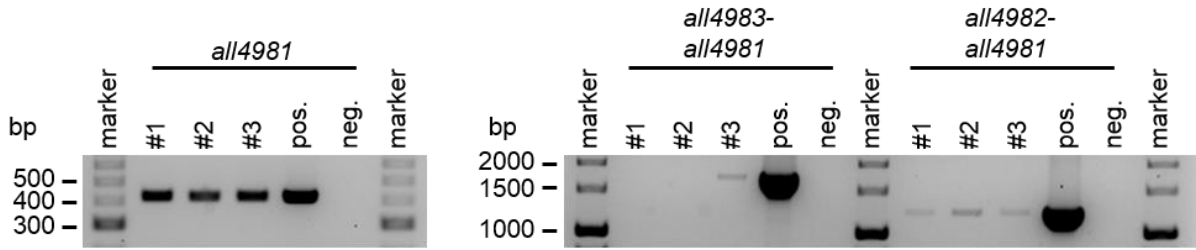

1215

1216 **Supplementary Fig. 15: *all4981* is transcribed in an operon with *all4982* and *all4983***

1217 RT-PCR of reverse transcribed whole RNA from *Anabaena* WT cultures grown in BG11 (OD<sub>750</sub> 1.8) at standard  
1218 growth conditions from three independent biological replicates. Gene and operon transcripts were verified using  
1219 internal *all4981* gene primers (#15/#16), internal *all4983* forward and internal *all4981* reverse gene primers  
1220 (#17/#16) as well as internal *all4982* forward and internal *all4981* reverse gene primers (#18/#16). Only one of three  
1221 replicates show a common transcript for all three genes, however, this likely is the result of the long fragment (about  
1222 1800 bp). The employed qScript cDNA SuperMix is optimized for fragments up to 1000 bp, thus making longer  
1223 reverse transcriptions unlikely. As a positive control, *Anabaena* genomic DNA was included. PCR fragments were  
1224 resolved on a 2% (left) or 0.7% (right) agarose gel in TAE buffer.

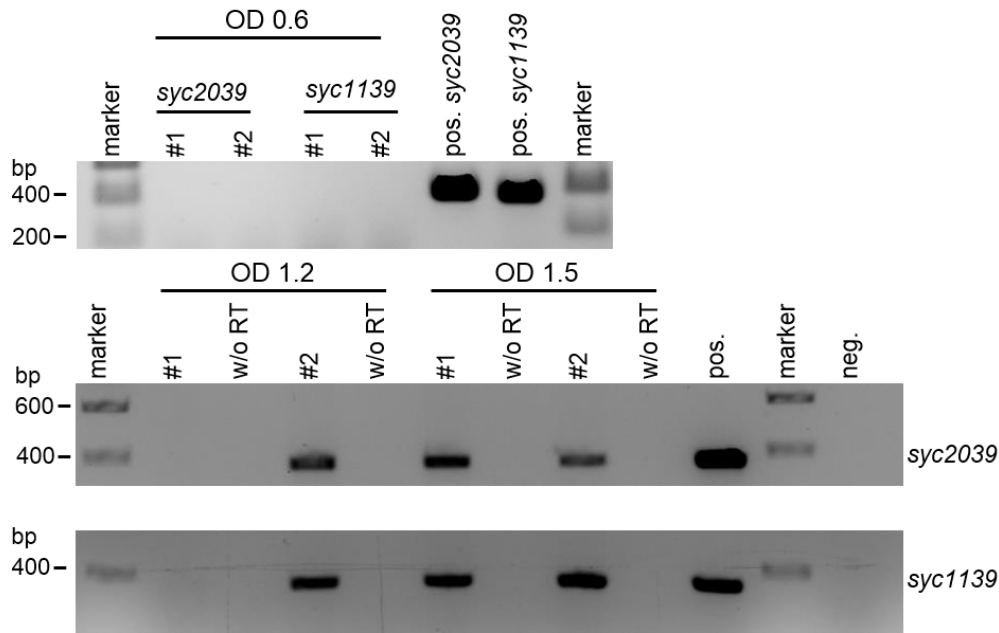

1225

1226 **Supplementary Fig. 16: *Synechococcus* CCRPs are expressed at exponential growth phase**

1227 RT-PCR of reverse transcribed whole RNA from *Synechococcus* WT (OD<sub>750</sub> 0.6, 1.2 or 1.5) grown in BG11 at  
1228 standard growth conditions from two independent biological replicates (#1 and #2). Gene transcripts were verified  
1229 using internal *syc2039* gene primers (#11/#12) and internal *syc1139* gene primers (#13/#14). RNA was either  
1230 reverse transcribed in the reaction buffer containing reverse transcriptase (#1 and #2) or without reverse  
1231 transcriptase (w/o RT) as a control for residual genomic DNA contamination. *Synechococcus* genomic DNA was  
1232 included as positive control. PCR fragments were resolved on a 2% agarose gel in TAE buffer.

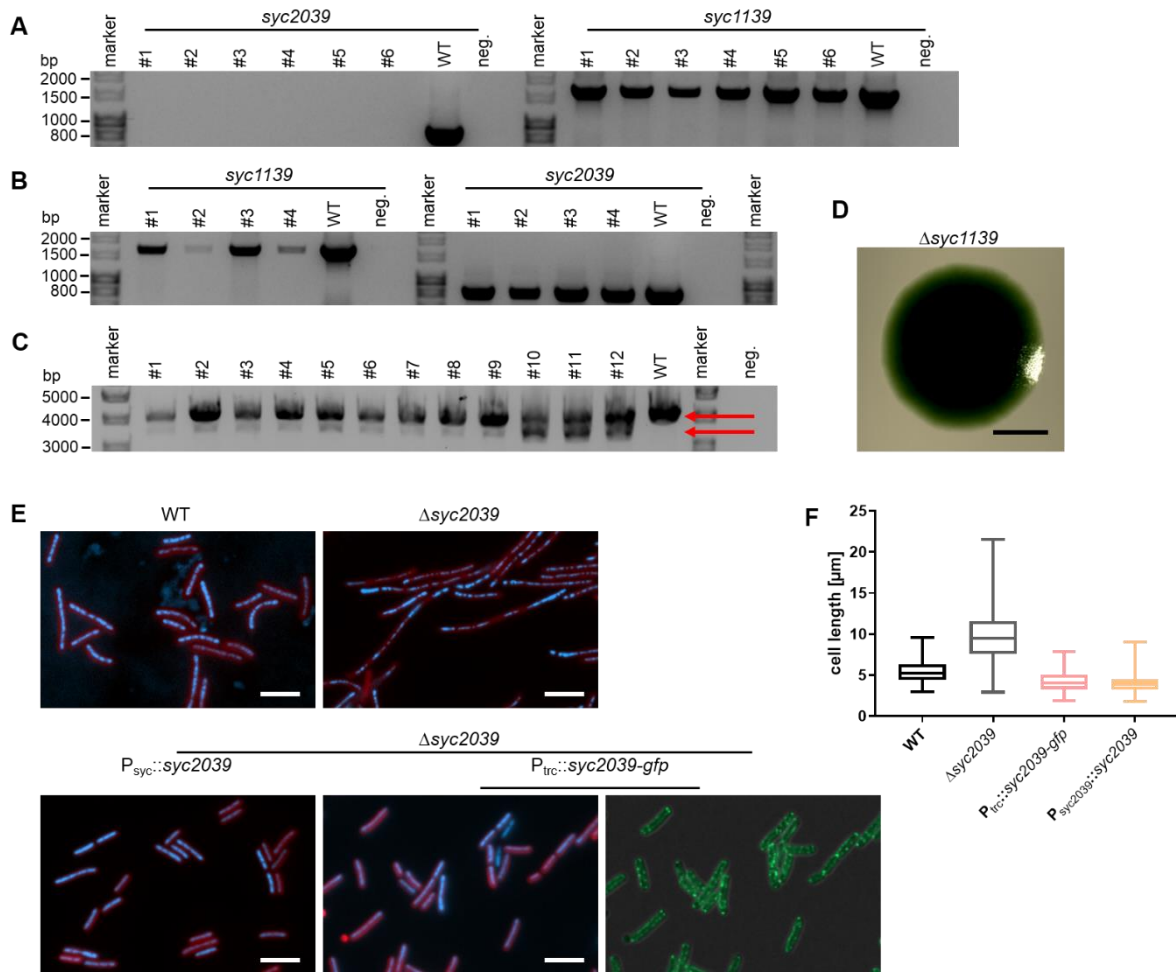

1233

1234 **Supplementary Fig. 17: Verification of *Synechococcus* CCRP mutants**

1235 (A) Colony PCR of six  $\Delta syc2039$  mutant clones using *syc2039* gene primers (#149/#147) and *syc1139* gene primers  
 1236 (#161/#162) as a control. (B) Colony PCRs of four non-segregated  $\Delta syc1139$  mutant clones using *syc1139* gene  
 1237 primers (#174/#175) or *syc2039* gene primers (#159/#160) as a control. (C) Colony PCR of twelve non-segregated  
 1238  $\Delta syc1139$  mutant clones using primers encompassing the homologous flanking regions used for homologous  
 1239 recombination (#238/#239). Upper red arrow indicates WT allele PCR product. Lower red arrow indicates  $\Delta syc1139$   
 1240 mutant PCR product. As a positive control, *Synechococcus* genomic DNA was included. (D) Growth of  $\Delta syc1139$   
 1241 on non-selective plates leads to a reversal to WT phenotype. (E) Merged DAPI fluorescence and chlorophyll  
 1242 autofluorescence (red) and merged GFP fluorescence and bright field micrographs of *Synechococcus* WT,  
 1243  $\Delta syc2039$  mutant strain and  $\Delta syc2039$  mutant complemented with  $P_{syc}::syc2039$  or  $P_{trc}::syc2039-gfp$  inserted into  
 1244 the neutral NS1 locus. Cells were grown in BG11 or BG11 supplemented with 0.001 mM IPTG (for strain carrying  
 1245  $P_{trc}::syc2039-gfp$ ) and stained with  $10 \mu g ml^{-1}$  DAPI. (F) Cell length of *Synechococcus* WT (n=505),  $\Delta syc2039$   
 1246 (n=517),  $\Delta syc2039$  carrying  $P_{trc}::syc2039-gfp$  (n=547) and  $\Delta syc2039$  carrying  $P_{syc2039}::syc2039$  (n=529) cells  
 1247 measured using Fiji software.

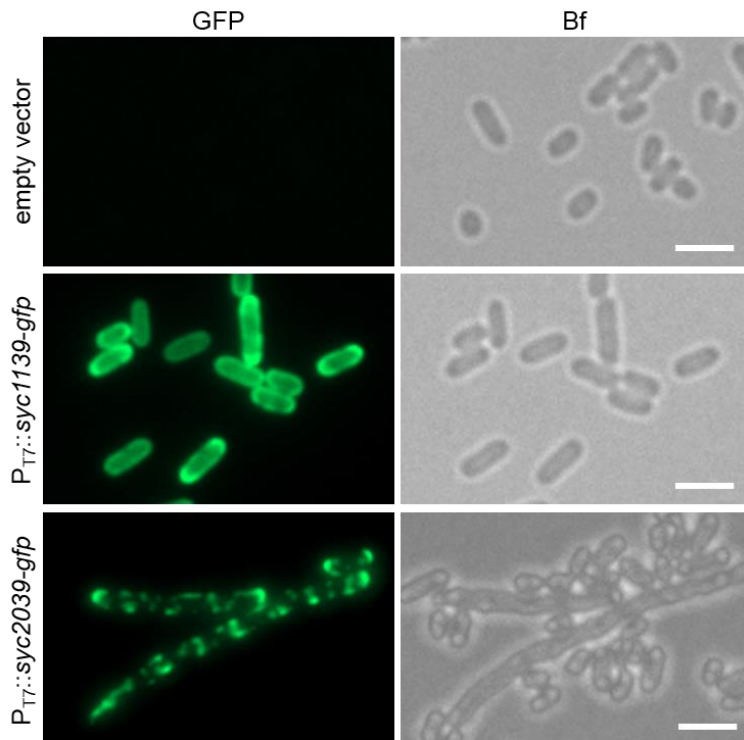

1248

1249 **Supplementary Fig. 18: Localization of *Synechococcus* CCRPs in *E. coli***

1250 GFP fluorescence and bright field micrographs of *E. coli* BL21 (DE) WT cells or *E. coli* BL21(DE3) cells expressing  
1251 Syc1139-GFP or Syc2039-GFP. Proteins were expressed at 20 °C with 0.05 mM IPTG for 24 h. Micrograph showing  
1252 Syc2039-GFP expression is a maximum intensity projection of a Z-stack. Scale bars: 2.5 μm.

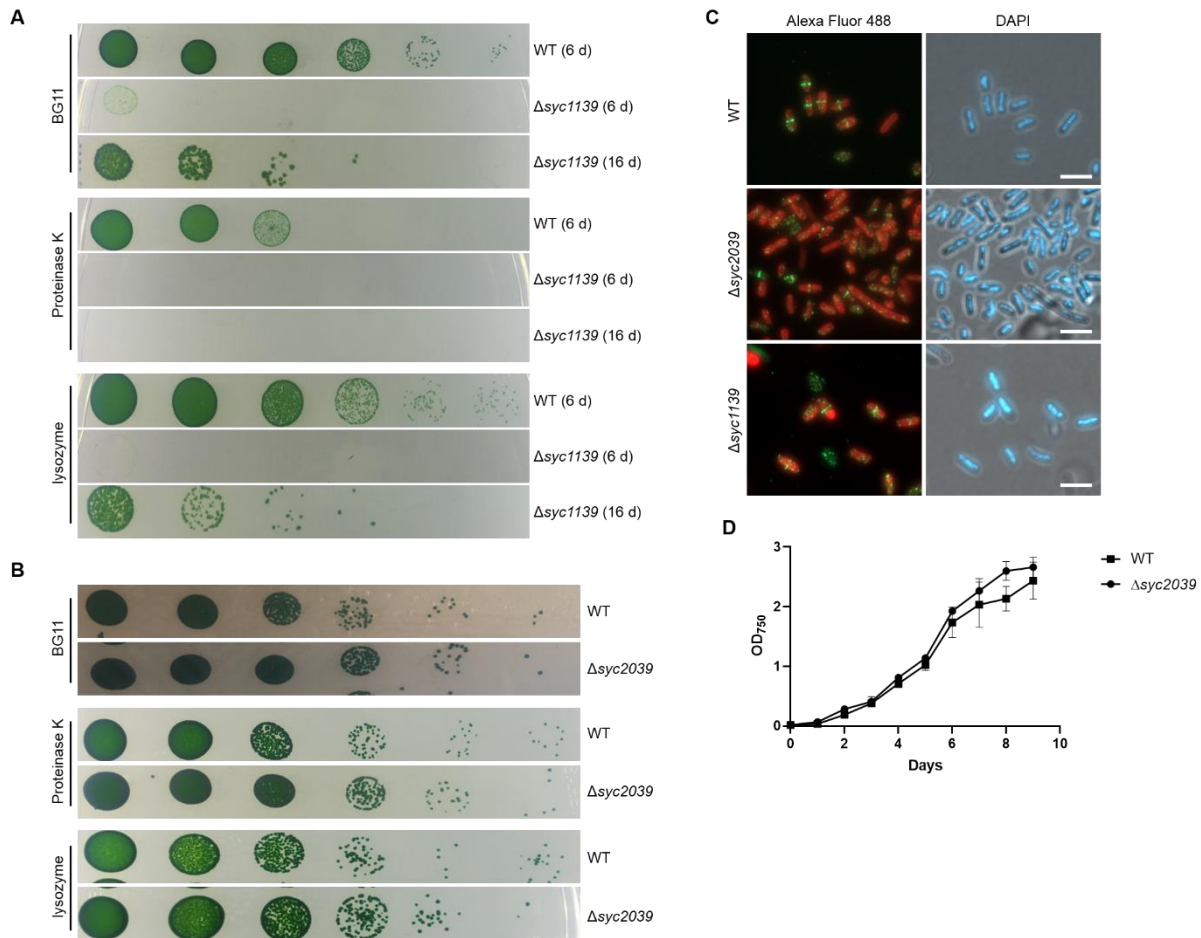

1253

1254

### Supplementary Fig. 19: Phenotypic characterization of *Synechococcus* mutant strains

1255 (A) *Synechococcus* WT (upper lane, after 6 days) and non-segregated  $\Delta syc1139$  mutant (middle lane: after 6 days  
 1256 and lower lane after 16 days) strains were grown on BG11 plates or BG11 plates supplemented with 50  $\mu\text{g ml}^{-1}$  Km.  
 1257 Cells were resuspended in BG11, adjusted to an OD<sub>750</sub> of 0.4 and spotted in triplicates of serial 10-fold dilutions on  
 1258 BG11 plates or BG11 plates supplemented with 100  $\mu\text{g ml}^{-1}$  Lysozyme or 50  $\mu\text{g ml}^{-1}$  Proteinase K. Cells were grown  
 1259 until no further colonies arose in the highest dilution. (B) *Synechococcus* WT and  $\Delta syc2039$  mutant strains were  
 1260 grown in liquid culture at standard growth conditions until an OD<sub>750</sub> of about 2.0, diluted in BG11 to an OD<sub>750</sub> of 0.4  
 1261 and spotted in triplicates of serial 10-fold dilutions on BG11 plates or BG11 plates supplemented with 100  $\mu\text{g ml}^{-1}$   
 1262 Lysozyme or 30  $\mu\text{g ml}^{-1}$  Proteinase K. Cells were grown until no further colonies arose in the highest dilution. (C)  
 1263 Merged Alexa Fluor-488 fluorescence and chlorophyll autofluorescence (red) and merged bright field and DAPI  
 1264 fluorescence micrographs of *Synechococcus* WT,  $\Delta syc2039$  or non-segregated  $\Delta syc1139$  mutant strains grown on  
 1265 BG11 plates and subjected to immunofluorescence staining using an anti-FtsZ primary antibody (Agrisera, raised  
 1266 against *Anabaena* FtsZ) and an Alexa Fluor-488 coated secondary antibody. Cells were mounted in Prolong  
 1267 Diamond antifade mountant with DAPI (Thermo Fischer Scientific). (D) *Synechococcus* WT and  $\Delta syc2039$  mutant  
 1268 strain were grown in BG11, adjusted to an OD<sub>750</sub> of 0.1 and then grown in triplicates at standard growth conditions.  
 1269 OD<sub>750</sub> values were recorded once a day for 10 d. Error bars show the standard deviation. Scale bars: 5  $\mu\text{m}$ .

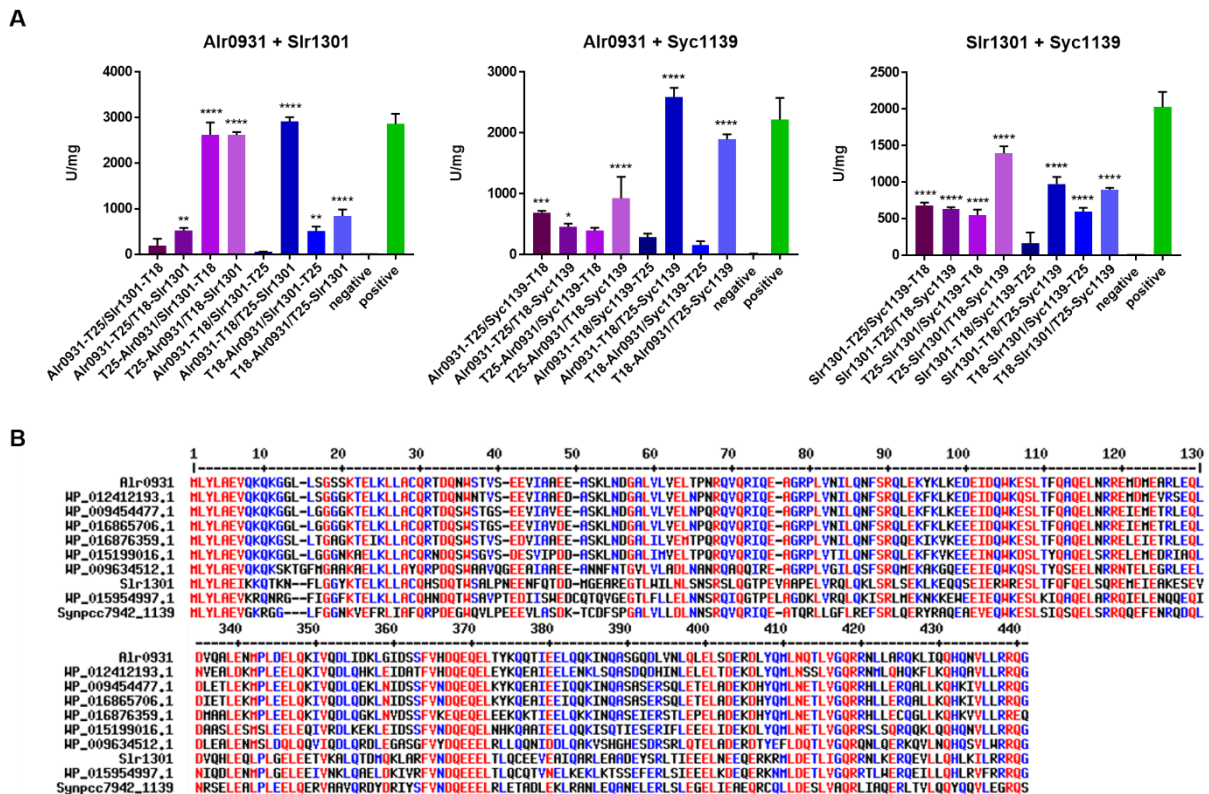

1270

1271

### Supplementary Fig. 20: Interaction of cyanobacterial CCRP homologs

1272

1273

1274

1275

1276

1277

1278

1279

1280

1281

1282

1283

1284

1285

1286

1287

1288

1289

1290

1291

1292

(A) Beta-galactosidase assays (BACTH) of *E. coli* BTH101 cells co-expressing indicated T25 and T18 translational fusions of all possible pair-wise combinations of Alr0931 (CypS), Slr1301 and Syc1139. *E. coli* cells carrying the respective plasmids were subjected to beta-galactosidase assay described by (Karimova, Davi and Ladant, 2012) in triplicates from three independent colonies grown for 1 d at 30 °C. Quantity values are given in Miller Units per milligram LacZ of the mean results from three independent colonies. Negative: N-terminal T25 fusion construct of the respective protein co-transformed with with empty pUT18C. Positive: Zip/Zip control. Error bars indicate standard deviations. \*:  $P < 0.05$ , \*\*:  $P < 0.01$ , \*\*\*:  $P < 0.001$ , \*\*\*\*:  $P < 0.0001$  (Dunnett's multiple comparison test and one-way ANOVA). (B) Multiple sequence alignment of selected cyanobacterial homologous CCRPs using MULTALIGN (Corpet, 1988) with default settings and sorted according to relatedness. Alr0931 (termed CypS; *Anabaena*), Slr1301 (*Synechocystis*) and Synpcc7942\_1139 (*Synechococcus*) are identified by their designated cyanobase locus tag. Other proteins are given as NCBI accession numbers. WP\_012412193.1 (*Nostoc punctiforme* PCC 73102), WP\_009454477.1 (*Fischerella thermalis* PCC 7521), WP\_016865706.1 (*Fischerella*), WP\_016876359.1 (*C. fritschii* PCC 9212), WP\_015199016.1 (*Calothrix* sp. PCC 6303), WP\_009634512.1 (*Synechocystis* sp. PCC 7509), and WP\_015954997.1 (*Cyanothece* sp. PCC 7424). Amino acids from 1-130 and 334-441 are depicted. Red highlighted amino acid residues are conserved among all listed species while amino acid residues highlighted in blue are mostly conserved. Amino acids depicted in black are not conserved. Characteristic for this group of conserved cyanobacterial CCRPs is a highly conserved N-terminus with a M-L-Y-L-A-E-V sequence motif present in nearly all homologs, followed by a moderately conserved N-terminal region of the first 120 amino acids. Two other highly conserved domains are present in this group, one located around the centre of the proteins (between the 340<sup>th</sup> and 370<sup>th</sup> amino acid), and another one shortly thereafter between the 400<sup>th</sup> and 420<sup>th</sup> amino acid.



Supplementary Table 1: Properties of cyanobacterial CCRPs

| Gene /Locus tag   | Genus                          | Subsection | Homologs distribution | Predicted proteins of similar structure (I-TASSER)                  | Homolog similarities | Conserved domains                                     | Others                                                     |
|-------------------|--------------------------------|------------|-----------------------|---------------------------------------------------------------------|----------------------|-------------------------------------------------------|------------------------------------------------------------|
| <i>crescentin</i> | <i>C. crescentus</i>           | n/a        | n/a                   | Cytoplasmic domain of bacterial cell division protein EzrA          |                      | SMC, CCDC158                                          | Validated IF-like protein                                  |
| <i>filP</i>       | <i>Streptomyces coelicolor</i> | n/a        | n/a                   | Dynein tail; $\alpha$ -Actinin; Tropomyosin                         |                      | DUF3552, SMC, RNase_Y                                 | Validated IF-like protein                                  |
| <i>desmin</i>     | <i>Homo sapiens</i>            | n/a        | n/a                   | PI4KIIIa lipid kinase                                               |                      | Filament (pfam00038), SMC, Spc7, MscS_TM              | IF protein                                                 |
| <i>vimentin</i>   | <i>Homo sapiens</i>            | n/a        | n/a                   | PI4KIIIa lipid kinase                                               |                      | Filament (pfam00038), SMC, Spc7                       | IF protein                                                 |
| <i>syc2039</i>    | <i>Synechococcus</i>           | I          | I                     | Tropomyosin                                                         |                      | SMC, MukB, CALCOCO1                                   | N-terminal TMD; only in <i>Synechococcus</i> sp.           |
| <i>syc1139</i>    | <i>Synechococcus</i>           | I          | I, II, III, IV, V     | Cytoplasmic domain of bacterial cell division protein EzrA          | 39%                  | SMC, MukB, Spc7                                       | Homolog to <i>slr1301</i>                                  |
| <i>slr6096</i>    | <i>Synechocystis</i>           | I          | I, III, IV            | Cytoplasmic domain of bacterial cell division protein EzrA          |                      | SMC                                                   |                                                            |
| <i>slr7083</i>    | <i>Synechocystis</i>           | I          | I                     | Plectin                                                             |                      | SMC, MscS_TM                                          | Encoded on pSYSA plasmid, only in <i>Synechocystis</i> sp. |
| <i>slr1301</i>    | <i>Synechocystis</i>           | I          | I, II, III, IV, V     | Cytoplasmic domain of bacterial cell division protein EzrA          | 39%                  | SMC, SbcC, APG6, DUF3552                              | Homolog to <i>syc1139</i>                                  |
| <i>tlr0420</i>    | <i>BP-1</i>                    | I          | I, III                | Plectin                                                             |                      | SMC, MscS_TM                                          |                                                            |
| <i>fm7001</i>     | <i>Fischerella</i>             | V          | IV, V                 | $\alpha$ -catenin or vinculin; similarity to acyl-CoA dehydrogenase | 63%                  | Acetyl-CoA carboxylase carboxyl transferase (PLN0322) | Highly expressed; 3' end 9 bp overlap to <i>fm7000</i>     |
| <i>fm6009</i>     | <i>Fischerella</i>             | V          | V                     | Structure of $\beta$ -catenin and HTCF-4                            |                      | COG0610                                               |                                                            |
| <i>all4981</i>    | <i>Anabaena</i>                | IV         | III, IV, V            | TTC7B/Hyccin Complex, Clathrin                                      | 47%                  | TPR                                                   | 5' with a 4 bp overlap to <i>all4982</i>                   |

1294 The first column indicates the respective gene name or locus tags of each protein candidate. The second and third column indicate the respective subsection of the corresponding  
1295 cyanobacterial genus. Column four lists the subsections that contain homologous proteins to the respective CCRP. Column five indicates structural similarities of the candidate to  
1296 proteins in the Protein Data Bank (PDB) based on I-TASSER (Zhang, 2009; Yang and Zhang, 2015). The sixth column lists predicted sub-domains of protein candidates identified  
1297 by BLAST Conserved Domain Search. Column seven names other features of interest. Abbreviations: (TMH) Transmembrane helix; (DUF) Domain of unknown function; (CCDC158)  
1298 Coiled-coil domain-containing protein 158; (SMC) Structural maintenance of chromosomes; (MukB) The hinge domain of chromosome partition protein MukB; (APG6) Autophagy  
1299 protein Apg6, (SbcC) DNA repair exonuclease SbcCD ATPase; (CALCOCO1) Calcium binding and coiled-coil domain; (Spc7) Spc7 kinetochore protein; (Filament) Intermediate  
1300 filament protein; (TPR): Tetratricopeptide repeat; (PLN0322) Acetyl-CoA carboxylase carboxyl transferase; (COG0610) Type I site-specific restriction-modification system. *Anabaena*  
1301 CCRPs CypS, LfiB, CeaR, Alr4393 and All4935 (Springstein *et al.*, 2019) also revealed structural similarities to EzrA. n/a: not applicable.

1302 **Supplementary Table 2: Employed E. coli strains**

| Strain     | Genotype                                                                                                                                                                                               | Resistance | Reference                        |
|------------|--------------------------------------------------------------------------------------------------------------------------------------------------------------------------------------------------------|------------|----------------------------------|
| XL1 blue   | <i>endA1 gyrA96(nal<sup>R</sup>) thi-1 recA1 relA1 lac glnV44 F'[::Tn10 proAB<sup>+</sup> lacI<sup>f</sup> Δ(lacZ)M15] hsdR17(r<sub>K</sub><sup>-</sup> m<sub>K</sub><sup>+</sup>)</i>                 | Tet        | Stratagene                       |
| HB101      | <i>F<sup>-</sup> mcrB mrr hsdS20(r<sub>B</sub><sup>-</sup> m<sub>B</sub><sup>-</sup>) recA13 leuB6 ara-14 proA2 lacY1 galk2 xyl-5 mtl-1 rpsL20(Sm<sup>R</sup>) glnV44 λ<sup>-</sup></i>                | Sm         | Boyer and Roulland-Dessoix, 1969 |
| DH5α       | <i>F<sup>-</sup> Φ80lacZΔM15 Δ(lacZYA-argF) U169 recA1 endA1 hsdR17 (r<sub>K</sub><sup>-</sup>, m<sub>K</sub><sup>+</sup>) phoA supE44 λ<sup>-</sup> thi-1 gyrA96 relA1</i>                            |            | (Meselson and Yuan, 1968)        |
| DH5αMCR    | <i>F<sup>-</sup> endA1 supE44 thi-1 λ<sup>-</sup> recA1 gyrA96 relA1 deoR Δ(lacZYA-argF)U169 Φ80dlacZΔM15 mcrA Δ(mrr hsdRMS mcrBC)</i>                                                                 |            | Grant <i>et al.</i> , 1990       |
| BL21 (DE3) | <i>F<sup>-</sup> ompT gal dcm lon hsdS<sub>B</sub>(r<sub>B</sub><sup>-</sup> m<sub>B</sub><sup>-</sup>) λ(DE3 [lacI lacUV5-T7p07 ind1 sam7 nin5]) [malB<sup>+</sup>]<sub>K-12</sub>(λ<sup>S</sup>)</i> |            | Studier and Moffatt, 1986        |
| BTH101     | <i>F<sup>-</sup>, cya-99, araD139, galE15, galk16, rpsL1 (Str<sup>r</sup>), hsdR2, mcrA, mcrB1</i>                                                                                                     | Sm         | Euromedex                        |

1303

1304 **Supplementary Table 3: Cyanobacterial strains**

| Strain                                  | Description                                           | Resistance | Reference                                                 |
|-----------------------------------------|-------------------------------------------------------|------------|-----------------------------------------------------------|
| <i>Fischerella muscicola</i> PCC 7414   | WT                                                    |            | Pasteur culture collection of cyanobacteria (PCC), France |
| <i>Synechocystis</i> sp. PCC 6803       | Glucose tolerant Kazusa substrain WT                  |            | PCC, France                                               |
| BLS4                                    | Δ <i>slr1301::nptII</i>                               | Km         | This study                                                |
| BLS5                                    | Δ <i>slr7083::nptII</i>                               | Km         | This study                                                |
| <i>Synechocystis</i> sp. PCC-M 6803     | Glucose tolerant and motile Moscow PCC-M substrain WT |            | A gift from Annegret Wilde (University of Freiburg)       |
| BLS6                                    | Δ <i>slr1301::CS.3</i>                                | Sm,Sp      |                                                           |
| BLS7                                    | Δ <i>slr7083::CS.3</i>                                | Km         | This study                                                |
| <i>Synechococcus elongatus</i> PCC 7942 | WT                                                    |            | A gift from Martin Hagemann (University of Rostock)       |
| BLS8                                    | Non-segregated Δ <i>syc2039::nptII</i>                | Km         | This study                                                |
| BLS9                                    | Δ <i>syc2039::nptII</i>                               | Km         | This study                                                |
| <i>Anabaena</i> sp. PCC 7120            | WT                                                    |            | PCC, France                                               |

1305

1306 **Supplementary Table 4: Employed oligonucleotides**

| #  | Given name                        | Sequence 5' -> 3'        | Purpose                                 |
|----|-----------------------------------|--------------------------|-----------------------------------------|
| 1  | Fm7001_intern_A                   | AGCGGGAAGATGGCTACTATC    | RT-PCR                                  |
| 2  | 7001_northern                     | TCTGCGGCTTGACTTGATAC     | RT-PCR                                  |
| 3  | ftsZ 7414 primer fwd              | TGGAATAAAGCTGCCGAGG      | RT-PCR                                  |
| 4  | ftsZ 7414 primer rev              | CTGTACCAGTTCACCACCC      | RT-PCR                                  |
| 5  | Syn017_intern_A                   | TGCAACAGCAAACGGAACAG     | RT-PCR                                  |
| 6  | Syn017_intern_B                   | TTGGGAGCTAACTTGCCAC      | RT-PCR                                  |
| 7  | rnpb 6803 primer fwd              | GGAGTTGCGGATTCCTGTCA     | RT-PCR                                  |
| 8  | rnpb 6803 primer rev              | AAGACCAACCTTTGCCCTC      | RT-PCR                                  |
| 9  | Syn708_intern_A                   | TGGAGTGCCCTGCCTAACG      | RT-PCR                                  |
| 10 | Syn708_intern_B                   | CCCTTCTAACCTTTGTGGGGC    | RT-PCR                                  |
| 11 | Syc484_intern_A                   | CTACCATTCTTGGTGTGGCGG    | RT-PCR                                  |
| 12 | Syc484_intern_B                   | GAAATCCTGCGATCGCTGTTG    | RT-PCR                                  |
| 13 | Syc879_intern_A                   | CCTGTGACTTCTCTCCAGGG     | RT-PCR                                  |
| 14 | Syc879_intern_B                   | CTTTTAACTCGCGATCGCGGC    | RT-PCR                                  |
| 15 | Nos389_intern_A                   | ATCACCTGAATTAGCTGCGG     | RT-PCR                                  |
| 16 | Nos389_intern_B                   | CTAATAATGCCGCAATCAGCG    | RT-PCR                                  |
| 17 | All4982_intern_A                  | ATCAGATGGTGGAGGGAAGC     | RT-PCR                                  |
| 18 | All4983_intern_A                  | AGTAGCTGCATTTATCGGTGC    | RT-PCR                                  |
| 19 | pET19bmod-Fwd                     | GGAATTGTGAGCGGATAACAATT  | Sequencing of pET21a(+) inserts         |
| 20 | T7R                               | CTAATACGACTCACTATAGGGA   | Sequencing of pET21a(+) inserts         |
| 21 | pAM2991_Seq_A                     | GCGCCGACATCATAACGGTTC    | Sequencing of pAM2991 inserts           |
| 22 | pAM2991_Seq_B                     | GCTGAAAATCTTCTCTCATCCGCC | Sequencing of pAM2991 inserts           |
| 23 | pRL153_Seq_Rev                    | AGGAGATTAACCCGCCAAG      | Sequencing of pRL153 inserts            |
| 24 | CS3_Seq_Fwd                       | CGCGCAGATCAGTTGGAAG      | Sequencing of gene replacement plasmids |
| 25 | CS3_Seq_Rev                       | AACGTCGGTTCGAGATGGC      | Sequencing of gene replacement plasmids |
| 26 | GFP_Seq_Rev                       | TTGTGCCCATTAACATCACCATC  | Sequencing of GFP containing plasmids   |
| 27 | pJET1.2 forward sequencing primer | CRACTCACTATAGGGAGAGCGGC  | Sequencing of pJET1.2 inserts           |
| 28 | pJET1.2 reverse sequencing primer | AAGAACATCGATTTTCCATGGCAG | Sequencing of pJET1.2 inserts           |
| 29 | pKO_Seq_Fwd                       | GCCTTTTTACGGTTCCTGGC     | Sequencing pTHS121                      |

|    |                      |                                                      |                                                |
|----|----------------------|------------------------------------------------------|------------------------------------------------|
| 30 | pKO_Seq_Rev          | TCTTTTCTACGGGGTCTGACG                                | Sequencing pTHS121                             |
| 31 | pIGA_Seq_Fwd         | TGCGCATAGAAATTGCATCA                                 | Sequencing of pIGA inserts                     |
| 32 | pIGA_Seq_Rev         | GTCAGCAACACCTTCTTCA                                  | Sequencing of pIGA inserts                     |
| 33 | pRL271_Seq_Fwd       | GCCTGGTGCTACGCCTGAATA                                | Sequencing of pRL271 inserts                   |
| 34 | pRL271_Seq_Rev       | CCAGTTAATAGTTTGCGCAACGTTG                            | Sequencing of pRL271 inserts                   |
| 35 | pRL278_Seq_Fwd       | GGGGCGTAATTTTTTTAAGGCAGTT<br>ATTG                    | Sequencing of pRL278 inserts                   |
| 36 | pSL2680_Seq_A        | CAAGAGGGCAAAAACTCAATTTG                              | Sequencing of pSL2680 inserts                  |
| 37 | cpf1_1A              | TTGGTCATGAGATTATCAAAAAGGAT<br>CCTGGAAAACGTTCTTCGGGGC | Amplification of <i>cpf1</i> for pTHS123       |
| 38 | pRL25c_CRISPR_2<br>B | AGGCCCTTTCGTCTTCAAGAATTCTT<br>TACTGATGAATGTTCCGTTGCG | Amplification of <i>cpf1</i> for pTHS123       |
| 39 | cpf1-1               | CTCCAGAAGCTATAAACTATGAAC                             | Sequencing of <i>cpf1</i>                      |
| 40 | cpf1-2               | CTACTTCAAGCTAGTGCGGAA                                | Sequencing of <i>cpf1</i>                      |
| 41 | cpf1-3               | GTTGAAAATCAAGGCTACAACTAA<br>C                        | Sequencing of <i>cpf1</i>                      |
| 42 | cpf1-4               | CGTTTCAAGGTAGAGAAGCAGG                               | Sequencing of <i>cpf1</i>                      |
| 43 | pRL25c_Seq_Fwd       | CTTTGATCTTTTCTACGGGGTCT                              | Sequencing of pRL25C inserts                   |
| 44 | pRL25c_Seq_Rev       | TTGAGGTGAGGGATGAGCG                                  | Sequencing of pRL25C inserts                   |
| 45 | pMAL_Seq_Fwd         | AGAAAGGTGAAATCATGCCG                                 | Sequencing of pMAL-c2x inserts                 |
| 46 | pMAL_Seq_Rev         | CTGCAAGGCGATTAAGTTGG                                 | Sequencing of pMAL-c2x inserts                 |
| 47 | MB_Seq_A             | GGCTCGTATGTTGTGTGG                                   | Sequencing of pKNT25, pKT25 and pUT18 inserts  |
| 48 | MB_Seq_B             | GGCTTAACTATGCGGCATC                                  | Sequencing of pKNT25, pUT18 and pUT18C inserts |
| 49 | MB_Seq_C             | TAACGCCAGGGTTTTCCA                                   | Sequencing of pKT25 inserts                    |
| 50 | pKNT25_Seq_Rev       | CGTTTGCGTAACCAGCC                                    | Sequencing of pKNT25 inserts                   |
| 51 | pKT25_Seq_Fwd        | GATTCGGTGACCGATTACCTG                                | Sequencing of pKT25 inserts                    |
| 52 | pUT18_Seq_Rev        | GATGCGTTCGCGATCCAG                                   | Sequencing of pUT18 inserts                    |

|    |                |                                                       |                                                                     |
|----|----------------|-------------------------------------------------------|---------------------------------------------------------------------|
| 53 | pUT18C_Seq_Fwd | TCGCCGGATGTACTGGAAAC                                  | Sequencing of pUT18C inserts                                        |
| 54 | N-term_1A      | GAGGATCCCCGGGTACC                                     | Amplification of pKNT25 and pUT18                                   |
| 55 | N-term_1B      | TAGAGTCGACCTGCAGGCA                                   | Amplification of pKNT25 and pUT18                                   |
| 56 | pKT25_1A       | CCCCGGGTACCTAAGTAAGTAAG                               | Amplification of pKT25                                              |
| 57 | pKT25_1B       | ATCCTCTAGAGTCGACCCTGC                                 | Amplification of pKT25                                              |
| 58 | pUT18C_1A      | CCGAGCTCGAATTCATCGAT                                  | Amplification of pUT18C                                             |
| 59 | pUT18C_1B      | TACCCGGGGATCCTCTAGAGT                                 | Amplification of pUT18C                                             |
| 60 | pET21a_1A      | CACCACCACCACCACCAC                                    | Amplification of pET21a(+) for gfp fusions                          |
| 61 | pET21a_1B      | ATGTATATCTCCTTCTTAAAGTTAAA<br>CAAATTATTTCTAGAGG       | Amplification of pET21a(+) for gfp fusions                          |
| 62 | pRL271_Fwd     | GAGCTCGCGAAAGCTTGCATG                                 | Amplification of pRL271 and pRL278                                  |
| 63 | pRL271_Rev     | CTCGAGATCTAGATATCGAATTTCTG<br>CCAT                    | Amplification of pRL271                                             |
| 64 | pRL278_Rev     | CCGCTTATTATCACTTATTCAGGCG                             | Amplification of pRL278                                             |
| 65 | pETM22_Vec_R   | ATGTTTTTCGTATTTTCCCTACCAGA<br>AGAATGATGATGATGATGG     | Amplification of pETM22                                             |
| 66 | pETM22_Vec_F   | TGGATGAACTATACAAATAAATCCG<br>GCTGCTAACAAAGC           | Amplification of pETM22                                             |
| 67 | Vector.FOR     | TGATGTTCAACTTCGACAGCGAATT<br>CCTCGACCTGCAGGG          | Amplification of pIGA                                               |
| 68 | Vector.REV     | AGGGACTCTTCTCTACAGGTGGTAC<br>CCCGGGTTCGAAATCG         | Amplification of pIGA                                               |
| 69 | YFP_pcpc560_2A | CATAAAGTCAAGTAGGAGATTAATTC<br>AATGCTGAGCAAGGGCGA      | Amplification of YFP with overhang to P <sub>pcpc560</sub>          |
| 70 | YFP_2A         | TACAGGTTAGGAGAACGCCATGCTG<br>AGCAAGGGCG               | Amplification of YFP                                                |
| 71 | YFP-Myc_2B     | CAGATCCTCTTCAGAGATGAGTTTC<br>TGCTCCTTGACAGCTCGTCCATGC | Amplification of YFP with C-terminal <i>myc</i>                     |
| 72 | Myc+Linker_2B  | TCCTGAACCCGATCCAGAGCCCAGA<br>TCCTCTTCAGAGATGAGTTTC    | Amplification of YFP with C-terminal <i>myc</i> and a GSGSGS linker |
| 73 | XIII-GFP_1A    | GCTAGCGACTCGACCGGTTC                                  | Amplification of pRL153                                             |



|     |                  |                                                       |                                                                                      |
|-----|------------------|-------------------------------------------------------|--------------------------------------------------------------------------------------|
| 98  | TrbcL_A          | ACCGGTGTTTGGATTGTCGG                                  | Amplification of pIGA containing P <sub>cpc560</sub> and T <sub>rbcl</sub> for pTH76 |
| 99  | pIGA_Pcpc560_1B  | TGAATTAATCTCCTACTTGACTTTATGAGTTGGG                    | Amplification of pIGA containing P <sub>cpc560</sub> and T <sub>rbcl</sub> for pTH76 |
| 100 | YFP_pcpc560_2A   | CATAAAGTCAAGTAGGAGATTAATTC AATGCTGAGCAAGGGCGA         | <i>yfp-fm7001</i> for pTHS76                                                         |
| 101 | 7001_TrbcL_2B    | CCGACAATCCAAACACCGGTTTCAGACTAAGGCAGTCATTAATAGTGAAG    | <i>yfp-fm7001</i> for pTHS76                                                         |
| 102 | 7001F_BamHI      | ACTGGATCCAGGGAAAATACGAAAAACATTGGA                     | <i>fm7001</i> for pTHS63                                                             |
| 103 | 7001R_NotI       | AGCGGCCGCTCAGACTAAGGCAGTCATTAATAGTG                   | <i>fm7001</i> for pTHS63                                                             |
| 104 | 7001F_BamHI      | GGATCCTATGAGGGAAAATACGAAA AAC                         | <i>fm7001</i> for pTHS95, pTHS96, pTHS97 and pTHS98                                  |
| 105 | 7001R_EcoRI      | AGCGAATTCCTCAGACTAAGGCAGTCAT                          | <i>fm7001</i> for pTHS96 and pTHS98                                                  |
| 106 | 7001R_SacI       | GAGCTCCTGACTAAGGCAGTCATTA                             | <i>fm7001</i> for pTHS95 and pTHS97                                                  |
| 107 | 7120petER_7001ol | GTATTTTCCCTCATACCTGTAGTTTT ATTTTTCTTATTTT             | <i>petE</i> for pTHS83 (overlap PCR)                                                 |
| 108 | 7001F_petEol     | AAAACACTACAGGTATGAGGGAAAATACGAAAAAC                   | <i>fm7001</i> for pTHS83 (overlap PCR)                                               |
| 109 | 7001R_SacI_C     | AGCGAGCTCTAAGGCAGTCATTAAATAGTG                        | <i>fm7001</i> for pTHS83                                                             |
| 110 | 7001F_NheI       | AACTGCTAGCAGGGAAAATACGAAA AAC                         | <i>fm7001</i> for pTHS83                                                             |
| 111 | 7001_3A          | CTCTGGATCGGGTTCAGGAATGAGGGAAAATACGAAAAACATTGG         | <i>fm7001</i> for pTHS84                                                             |
| 112 | 7001_3B          | CCTTTTCGTCTTCAAGAATTCTTCAGACTAAGGCAGTCATTAATAGTG      | <i>fm7001</i> for pTHS84                                                             |
| 113 | pRL271_7up_F     | AGAAATTCGATATCTAGATCTCGAGAGCAATGTGAGTGAGTTCGTGAGC     | Upstream homology for pTHS126                                                        |
| 114 | 7001KO_1B        | GTGCTTGCGGCAGCGTGAAGCTTG GGGTTATCCTTAATAGAAGAAGAGTGC  | Upstream homology for pTHS126                                                        |
| 115 | 7001KO_2A        | CGCCTTCTTGACGAGTTCTTCTGAA TCAAGAGCATTCTTGATTTCTGTCTCA | Downstream homology for pTHS126                                                      |
| 116 | pRL271_7down_R   | CAGGCATGCAAGCTTTTCGCGAGCTCTGCTACCAAGACGATGCGTTTCATGTC | Downstream homology for pTHS126                                                      |



|     |                    |                                                                |                                                                                          |
|-----|--------------------|----------------------------------------------------------------|------------------------------------------------------------------------------------------|
| 117 | 7001KO_2A2         | AATTCGATATCTAGATCTCGAGTTGC<br>GTTTCAAACACTACAAATTAGTACA<br>AAC | Upstream<br>homology for<br>pTHS127                                                      |
| 118 | 7001KO_2B2         | AAGGTGCTGTGCACGGATCGGGGT<br>TATCCTTAATAGAAGAAGAGTGC            | Upstream<br>homology for<br>pTHS127                                                      |
| 119 | 7001KO_4A2         | CAAGGTAGTCGGCAAATAAATCAAG<br>AGCATTCTTGATTTCTGTCTC             | Downstream<br>homology for<br>pTHS127                                                    |
| 120 | 7001KO_4B2         | TGCAAGCTTTCGCGAGCTCCTGAAG<br>ACAAAGATGAAGTTTCGATATTACC         | Downstream<br>homology for<br>pTHS127                                                    |
| 121 | trunc7001_2A       | CTGAATAAGTGATAATAAGCGGTTG<br>CGTTTCAAACACTACAAATTAGTAC<br>AAA  | Truncated<br><i>fm7001</i> for<br>pTHS128                                                |
| 122 | trunc7001_2B       | TGCAAGCTTTCGCGAGCTCGTATTG<br>ATACTGGGTTGAGAATACTGC             | Truncated<br><i>fm7001</i> for<br>pTHS128                                                |
| 123 | 7001_gRNA_A        | AGATGAGTTTTGCACAAAGTTGGA                                       | <i>fm7001</i> gRNA<br>for pTHS121<br>and pTHS123                                         |
| 124 | 7001_gRNA_B        | AGACTCCAACCTTTGTGCAAAACTC                                      | <i>fm7001</i> gRNA<br>for pTHS121<br>and pTHS123                                         |
| 125 | Fm7001_HL1A        | TTGTCTAGCTTTAATGCGGTAGTTG<br>GTACCAGGAACATCGCGTCTCTACC         | Downstream<br>homology repair<br>template for<br>pTHS121 and<br>pTHS123                  |
| 126 | Fm7001_HL1B        | AAGAATGCTCTTGATGGGGTTATCC<br>TTAATAGAAGAAGAGTGC                | Upstream<br>homology repair<br>template for<br>pTHS121 and<br>pTHS123                    |
| 127 | Fm7001_HL2A        | TATTAAGGATAACCCCATCAAGAGC<br>ATTCTTGATTTCTGTCTC                | Upstream<br>homology repair<br>template for<br>pTHS121 and<br>pTHS123                    |
| 128 | Fm7001_HL2B        | GATTACAGATCCTCTAGAGTCGACG<br>GTACCTAAGGCAGCAACGTTTTCCG         | Downstream<br>homology repair<br>template for<br>pTHS121 and<br>pTHS123                  |
| 129 | Syn017_NdeI_fwd    | GCTACATATGACAAGTCAAATTTTG<br>TTTCTGAT                          | <i>slr7083</i> for<br>pTHS61                                                             |
| 130 | Syn017_XhoI_wo_rev | GCTACTCGAGTGGTAAATAAGGGGG<br>AGTGG                             | <i>slr7083</i> for<br>pTHS61                                                             |
| 131 | pIGA_V_017_R       | ACAAAATTTTGACTTGTCAATTGAATT<br>AATCTCCTACTTGACTTTATGAGTTG<br>G | Amplification of<br>pIGA with P <sub>cpc560</sub><br>and T <sub>rbcl</sub> for<br>pTHS77 |
| 132 | pIGA_V_017_F       | CCACTCCCCCTTATTACCAGCTAG<br>TGCATCTGCTAGTGCT                   | Amplification of<br>pIGA with P <sub>cpc560</sub>                                        |



|     |                       |                                                                     |                                       |
|-----|-----------------------|---------------------------------------------------------------------|---------------------------------------|
| 154 | Syc484_KO_4A          | TTCTTGACGAGTTCTTCTGATTCTGC<br>TGCGATGCGTTAGG                        | Downstream<br>homology for<br>pTHS119 |
| 155 | Syc484_KO_4B          | CTCGAGTTTTTCAGCAAGATCAAGT<br>AAGACTGGCTGCCATG                       | Downstream<br>homology for<br>pTHS119 |
| 156 | Syc484_Seq_A          | GATGCCACCGAGCAGAATTAG                                               | Verification of<br>$\Delta$ syc2039   |
| 157 | Syc484_Seq_B          | GGCAGATCAATCAGCAGCTC                                                | Verification of<br>$\Delta$ syc2039   |
| 158 | Syc879_pET_2A         | GTTTAACTTTAAGAAGGAGATATACA<br>TATGCTCTATCTGGCTGAAGTCG               | syc1139 for<br>pTHS66                 |
| 159 | Syc879_pET_2B         | CAGTGGTGGTGGTGGTGGTGGGCT<br>GCAATCAGTTGATGACT                       | syc1139 for<br>pTHS66                 |
| 160 | Syc879_pIGA_2A        | TAAAGTCAAGTAGGAGATTAATTCA<br>GTGCTCTATCTGGCTGAAGTCGG                | syc1139 for<br>pTHS81                 |
| 161 | Syc879_2A             | TACAGGTTAGGAGAACGCCATGCTC<br>TATCTGGCTGAAGTCG                       | syc1139 for<br>pTHS93                 |
| 162 | Syc879_2B             | CACTAGCAGATGCACTAGCGGCTGC<br>AATCAGTTGATGACTG                       | syc1139 for<br>pTHS93                 |
| 163 | Syc879_pAM2991_2<br>A | CACACAGGAAACAGACCATGCTCTA<br>TCTGGCTGAAGTCGG                        | syc1139 for<br>pTHS74                 |
| 164 | Syc879_KO_2A          | TGTAGGAGATCTTCTAGAAAGATCT<br>GGAGCGATCGCTATGG                       | Upstream<br>homology for<br>pTHS133   |
| 165 | Syc879_KO_2B          | CTTGCGGCAGCGTGAAGCTTTATCG<br>ATGCCTCGCCTTAATCAATC                   | Upstream<br>homology for<br>pTHS133   |
| 166 | Syc879_KO_4A          | CCTTCTTGACGAGTTCTTCTGAGCC<br>AGTCCCCCGCGACTA                        | Downstream<br>homology for<br>pTHS133 |
| 167 | Syc879_KO_4B          | CTCGAGTTTTTCAGCAAGATGGCAA<br>GCGCAACTGAATTCTTAC                     | Downstream<br>homology for<br>pTHS133 |
| 168 | Syn708_NdeI_F         | GCTACATATGCTCTATCTGGCTGAA<br>ATTAAGAAA                              | slr1301 for<br>pTHS65                 |
| 169 | Syn708_XhoI_R_w/<br>o | GCTACTCGAGACCGCCAAACAATAG<br>GGTC                                   | slr1301 for<br>pTHS65                 |
| 170 | Syn708_pET_2A         | GTTTAACTTTAAGAAGGAGATATACA<br>TATGCTCTATCTGGCTGAAATTAAGA<br>AAC     | slr1301 for<br>pTHS67                 |
| 171 | Syn708_pRL25c_Fw<br>d | TAAAACACTACAGGTTAGGAGAACGCC<br>ATGCTCTATCTGGCTGAAATTAAGAA<br>ACAAAC | slr1301 for<br>pTHS91                 |
| 172 | Syn708_pRL25c_Re<br>v | CACTAGCACTAGCAGATGCACTAGC<br>ACCGCCAAACAATAGGGTCT                   | slr1301 for<br>pTHS91                 |
| 173 | Syn708_3A             | CTCTGGATCGGGTTCAGGAGTGCTC<br>TATCTGGCTGAAATTAAG                     | slr1301 for<br>pTHS92                 |
| 174 | Syn708_3B             | CCTTTCGTCTTCAAGAATTCTCTAAC<br>CGCCAAACAATAGGGTC                     | slr1301 for<br>pTHS92                 |
| 175 | 153Syn708_2A          | AGAATTAAGAGGAGAAATTAAGCA<br>TGCTCTATCTGGCTGAAATTAAGAAA<br>C         | slr1301 for<br>pTHS82                 |
| 176 | 153Syn708_2B          | TCAGAGATGAGTTTCTGCTCACCGC<br>CAAACAATAGGGTC                         | slr1301 for<br>pTHS82                 |

|     |                  |                                                                      |                                       |
|-----|------------------|----------------------------------------------------------------------|---------------------------------------|
| 177 | pJET708_2A       | TGTAGGAGATCTTCTAGAAAAGATAAT<br>AGACTGCAATGTCAAAAACTCAG               | Upstream<br>homology for<br>pTHS131   |
| 178 | 708KO_CS3_2B     | CAAGGTGCTGTGCACGGATCAAGTC<br>GTTGTCCTGAGCAG                          | Upstream<br>homology for<br>pTHS131   |
| 179 | 708KO_CS3_4A     | CCAAGGTAGTCGGCAAATAATTGGG<br>TTGGTTGCCGAC                            | Downstream<br>homology for<br>pTHS131 |
| 180 | pJET708_4B       | CTCGAGTTTTTCAGCAAGATTTAGCA<br>AGGTGGGGGGAATG                         | Downstream<br>homology for<br>pTHS131 |
| 181 | 708KO_1Aa        | CCTGATTCTGTGGATAACCGTACGT<br>CAAATCGAATTCCCGGC                       | Upstream<br>homology for<br>pTHS132   |
| 182 | 708KO_1B         | TGCTTGCGGCAGCGTGAAGCTTAAG<br>TCGTTGTCCTGAGCAGTG                      | Upstream<br>homology for<br>pTHS132   |
| 183 | 708KO_2A         | CGCCTTCTTGACGAGTTCTTCTGATT<br>GGGTTGGTTGCCGACTTC                     | Downstream<br>homology for<br>pTHS132 |
| 184 | 708KO_2B         | GATTATCAAAAAGGATCTTCACCTTT<br>AGCAAGGTGGGGGGAATGC                    | Downstream<br>homology for<br>pTHS132 |
| 185 | Nos389_pET_2A    | GTTTAACTTTAAGAAGGAGATATACA<br>TATGAATAGTGAGTTGTTCCAGAAG<br>C         | <i>all4981</i> for<br>pTHS72          |
| 186 | Nos389_NdeI_F    | GCTACATATGAATAGTGAGTTGTTCC<br>CAGAAG                                 | <i>all4981</i> for<br>pTHS64          |
| 187 | Nos389_XhoI_wo_R | GCTACTCGAGGATGTTACTATCACT<br>ACTTTGAATTTTT                           | <i>all4981</i> for<br>pTHS64          |
| 188 | Nos389_2A        | CTACAGGTTAGGAGAACGCCATGAA<br>TAGTGAGTTGTTCCAGAAGCTAGC                | <i>all4981</i> for<br>pTHS89          |
| 189 | Nos389_2B        | GCACTAGCAGATGCACTAGCGATGT<br>TACTATCACTACTTTGAATTTTTTTGA<br>GTTTGGC  | <i>all4981</i> for<br>pTHS89          |
| 190 | Nos389_3A        | CTCTGGATCGGGTTCAGGAATGAAT<br>AGTGAGTTGTTCCAGAAGC                     | <i>all4981</i> for<br>pTHS88          |
| 191 | Nos389_3B        | CCTTTCGTCTTCAAGAATTCTTTAGA<br>TGTTACTATCACTACTTTGAATTTTTT<br>TGAG    | <i>all4981</i> for<br>pTHS88          |
| 192 | Nos389_pIGA_2A   | TAAAGTCAAGTAGGAGATTAATTCAA<br>TGAATAGTGAGTTGTTCCAGAAGC               | <i>all4981</i> for<br>pTHS79          |
| 193 | Nos389_TrbcL_2B  | CCGACAATCCAAACACCGGTTTAGA<br>TGTTACTATCACTACTTTGAATTTTTT<br>TGAGTTTG | <i>all4981</i> for<br>pTHS78          |
| 194 | 389KO_2A         | ATTCGATATCTAGATCTCGAGTGTC<br>GATTTAGTACTTTAAATACAAGACTT<br>ACACAC    | Upstream<br>homology for<br>pTHS129   |
| 195 | 389KO_2B         | CAAGGTGCTGTGCACGGATCAGCT<br>GTTCCGCTCTTGAGGG                         | Upstream<br>homology for<br>pTHS129   |
| 196 | 389KO_4A         | CCAAGGTAGTCGGCAAATAAAGTAA<br>CGCGATGTGCCGACT                         | Downstream<br>homology for<br>pTHS129 |

|     |               |                                                               |                                                      |
|-----|---------------|---------------------------------------------------------------|------------------------------------------------------|
| 197 | 389KO_4B      | ATGCAAGCTTTTCGCGAGCTCGATTA<br>ATACCTTTGGTGTTTCATGACACTGG      | Downstream<br>homology for<br>pTHS129                |
| 198 | trunc389_2A   | CTGAATAAGTGATAATAAGCGGAAG<br>CCATTTTAGATCGAGAGGCG             | Truncated<br><i>all4981</i> for<br>pTHS130           |
| 199 | trunc389_2B   | TGCAAGCTTTTCGCGAGCTCGCTAAA<br>TTCCAAAACACTCACTGCCTT           | Truncated<br><i>all4981</i> for<br>pTHS130           |
| 200 | Nos389_gRNA-A | AGATCAGAAGCTAGCAAAAGCACA                                      | <i>all4981</i> gRNA<br>for pTHS124<br>and pTHS125    |
| 201 | Nos389_gRNA-B | AGACTGTGCTTTTGCTAGCTTCTG                                      | <i>all4981</i> gRNA<br>for pTHS124<br>and pTHS125    |
| 202 | Nos389_HL1A   | TTTGTCTAGCTTTAATGCGGTAGTTG<br>GTACCGTGTGGGGTAATTTGCGGG        | Upstream<br>homology for<br>pTHS124 and<br>pTHS125   |
| 203 | Nos389_HL1B   | ATAAGTCGCACATCGCGTACTTCA<br>TAGCTGTTGCTCTTGAGG                | Upstream<br>homology for<br>pTHS124 and<br>pTHS125   |
| 204 | Nos389_HR2A   | CCTCAAGAGCGAACAGCTATGAAGT<br>AACGCGATGTGCGACTTATTC            | Downstream<br>homology for<br>pTHS124 and<br>pTHS125 |
| 205 | Nos389_HR2B   | GGATTACAGATCCTCTAGAGTCGAC<br>GGTACCGGACACCACCGCCATTC          | Downstream<br>homology for<br>pTHS124 and<br>pTHS125 |
| 206 | MB_1A         | TGCCTGCAGGTCGACTCTAATGAAT<br>AGTGAGTTGTTCCAGAAGC              | <i>all4981</i> for<br>pTHS107 and<br>pTHS109         |
| 207 | MB_1B         | TCGGTACCCGGGGATCCTCGATGTT<br>ACTATCACTACTTTGAATTTTTTTGA<br>GT | <i>All4981</i> for<br>pTHS107 and<br>pTHS109         |
| 208 | MB_2A         | AGGGTTCGACTCTAGAGGATATGAAT<br>AGTGAGTTGTTCCAGAAGC             | <i>all4981</i> for<br>pTHS108                        |
| 209 | MB_2B         | CTTACTTAGGTACCCGGGGGATGTT<br>ACTATCACTACTTTGAATTTTTTTGA<br>GT | <i>all4981</i> for<br>pTHS108                        |
| 210 | MB_4A         | TCTAGAGGATCCCCGGGTAATGAAT<br>AGTGAGTTGTTCCAGAAGC              | <i>all4981</i> for<br>pTHS110                        |
| 211 | MB_4B         | TCGATGAATTCGAGCTCGGGATGTT<br>ACTATCACTACTTTGAATTTTTTTGA<br>GT | <i>all4981</i> for<br>pTHS110                        |
| 212 | MB_9A         | TGCCTGCAGGTCGACTCTAATGCTC<br>TATCTGGCTGAAATTAAGAAAC           | <i>slr1301</i> for<br>pTHS111 and<br>pTHS113         |
| 213 | MB_9B         | TCGGTACCCGGGGATCCTCACCGC<br>CAAACAATAGGGT                     | <i>slr1301</i> for<br>pTHS111 and<br>pTHS113         |
| 214 | MB_10A        | AGGGTTCGACTCTAGAGGATATGCTC<br>TATCTGGCTGAAATTAAGAAAC          | <i>slr1301</i> for<br>pTHS112                        |

|     |              |                                                       |                                              |
|-----|--------------|-------------------------------------------------------|----------------------------------------------|
| 215 | MB_10B       | CTTACTTAGGTACCCGGGGACCGCC<br>AAACAATAGGGTC            | <i>slr1301</i> for<br>pTHS112                |
| 216 | MB_12A       | TCTAGAGGATCCCCGGGTAATGCTC<br>TATCTGGCTGAAATTAAGAAAC   | <i>slr1301</i> for<br>pTHS114                |
| 217 | MB_12B       | TCGATGAATTCGAGCTCGGACCGCC<br>AAACAATAGGGTC            | <i>slr1301</i> for<br>pTHS114                |
| 218 | MB_13A       | TGCCTGCAGGTCGACTCTAATGACA<br>AGTCAAAATTTTGTCTGATCAAG  | <i>slr7083</i> for<br>pTHS99 and<br>pTHS101  |
| 219 | MB_13B       | TCGGTACCCGGGGATCCTCTGGTAA<br>ATAAGGGGGAGTGGGAC        | <i>slr7083</i> for<br>pTHS99 and<br>pTHS101  |
| 220 | MB_14A       | AGGGTTCGACTCTAGAGGATATGACA<br>AGTCAAAATTTTGTCTGATCAAG | <i>slr7083</i> for<br>pTHS100                |
| 221 | MB_14B       | CTTACTTAGGTACCCGGGGTGGTAA<br>ATAAGGGGGAGTGGGAC        | <i>slr7083</i> for<br>pTHS100                |
| 222 | MB_16A       | TCTAGAGGATCCCCGGGTAATGACA<br>AGTCAAAATTTTGTCTGATCAAG  | <i>slr7083</i> for<br>pTHS102                |
| 223 | MB_16B       | TCGATGAATTCGAGCTCGGTGGTAA<br>ATAAGGGGGAGTGGGAC        | <i>slr7083</i> for<br>pTHS102                |
| 224 | MB_33A       | TGCCTGCAGGTCGACTCTAATGCTC<br>TATCTGGCTGAAGTCG         | <i>syc1139</i> for<br>pTHS115 and<br>pTHS117 |
| 225 | MB_33B       | TCGGTACCCGGGGATCCTCGGCTG<br>CAATCAGTTGATGACT          | <i>syc1139</i> for<br>pTHS115 and<br>pTHS117 |
| 226 | MB_34A       | AGGGTTCGACTCTAGAGGATATGCTC<br>TATCTGGCTGAAGTCG        | <i>syc1139</i> for<br>pTHS116                |
| 227 | MB_34B       | CTTACTTAGGTACCCGGGGGGCTG<br>CAATCAGTTGATGACT          | <i>syc1139</i> for<br>pTHS116                |
| 228 | MB_36A       | TCTAGAGGATCCCCGGGTAATGCTC<br>TATCTGGCTGAAGTCG         | <i>syc1139</i> for<br>pTHS118                |
| 229 | MB_36B       | TCGATGAATTCGAGCTCGGGGCTGC<br>AATCAGTTGATGACT          | <i>syc1139</i> for<br>pTHS118                |
| 230 | MB_45A       | TGCCTGCAGGTCGACTCTAATGAAC<br>TACGCTCTTACCCAAG         | <i>syc2039</i> for<br>pTHS103 and<br>pTHS105 |
| 231 | MB_45B       | TCGGTACCCGGGGATCCTCAGACC<br>CTAACCAGCGGC              | <i>syc2039</i> for<br>pTHS103 and<br>pTHS105 |
| 232 | MB_46A       | AGGGTTCGACTCTAGAGGATATGAAC<br>TACGCTCTTACCCAAG        | <i>syc2039</i> for<br>pTHS104                |
| 233 | MB_46B       | CTTACTTAGGTACCCGGGGAGACCC<br>TAACCAGCGGC              | <i>syc2039</i> for<br>pTHS104                |
| 234 | MB_48A       | TCTAGAGGATCCCCGGGTAATGAAC<br>TACGCTCTTACCCAAG         | <i>syc2039</i> for<br>pTHS106                |
| 235 | MB_48B       | TCGATGAATTCGAGCTCGGAGACCC<br>TAACCAGCGGC              | <i>syc2039</i> for<br>pTHS106                |
| 236 | 708_Seq_A    | CCAACAACTACCTACCACCAGTC                               | Verification of<br><i>Δslr1301</i>           |
| 237 | 708_Seq_B    | CCGTAGGGATGCCTGATAAACC                                | Verification of<br><i>Δslr1301</i>           |
| 238 | Syc879_Seq_A | CATCAGGAATGGATGCAGGAGG                                | Verification of<br><i>Δsyc1139</i>           |

|     |              |                        |                                  |
|-----|--------------|------------------------|----------------------------------|
| 239 | Syc879_Seq_B | GGCCGCTAATCACTTTTCAGTG | Verification of $\Delta$ syc1139 |
|-----|--------------|------------------------|----------------------------------|

1307 Restriction sites or overlapping sites are underlined.

1308

1309 **Supplementary Table 5: Employed and generated Plasmids**

| Plasmids          | Description                                                                                                     | Resistance | Reference                                                                               |
|-------------------|-----------------------------------------------------------------------------------------------------------------|------------|-----------------------------------------------------------------------------------------|
| pJET1.2/<br>blunt | <i>E. coli</i> subcloning vector                                                                                | Amp        | Thermo Fischer Scientific                                                               |
| pMAL-c2x          | Bacterial vector for expressing N-terminal MBP-tagged proteins in <i>E. coli</i> with a Factor Xa cleavage site | Amp        | A gift from Axel Scheidig (University of Kiel)                                          |
| pet21a(+)         | Bacterial vector for expressing C-terminal 6His-tagged proteins in <i>E. coli</i>                               | Amp        | Novagen                                                                                 |
| pRL25C            | Shuttle cosmid vector for cyanobacteria and <i>E. coli</i>                                                      | Km, Nm     | Wolk <i>et al.</i> , 1988                                                               |
| pRL623            | Methylation plasmid                                                                                             | Cm         | Wolk <i>et al.</i> , 1988                                                               |
| pRL443            | Conjugation plasmid                                                                                             | Amp        | Wolk <i>et al.</i> , 1988                                                               |
| pRL271            | <i>sacB</i> containing plasmid to select for double homologous recombination in <i>Anabaena</i>                 | Cm         | Cai and Wolk, 1990                                                                      |
| pRL278            | <i>sacB</i> containing plasmid to select for double homologous recombination in <i>Anabaena</i>                 | Km, Nm     | Cai and Wolk, 1990                                                                      |
| pSL2680           | Cpf1-mediated CRISPR editing plasmid                                                                            | Km, Nm     | Ungerer and Pakrasi, 2016                                                               |
| pRL25c-CRISPR     | Functional CRISPR cassette from pSL2680 transferred into EcoRI and BamHI digested pRL25c by GIBSON assembly     | Km, Nm     | This work                                                                               |
| pSM2-Pcpc560ter   | pMD18-T derivate for insertion into <i>pta</i> , containing $P_{cpc560}::ter::T_{rbcL}$ expression cassette     | Km, Amp    | A gift from Yin Li (Chinese Academy of Science). Zhou <i>et al.</i> , 2014              |
| pIGA              | Cyanobacterial vector for insertion into neutral locus (RS1 and RS2) of <i>slr0168</i> in <i>Synechocystis</i>  | Amp, Km    | A gift from Martin Hagemann (University of Rostock), Kunert, Hagemann and Erdmann, 2000 |
| pRL153-GFP        | Mobilizable broad host range vector, $P_{trc}-gfp$                                                              | Km, Nm     | Tolonen, Liszt and Hess, 2006                                                           |
| pKNT25            | $P_{lac}::T25$                                                                                                  | Km         | Euromedex                                                                               |
| pKT25             | $P_{lac}::T25-$                                                                                                 | Km         | Euromedex                                                                               |
| pUT18             | $P_{lac}::T18$                                                                                                  | Amp        | Euromedex                                                                               |
| pUT18C            | $P_{lac}::T18-$                                                                                                 | Amp        | Euromedex                                                                               |

|                    |                                                                                                                                               |         |                                                    |
|--------------------|-----------------------------------------------------------------------------------------------------------------------------------------------|---------|----------------------------------------------------|
| pKT25- <i>zip</i>  | pKT25; P <sub>lac</sub> :: <i>T25-<i>zip</i></i>                                                                                              | Km      | Euromedex                                          |
| pUT18C- <i>zip</i> | pUT18C, P <sub>lac</sub> :: <i>T18-<i>zip</i></i>                                                                                             | Amp     | Euromedex                                          |
| pAM2991            | Cyanobacterial vector for expression of proteins under the control of P <sub>trc</sub> that inserts into the NS1 site of <i>Synechococcus</i> | Sm, Sp  | A gift from Susan Golden (Addgene plasmid # 40248) |
| pTHS1              | pRL25C, P <sub>petE</sub> :: <i>alr4504-gfp</i>                                                                                               | Km, Nm  | Springstein <i>et al.</i> , 2019                   |
| pTHS33             | pKNT25, P <sub>lac</sub> :: <i>sepJ-T25</i>                                                                                                   | Km, Nm  | Springstein <i>et al.</i> , 2019                   |
| pTHS34             | pKT25, P <sub>lac</sub> :: <i>T25-sepJ</i>                                                                                                    | Km, Nm  | Springstein <i>et al.</i> , 2019                   |
| pTHS35             | pUT18, P <sub>lac</sub> :: <i>sepJ-T18</i>                                                                                                    | Amp     | Springstein <i>et al.</i> , 2019                   |
| pTHS36             | pUT18C, P <sub>lac</sub> :: <i>T18-sepJ</i>                                                                                                   | Amp     | Springstein <i>et al.</i> , 2019                   |
| pTHS37             | pKNT25, P <sub>lac</sub> :: <i>ftsZ-T25</i>                                                                                                   | Km, Nm  | Springstein <i>et al.</i> , 2019                   |
| pTHS38             | pKT25, P <sub>lac</sub> :: <i>T25-ftsZ</i>                                                                                                    | Km, Nm  | Springstein <i>et al.</i> , 2019                   |
| pTHS39             | pUT18, P <sub>lac</sub> :: <i>ftsZ-T18</i>                                                                                                    | Amp     | Springstein <i>et al.</i> , 2019                   |
| pTHS40             | pUT18C, P <sub>lac</sub> :: <i>T18-ftsZ</i>                                                                                                   | Amp     | Springstein <i>et al.</i> , 2019                   |
| pTHS41             | pKNT25, P <sub>lac</sub> :: <i>mreB-T25</i>                                                                                                   | Km, Nm  | Springstein <i>et al.</i> , 2019                   |
| pTHS42             | pKT25, P <sub>lac</sub> :: <i>T25-mreB</i>                                                                                                    | Km, Nm  | Springstein <i>et al.</i> , 2019                   |
| pTHS43             | pUT18, P <sub>lac</sub> :: <i>mreB-T18</i>                                                                                                    | Amp     | Springstein <i>et al.</i> , 2019                   |
| pTHS44             | pUT18C, P <sub>lac</sub> :: <i>T18-mreB</i>                                                                                                   | Amp     | Springstein <i>et al.</i> , 2019                   |
| pTHS60             | pIGA, P <sub>cpc560</sub> :: <i>fm7001-gfp</i> ::T <sub>rbcL</sub>                                                                            | Amp, Km | This study                                         |
| pTHS61             | pET21a(+), P <sub>T7</sub> :: <i>slr7083-his</i>                                                                                              | Amp     | This study                                         |
| pTHS62             | pET21a(+), P <sub>T7</sub> :: <i>syc2039-his</i>                                                                                              | Amp     | This study                                         |
| pTHS63             | pET21a(+), P <sub>T7</sub> :: <i>fm7001-his</i>                                                                                               | Amp     | This study                                         |
| pTHS64             | pET21a(+), P <sub>T7</sub> :: <i>all4981-his</i>                                                                                              | Amp     | This study                                         |
| pTHS65             | pET21a(+), P <sub>T7</sub> :: <i>slr1301-his</i>                                                                                              | Amp     | This study                                         |
| pTHS66             | pET21a(+), P <sub>T7</sub> :: <i>syc1139-his</i>                                                                                              | Amp     | This study                                         |
| pTHS67             | pET21a(+); P <sub>T7</sub> :: <i>slr1301-gfp</i>                                                                                              | Amp     | This study                                         |
| pTHS68             | pET21a(+), P <sub>T7</sub> :: <i>syc1139-gfp</i>                                                                                              | Amp     | This study                                         |
| pTHS69             | pET21a(+), P <sub>T7</sub> :: <i>slr7083-gfp</i>                                                                                              | Amp     | This study                                         |
| pTHS70             | pET21a(+), P <sub>T7</sub> :: <i>fm7001-gfp</i>                                                                                               | Amp     | This study                                         |
| pTHS71             | pET21a(+), P <sub>T7</sub> :: <i>syc2039-gfp</i>                                                                                              | Amp     | This study                                         |
| pTHS72             | pET21a(+), P <sub>T7</sub> :: <i>all4981-gfp</i>                                                                                              | Amp     | This study                                         |
| pTHS73             | pMAL-c2x; P <sub>lac</sub> :: <i>mbp-fm7001-his</i>                                                                                           | Amp     | This study                                         |
| pTHS74             | pAM2991, P <sub>trc</sub> :: <i>syc1139-gfp</i>                                                                                               | Sm, Sp  | This study                                         |
| pTHS75             | pAM2991, P <sub>trc</sub> :: <i>syc2039-gfp-his</i>                                                                                           | Sm, Sp  | This study                                         |
| pTHS76             | pIGA, P <sub>cpc560</sub> :: <i>yfp-fm7001</i> ::T <sub>rbcL</sub>                                                                            | Amp, Km | This study                                         |



|         |                                                                                             |         |            |
|---------|---------------------------------------------------------------------------------------------|---------|------------|
| pTHS77  | pIGA, P <sub>cpc560</sub> :: <i>slr7083-gfp</i> ::T <sub>rbcl</sub>                         | Amp, Km | This study |
| pTHS78  | pIGA, P <sub>cpc560</sub> :: <i>yfp-all4981</i> ::T <sub>rbcl</sub>                         | Amp, Km | This study |
| pTHS79  | pIGA, P <sub>cpc560</sub> :: <i>all4981-gfp</i> ::T <sub>rbcl</sub>                         | Amp, Km | This study |
| pTHS80  | pIGA, P <sub>cpc560</sub> :: <i>syc2039-gfp</i> ::T <sub>rbcl</sub>                         | Amp, Km | This study |
| pTHS81  | pIGA, P <sub>cpc560</sub> :: <i>syc1139-gfp</i> ::T <sub>rbcl</sub>                         | Amp, Km | This study |
| pTHS82  | pRL153, P <sub>trc</sub> :: <i>slr1301-yfp</i>                                              | Km, Nm  | This study |
| pTHS83  | pRL25C, P <sub>petE</sub> :: <i>fm7001-gfp</i>                                              | Km, Nm  | This study |
| pTHS84  | pRL25C, P <sub>petE</sub> :: <i>yfp-fm7001</i>                                              | Km, Nm  | This study |
| pTHS85  | pRL25C, P <sub>petE</sub> :: <i>yfp-sl7083</i>                                              | Km, Nm  | This study |
| pTHS86  | pRL25C, P <sub>petE</sub> :: <i>slr7083-gfp</i>                                             | Km, Nm  | This study |
| pTHS87  | pRL25C, P <sub>petE</sub> :: <i>syc2039-gfp</i>                                             | Km, Nm  | This study |
| pTHS88  | pRL25C, P <sub>petE</sub> :: <i>yfp-all4981</i>                                             | Km, Nm  | This study |
| pTHS89  | pRL25C, P <sub>petE</sub> :: <i>all4981-gfp</i>                                             | Km, Nm  | This study |
| pTHS90  | pRL25C, P <sub>petE-creS</sub> :: <i>gfp</i>                                                | Km, Nm  | This study |
| pTHS91  | pRL25C, P <sub>petE</sub> :: <i>slr1303-gfp</i>                                             | Km, Nm  | This study |
| pTHS92  | pRL25C, P <sub>petE</sub> :: <i>yfp-sl1303</i>                                              | Km, Nm  | This study |
| pTHS93  | pRL25C, P <sub>petE</sub> :: <i>syc1139-gf</i>                                              | Km, Nm  | This study |
| pTHS94  | pRL25C, P <sub>all4982</sub> :: <i>all4982-ecfp</i>                                         | Km, Nm  | This study |
| pTHS95  | pKNT25, P <sub>lac</sub> :: <i>fm7001-T25</i>                                               | Km, Nm  | This study |
| pTHS96  | pKT25, P <sub>lac</sub> :: <i>T25-fm7001</i>                                                | Km, Nm  | This study |
| pTHS97  | pUT18, P <sub>lac</sub> :: <i>fm7001-T18</i>                                                | Amp     | This study |
| pTHS98  | pUT18C, P <sub>lac</sub> :: <i>T18-fm7001</i>                                               | Amp     | This study |
| pTHS99  | pKNT25, P <sub>lac</sub> :: <i>slr7083-T25</i>                                              | Km, Nm  | This study |
| pTHS100 | pKT25, P <sub>lac</sub> :: <i>T25-sl7083</i>                                                | Km, Nm  | This study |
| pTHS101 | pUT18, P <sub>lac</sub> :: <i>slr7083-T18</i>                                               | Amp     | This study |
| pTHS102 | pUT18C, P <sub>lac</sub> :: <i>T18-sl7083</i>                                               | Amp     | This study |
| pTHS103 | pKNT25, P <sub>lac</sub> :: <i>syc2039-T25</i>                                              | Km, Nm  | This study |
| pTHS104 | pKT25, P <sub>lac</sub> :: <i>T25-syc2039</i>                                               | Km, Nm  | This study |
| pTHS105 | pUT18, P <sub>lac</sub> :: <i>syc2039-T18</i>                                               | Amp     | This study |
| pTHS106 | pUT18C, P <sub>lac</sub> :: <i>T18-syc2039</i>                                              | Amp     | This study |
| pTHS107 | pKNT25, P <sub>lac</sub> :: <i>all4981-T25</i>                                              | Km, Nm  | This study |
| pTHS108 | pKT25, P <sub>lac</sub> :: <i>T25-all4981</i>                                               | Km, Nm  | This study |
| pTHS109 | pUT18, P <sub>lac</sub> :: <i>all4981-T18</i>                                               | Amp     | This study |
| pTHS110 | pUT18C, P <sub>lac</sub> :: <i>T18-all4981</i>                                              | Amp     | This study |
| pTHS111 | pKNT25, P <sub>lac</sub> :: <i>slr1301-T25</i>                                              | Km, Nm  | This study |
| pTHS112 | pKT25, P <sub>lac</sub> :: <i>T25-sl1301</i>                                                | Km, Nm  | This study |
| pTHS113 | pUT18, P <sub>lac</sub> :: <i>slr1301-T18</i>                                               | Amp     | This study |
| pTHS114 | pUT18C, P <sub>lac</sub> :: <i>T18-sl1301</i>                                               | Amp     | This study |
| pTHS115 | pKNT25, P <sub>lac</sub> :: <i>syc1139-T25</i>                                              | Km, Nm  | This study |
| pTHS116 | pKT25, P <sub>lac</sub> :: <i>T25-syc1139</i>                                               | Km, Nm  | This study |
| pTHS117 | pUT18, P <sub>lac</sub> :: <i>syc1139-T18</i>                                               | Amp     | This study |
| pTHS118 | pUT18C, P <sub>lac</sub> :: <i>T18-syc1139</i>                                              | Amp     | This study |
| pTHS119 | pJET1.2/blunt with ~1000 bp upstream and downstream of <i>syc2039</i> flanking <i>nptII</i> | Amp     | This study |
| pTHS120 | Circularized pUC ori with 1000 bp upstream and downstream of <i>slr7083</i>                 | Km, Nm  | This study |

|         |                                                                                                                                       |                |            |
|---------|---------------------------------------------------------------------------------------------------------------------------------------|----------------|------------|
|         | flanking <i>nptII</i> assembled by GIBSON assembly                                                                                    |                |            |
| pTHS121 | pSL2680 with <i>fm7001</i> gRNA and homologous repair templates 1000 bp upstream and downstream of <i>fm7001</i>                      | Km, Nm         | This study |
| pTHS122 | pRL25C containing <i>cpf1</i> , <i>lacZα</i> and pre-crRNA array with tandem spacer-repeat sequences from <i>Francisella novicida</i> | Km, Nm         | This study |
| pTHS123 | pTHS122 with <i>fm7001</i> gRNA and homologous repair templates 1000 bp upstream and downstream of <i>fm7001</i>                      | Km, Nm         | This study |
| pTHS124 | pSL2680 with <i>all4981</i> gRNA and homologous repair templates 1000 bp upstream and downstream of <i>all4981</i>                    | Km, Nm         | This study |
| pTHS125 | pTHS122 with <i>all4981</i> gRNA and homologous repair templates 1000 bp upstream and downstream of <i>all4981</i>                    | Km, Nm         | This study |
| pTHS126 | pRL271 containing 1000 bp upstream and downstream of <i>fm7001</i> flanking <i>nptII</i>                                              | Km, Nm, Cm     | This study |
| pTHS127 | pRL278 containing 2000 bp upstream and downstream of <i>fm7001</i> flanking CS.3                                                      | Km, Nm, Sm, Sp | This study |
| pTHS128 | pRL278 containing 2000 bp upstream of <i>fm7001</i> and the first 398 bp of <i>fm7001</i>                                             | Km, Nm         | This study |
| pTHS129 | pRL278 containing 1000 bp upstream and downstream of <i>all4981</i> flanking CS.3                                                     | Km, Nm, Sm, Sp | This study |
| pTHS130 | pRL278 containing 151 bp upstream of <i>all4981</i> and the first 449 bp of <i>all4981</i>                                            | Km, Nm         | This study |
| pTHS131 | pJET1.2/blunt with ~1000 bp upstream and downstream of <i>slr1303</i> flanking CS.3 inserted by GIBSON assembly                       | Amp            | This study |
| pTHS132 | Circularized pUC ori with 1000 bp upstream and downstream of <i>slr1301</i> flanking <i>nptII</i> assembled by GIBSON assembly        | Km, Nm         | This study |
| pTHS133 | pJET1.2/blunt with ~1000 bp upstream and downstream of <i>syc1139</i> flanking <i>nptII</i> inserted by GIBSON assembly               | Amp            | This study |

1310 Sm: streptomycin resistance; Sp: spectinomycin resistance; Amp: ampicillin resistance, Km: kanamycin resistance,  
1311 Nm: neomycin resistance; Cm: chloramphenicol resistance.

- 1312
- 1313
- 1314
- 1315
- 1316
- 1) The eYFP is C-terminally followed by a myc-tag, which is then followed by a heptapeptide of glycine and serine. Abbreviated: *yfp*.
  - 2) Modified *gfpmut3.1* in which the internal NdeI site was removed by replacing CAT by the synonymous CAC codon. The GFP is N-terminally preceded by 12 alanine and serine residues. Abbreviated: *gfp*. (Stucken *et al.*, 2012).
