1 **Identification and characterization of novel filament-forming proteins in**  
2 **cyanobacteria**

3

4 Benjamin L. Springstein<sup>1†\*</sup>, Christian Woehle<sup>1‡</sup>, Julia Weissenbach<sup>1‡‡</sup>, Andreas O. Helbig<sup>2</sup>,  
5 Tal Dagan<sup>1</sup>, Karina Stucken<sup>3\*</sup>

6

7 <sup>1</sup> Institute of General Microbiology, Christian-Albrechts-Universität zu Kiel, Kiel, Germany

8 <sup>2</sup> Institute for Experimental Medicine, Christian-Albrechts-Universität zu Kiel, Kiel, Germany

9 <sup>3</sup> Department of Food Engineering, University of La Serena, La Serena, Chile.

10

11 † Present address: Department of Microbiology, Blavatnick Institute, Harvard Medical School,  
12 Boston, MA, 02115 USA

13 ‡ Present address: Max Planck Institute for Plant Breeding Research, Max Planck-Genome-  
14 Center Cologne, Cologne, Germany

15 ‡‡ Present address: Faculty of Biology, Technion-Israel Institute of Technology, Haifa, 32000,  
16 Israel

17

18 \* Corresponding authors: BLS: [benjamin\\_springstein@hms.harvard.edu](mailto:benjamin_springstein@hms.harvard.edu)  
19 KS: [kstucken@userena.cl](mailto:kstucken@userena.cl)

## 20 **Abstract**

21 Filament-forming proteins in bacteria function in stabilization and localization of proteinaceous  
22 complexes and replicons; hence they are instrumental for myriad cellular processes such as  
23 cell division and growth. Here we present two novel filament-forming proteins in cyanobacteria.  
24 Surveying cyanobacterial genomes for coiled-coil-rich proteins (CCRPs) that are predicted as  
25 putative filament-forming proteins, we observed a higher proportion of CCRPs in filamentous  
26 cyanobacteria in comparison to unicellular cyanobacteria. Using our predictions, we identified  
27 nine protein families with putative intermediate filament (IF) properties. Polymerization assays  
28 revealed four proteins that formed polymers *in vitro* and three proteins that formed polymers  
29 *in vivo*. Fm7001 from *Fischerella muscicola* PCC 7414 polymerized *in vitro* and formed  
30 filaments *in vivo* in several organisms. Additionally, we identified a tetratricopeptide repeat  
31 protein - All4981 - in *Anabaena* sp. PCC 7120 that polymerized into filaments *in vitro* and *in*  
32 *vivo*. All4981 interacts with known cytoskeletal proteins and is indispensable for *Anabaena*  
33 viability. Although it did not form filaments *in vitro*, Syc2039 from *Synechococcus elongatus*  
34 PCC 7942 assembled into filaments *in vivo* and a  $\Delta$ syc2039 mutant was characterized by an  
35 impaired cytokinesis. Our results expand the repertoire of known prokaryotic filament-forming  
36 CCRPs and demonstrate that cyanobacterial CCRPs are involved in cell morphology, motility,  
37 cytokinesis and colony integrity.

## 38 **Introduction**

39 Species in the phylum Cyanobacteria present a wide morphological diversity, ranging from  
40 unicellular to multicellular organisms. Unicellular cyanobacteria of the *Synechocystis* and  
41 *Synechococcus* genera are characterized by a round or rod-shaped morphology, respectively,  
42 and many strains are motile. Species of the Nostocales order are multicellular and differentiate  
43 specialized cells, known as heterocysts, which fix atmospheric nitrogen under aerobic  
44 conditions. Within the Nostocales, species of the Nostocaceae (e.g., *Anabaena*, *Nostoc*) form  
45 linear trichomes, while cells in the Hapalosiphonaceae and Chlorogloepsidaceae divide in  
46 more than one plane to form true-branching trichomes as in *Fischerella* or multiseriate

47 trichomes (more than one filament in a row) as in *Chlorogloeopsis* (Rippka *et al.*, 1979).  
48 Notably, cells within a single trichome of a multicellular cyanobacterium can differ in size, form  
49 or cell wall composition (Rippka *et al.*, 1979). Cells in the *Anabaena* sp. PCC 7120 (hereafter  
50 *Anabaena*) trichome are linked by a shared peptidoglycan sheet and an outer membrane (Wilk  
51 *et al.*, 2011). *Anabaena* cells communicate and exchange nutrients through intercellular cell-  
52 cell connections, called septal junctions, which are thought to comprise the septal junction  
53 proteins SepJ, FraC and FraD (Herrero, Stavans and Flores, 2016; Weiss *et al.*, 2019). SepJ  
54 is essential for the multicellular phenotype in *Anabaena* (Flores *et al.*, 2007; Nayar *et al.*, 2007).

55         Studies of the molecular basis of cyanobacterial morphogenesis have so far focused  
56 on the function of FtsZ and MreB, the prokaryotic homologs of tubulin and actin, respectively  
57 (Wagstaff and Löwe, 2018). FtsZ functions in a multi-protein complex called the divisome, and  
58 is known as a key regulator of cell division and septal peptidoglycan (PG) biogenesis (Bi and  
59 Lutkenhaus, 1991; Wagstaff and Löwe, 2018). FtsZ has been shown to be an essential cellular  
60 protein in *Anabaena* and in the coccoid cyanobacterium *Synechocystis* sp. PCC 6803  
61 (hereafter *Synechocystis*) (Zhang *et al.*, 1995). The FtsZ cellular concentration in *Anabaena* is  
62 tightly controlled by a so far undescribed protease (Lopes Pinto *et al.*, 2011). Apart from its  
63 function in cell division, the FtsZ-driven divisome also mediates the localization of SepJ  
64 (Ramos-León *et al.*, 2015). MreB functions in a multi-protein complex called the elongasome,  
65 where it is a key mediator of longitudinal PG biogenesis that controls the cell shape (Jones,  
66 Carballido-López and Errington, 2001; Wagstaff and Löwe, 2018). In cyanobacteria, MreB  
67 plays a role in cell shape determination in *Anabaena*, nonetheless, it is not essential for cell  
68 viability (Hu *et al.*, 2007). In contrast, in *Synechococcus* sp. PCC 7942 (hereafter  
69 *Synechococcus*) MreB is essential, where partially segregated mutants display a coccoid  
70 morphology resembling the morphology of *E. coli mreB* deletion strains (Kruse, Bork-Jensen  
71 and Gerdes, 2005; Jain, Vijayan and O'Shea, 2012).

72         Proteins resembling the eukaryotic intermediate filaments (IFs) have been discovered  
73 in several bacterial species and were shown to form filaments *in vitro* and *in vivo* and to impact

74 essential cellular processes (Lin and Thanbichler, 2013). IF proteins exhibit an intrinsic  
75 nucleotide-independent *in vitro* polymerization capability that is mediated by the high frequency  
76 of coiled-coil-rich regions in their amino acid sequence (Shoeman and Traub, 1993; Fuchs and  
77 Weber, 1994; Löwe and Amos, 2009; Wagstaff and Löwe, 2018). Eukaryotic IF proteins are  
78 generally characterized by a conserved domain buildup consisting of discontinuous coiled-coil  
79 segments that form a central rod domain. This rod domain is N- and C-terminally flanked by  
80 globular head and tail domains of variable length (Fuchs and Weber, 1994; Herrmann *et al.*,  
81 1996; Herrmann and Aebi, 2004). Crescentin is a bacterial IF-like CCRP from *Caulobacter*  
82 *crescentus*, which exhibits a striking domain similarity to eukaryotic IF proteins. Crescentin  
83 filaments that align at the inner cell curvature are essential for the typical crescent-like cell  
84 shape of *C. crescentus*; possibly, by locally exerting a constriction force which coordinates the  
85 MreB-driven peptidoglycan (PG) synthesis machinery (Ausmees, Kuhn and Jacobs-Wagner,  
86 2003; Cabeen *et al.*, 2009; Charbon, Cabeen and Jacobs-Wagner, 2009). Reminiscent of  
87 eukaryotic IF proteins, Crescentin was found to assemble into filamentous structures *in vitro*  
88 in a nucleotide-independent manner (Ausmees, Kuhn and Jacobs-Wagner, 2003). However,  
89 so far no Crescentin homologs have been found in other bacteria, indicating that non-spherical  
90 or rod-shaped prokaryotic morphologies are putatively controlled by other polymerizing  
91 proteins (Bagchi *et al.*, 2008; Wickstead and Gull, 2011). Apart from Crescentin, many other  
92 coiled-coil-rich proteins (CCRP) with IF-like functions have been identified to polymerize into  
93 filamentous structures and to perform cytoskeletal-like roles; however, none of them  
94 resembled the eukaryotic IF domain architecture (reviewed by Lin & Thanbichler, 2013).  
95 Examples are two proteins from *Streptomyces coelicolor* whose function has been studied in  
96 more detail: FilP and Scy (Bagchi *et al.*, 2008; Walshaw, Gillespie and Kelemen, 2010; Holmes  
97 *et al.*, 2013). Gradients of FilP localize at the tip of a growing hyphae and contribute to cellular  
98 stiffness (Bagchi *et al.*, 2008). Scy forms patchy clusters at the sites of novel tip-formation and,  
99 together with the scaffolding CCRP DivIVA, orchestrates the polar hyphal growth (Holmes *et*  
100 *al.*, 2013). Together with FilP and a cellulose-synthase, these proteins form the polarisome,  
101 which guides peptidoglycan biogenesis and hyphal tip growth in *S. coelicolor* (Flärdh *et al.*,

102 2012; Hempel *et al.*, 2012; Holmes *et al.*, 2013). Another example are four CCRPs in the  
103 human pathogen *Helicobacter pylori*, which were found to assemble into filaments *in vitro* and  
104 *in vivo*, with a function in determination of the helical cell shape as well as cell motility (Waidner  
105 *et al.*, 2009; Specht *et al.*, 2011). Consequently, filament-forming CCRPs with essential cellular  
106 functions have been found in numerous prokaryotes having various cellular morphologies. The  
107 presence of filament-forming CCRPs in cyanobacteria is so far understudied. Here we search  
108 for CCRPs with presumed IF-like functions in cyanobacteria using a computational prediction  
109 of CCRPs. Putative filament-forming proteins were further investigated experimentally by  
110 structural analyses and *in vitro* and *in vivo* localization assays in morphologically diverse  
111 cyanobacteria.

## 112 **Results**

### 113 **Coiled-coil-rich proteins are widespread in cyanobacteria**

114 For the computational prediction of putative filament-forming proteins, we surveyed 364  
115 cyanobacterial genomes including 1,225,314 protein-coding sequences (CDSs) for CCRPs.  
116 All CDSs in the cyanobacterial genomes were clustered by sequence similarity into families  
117 of homologous proteins (see Methods). The frequency of CCRPs in each CDS was calculated  
118 using the COILS algorithm (Lupas, Van Dyke and Stock, 1991). The algorithm yielded a list of  
119 28,737 CDSs with high coiled-coil content ( $\geq 80$  amino acids in coiled-coil conformation;  
120 Supplementary File 1). CCRPs were predicted in 158,466 protein families covering all  
121 cyanobacterial species. To examine the overall distribution of CCRPs in cyanobacterial  
122 genomes, we investigated 1,504 families of homologous proteins that include at least three  
123 CCRP members (Fig. 1). Notably, most protein families (1,142; 76%) include CCRP and non-  
124 CCRP members, indicating that protein properties might differ among homologous proteins.  
125 The presence/absence pattern of families including CCRPs further shows that those are less  
126 abundant in picocyanobacterial genomes (SynProCya group) in comparison to the remaining  
127 species in the phylum. Furthermore, the proportion of CCRPs in the genome is significantly  
128 higher in multicellular cyanobacteria in comparison to unicellular cyanobacteria ( $P=2.65 \times 10^{-46}$ )

129 using Kruskal-Wallis test and Tukey test with  $\alpha=0.05$ ). This indicates that a high frequency of  
130 CCRPs is one characteristic of multicellular cyanobacteria.

131 For the experimental validation, the complete list of CCRPs was filtered to include  
132 candidates from freshwater unicellular and filamentous cyanobacteria that are genetically  
133 accessible, including *Thermosynechococcus elongatus* BP-1 (*Thermosynechococcus*),  
134 *Synechocystis*, *Synechococcus*, *Anabaena* and *Fischerella muscicola* PCC 7414  
135 (*Fischerella*). In addition to cytoskeleton functions, coiled-coils are common motifs of proteins  
136 involved in other cellular processes such as transcription, the extracellular matrix, chemotaxis  
137 and host–pathogen interactions (Rackham *et al.*, 2010). Consequently, the remaining CCPRs  
138 were further sorted to include proteins having similar properties to known prokaryotic IF-like  
139 CCRPs (e.g., crescentin, FilP) and are annotated as hypothetical proteins with an unknown  
140 function. Additionally, proteins lacking an unstructured N-terminal head and C-terminal tail  
141 domain, which are characteristics of prokaryotic IF-like proteins (Bagchi *et al.*, 2008), were  
142 excluded. Furthermore, proteins with an assigned function or predicted to be involved in other  
143 cellular processes were excluded (using publicly available online bioinformatic tools: NCBI  
144 Blast, NCBI CD search, PSORTb, TMHMM, InterPro, PSIPRED and I-TASSER). In the  
145 screening for protein characteristics and annotation, Crescentin, FilP and other eukaryotic IF  
146 proteins (e.g., Vimentin and Desmin) were chosen as reference for our predictions, where  
147 proteins displaying similar results were favored. An additional *Fischerella* CDS, Fm7001, was  
148 added to the list as earlier analyses suggested that it has a cell shape-determining function.  
149 The preliminary filtration resulted in a list of nine candidates, which we investigated  
150 experimentally here (Fig. 1C,D and Supplementary Table 1).

151 Candidate coding sequences varied in size and ranged from ca. 280 amino acids  
152 (Synpcc7942\_2039, abbreviated Syc2039) to ca. 650 amino acids (All4981). The coiled-coil  
153 domain distribution was variable among the candidates in both coiled-coil domain count and  
154 length (Fig. 1D). Only Slr7083 exhibited a somewhat characteristic domain architecture of  
155 eukaryotic IF proteins, whereas the coiled-coil domain distribution in the other candidates had

156 major differences in coiled-coil domain number and lengths. None of the predicted CCRPs  
157 exhibited a stutter-like structure in the last coiled-coil segment. Besides coiled-coil domains,  
158 the COILS algorithm also predicted tetratricopeptide repeats (TPRs) as coiled-coils, thus we  
159 also included All4981 into our analysis, even though conserved domain searches reliably  
160 predicted these domains as TPRs and not coiled-coils. Many protein candidates contained  
161 conserved domains from eukaryotic IF proteins, found in Crescentin and FilP or from the  
162 bacterial cell division protein EzrA (Supplementary Table 1). The presence of these domains  
163 may be regarded as support for our classification. Additionally, structural maintenance of  
164 chromosomes (SMC) domains were predicted in almost all chosen candidates, all eukaryotic  
165 IF proteins as well as in Crescentin and FilP (Supplementary Table 1). The MscS\_TM domain  
166 from Desmin was found in Slr7083 and Tlr0420 contains a Neuromodulin\_N as well as a  
167 CCDC158 domain, both present in FilP or Crescentin, respectively.

168         The presence of homologs across all cyanobacterial morphotypes serves as a hint for  
169 universal protein function while a restricted distribution in specific subsections or morphotypes  
170 indicates a functional specialization within the respective taxon. An example for such species-  
171 specific candidate in our list is *slr7083* that is encoded on the pSYSA toxin-antitoxin plasmid  
172 in *Synechocystis*, similarly to *parM* and *tubZ*, which mediate plasmid segregation (Larsen *et*  
173 *al.*, 2007; Bharat *et al.*, 2015). In contrast, the homologous proteins Synpcc7942\_1139  
174 (abbreviated Syc1139) and Slr1301 are highly conserved and have homologs among all  
175 cyanobacterial groups (Fig. 1), including CypS from *Anabaena*, which we previously identified  
176 as a filament-forming CCRP (Springstein *et al.*, 2019). As our candidate CCRPs annotated as  
177 hypothetical proteins, we initially verified the transcription of the respective genes by RT-PCR  
178 from cDNA (Supplementary Fig. 1A-D). Our results showed that *slr7083* was only weakly  
179 transcribed during mid-exponential culture growth phase and *all4981* was found to be  
180 transcribed in an operon with its upstream genes *all4982* and *all4983* (Supplementary  
181 Fig. 1B,C).

## 182 **Cyanobacterial CCRPs assemble into diverse filamentous structures *in vitro***

183 A major characteristic of filament-forming proteins is their ability to self-polymerize into  
184 filaments intra and extracellularly (Fuchs and Weber, 1994; Köster *et al.*, 2015). Unlike actin  
185 and tubulin, IFs are able to form filamentous structures *in vitro* in a nucleotide-independent  
186 manner without additional co-factors upon renaturation from a denaturing buffer (Köster *et al.*,  
187 2015). To examine the self-polymerization property of the nine tested CCRPs, we purified His<sub>6</sub>-  
188 tagged CCRPs under denaturing conditions and subjected them to subsequent renaturation  
189 by dialysis. Here we used protein concentrations in a similar range (0.5-1 mg ml<sup>-1</sup>) to previously  
190 investigated proteins shown to form filaments *in vitro* (e.g., Crescentin (Ausmees, Kuhn and  
191 Jacobs-Wagner, 2003) and Scc (England *et al.*, 2005), the metabolic enzyme CtpS (Ingerson-  
192 Mahar *et al.*, 2010) and the bactofilins BacA, BacB (Kühn *et al.*, 2010) and BacM (Koch,  
193 McHugh and Hoiczky, 2011)). When applicable, the purified proteins were labeled with NHS-  
194 Fluorescein and the formation of *in vitro* filaments was assessed by epifluorescence or bright  
195 field microscopy. Several candidates did not form discernible structures *in vitro* and were  
196 consequently excluded from further investigation (including Slr6096, Tlr0420 and Fm6009;  
197 Supplementary Fig. 2A). The remaining CCRPs assembled into highly diverse structures *in*  
198 *vitro* (Fig. 2). Direct dialysis of Fm7001 from a high urea-containing buffer to a physiological  
199 buffer led to protein precipitation. However, upon slow stepwise renaturation (removing 0.5 M  
200 every 2 h), Fm7001 polymerized into a flat two-dimensional sheet floating on top of the  
201 dialysate in 4,5 M urea (Supplementary Fig. 2D). We addressed the eventuality that these  
202 structures could be the product of crystalized urea, but control experiments did not reveal  
203 filaments. Polymerized Fm7001 revealed two-dimensional filamentous sheets as well as single  
204 filamentous fibers (Fig. 2). Similar structures were observed for purified Fm7001-GFP and  
205 MBP-Fm7001-His<sub>6</sub> (Supplementary Fig 2E,F). A two-dimensional filamentation pattern was  
206 observed also for Slr7083, which formed single, long and straight filamentous strings that were  
207 interconnected by two-dimensional sheets, thereby producing an irregular net (Fig. 2).  
208 Similarly, All4981 assembled into an interconnected filamentous net with thin single filaments  
209 (Fig. 2). The heterologous expression of Syc2039-His<sub>6</sub> in *E. coli* failed, but we successfully



210 purified Syc2039-GFP-His<sub>6</sub> from *Synechococcus* instead. The polymerization pattern of  
211 Syc2039-GFP-His<sub>6</sub> revealed sphere or cell shape-like three-dimensional sheets (Fig. 2).  
212 However, we note that most of the protein precipitated upon renaturation, hence it is unlikely  
213 that Syc2039 has *in vitro* polymerizing properties. Syc1139 polymerized into similar cell shape-  
214 like three-dimensional sheets but without any detectable aggregates (Fig. 2). The resemblance  
215 between Syc2039 and Syc1139 sheets raised the possibility that the sheet-like structures  
216 observed in the Syc2039-GFP-His<sub>6</sub> sample represented co-precipitated and polymerized  
217 Syc1139. In accordance with this suggestion, we identified direct interactions of Syc1139 and  
218 Syc2039 using the bacterial adenylate cyclase two-hybrid (BACTH) assays (Supplementary  
219 Fig. 3A). For Slr1301, no clear *in vitro* structures were observed (Fig. 2). Nonetheless, we  
220 included this protein in further analyses since its homolog in *Anabaena* (CypS) has been  
221 recently reported as a filament-forming protein (Springstein *et al.*, 2019). Notably, Crescentin,  
222 which we used as a positive control, polymerized into smooth and filigree filaments only in the  
223 presence of monovalent ions (i.e. NaCl; Supplementary Fig. 2B). This observation highlights  
224 the importance of suitable buffer conditions for the detection of filament-forming proteins. To  
225 further confirm our *in vitro* observations, we included the monomeric and highly soluble maltose  
226 binding protein (MBP) as well as the oligomeric proteins GroEL1.2 (from *Chlorogloeopsis*  
227 *fritschii* PCC 6912; (Weissenbach *et al.*, 2017)) and the UMP kinase (from *Anabaena*) as  
228 negative controls. While both, the MBP and the UMP kinase readily clumped into comparably  
229 small aggregates, GroEL1.2 formed large proteinaceous aggregates *in vitro*, likely as a result  
230 of uncoordinated multimerization (Supplementary Fig. 2C). Consequently, we conclude that  
231 the *in vitro* filaments of the cyanobacterial CCRPs we observed here are unlikely to be  
232 oligomerization artifacts. We further validated the self-binding properties of the remaining six  
233 CCRPs using the BACTH assay and found that all proteins are able to self-interact  
234 (Supplementary Fig. 3A).

235 **Putative filament-forming proteins form filaments *in vivo***

236 To investigate whether the genetic background influences the filamentation properties of the  
237 candidate proteins, we expressed GFP or YFP translational fusion constructs of the putative  
238 filament-forming CCRPs in multiple hosts: 1) *E. coli*, 2) their native cyanobacterium and 3) in  
239 cyanobacteria of a different morphotype or subsection. Gene expression was driven by  
240 inducible or constitutive promoters commonly used in cyanobacteria. These included P<sub>cpc560</sub>  
241 (for *Synechocystis*) (Zhou *et al.*, 2014), P<sub>trc</sub> (for *E. coli*, *Synechocystis* and *Synechococcus*)  
242 (Huang *et al.*, 2010) or P<sub>petE</sub> (for *Anabaena* and *Fischerella*) (Buikema and Haselkorn, 2001).  
243 As a positive control for *in vivo* filamentation, we expressed Crescentin-GFP in *Anabaena*,  
244 which formed round and helical filaments in the cells, thereby showing that P<sub>petE</sub> is suitable for  
245 studying filament-forming IF-like CCRPs in *Anabaena*. (Supplementary Fig. 4A).

246 **Fm7001 forms protein filaments *in vivo* independent of the host**

247 The *in vivo* localization of Fm7001 in *Fischerella* showed different results depending on the tag  
248 orientation. Only the expression of N-terminal YFP fusions of Fm7001 resulted in filamentous  
249 structures (Fig. 3 and Supplementary Fig. 4B). In *Synechocystis*, YFP-Fm7001 formed  
250 filaments throughout the cell (Fig. 3A) while in *Anabaena* we observed septum-arising  
251 filamentous strings (Fig. 3B). In its host, *Fischerella*, YFP-Fm7001 only rarely assembled into  
252 short filamentous strings (Fig. 3C inlays). Despite of the low abundance of filaments in  
253 *Fischerella*, induction of heterologous expression of YFP-Fm7001 induced an altered cell  
254 phenotype and trichomes seemingly divided in more than one plane resulting in a multiseriate  
255 (more than one trichome in a row) phenotype characteristic of *C. fritschii*. While under non-  
256 inducing conditions (i.e. in the absence of copper), *Fischerella* cells carrying a plasmid that  
257 expresses YFP-Fm7001 from P<sub>petE</sub> had a WT phenotype, an altered morphotype and  
258 multiseriate growth was observed after around 4 rounds of replication (i.e. after 7 d) under  
259 inducing conditions (Fig. 3C). We also observed that, although expressed from a non-native  
260 promoter, YFP-Fm7001 was initially localized at branching points (Fig. 3C, 19 h after  
261 induction). Those effects suggest that Fm7001 may be involved in cell shape control and in

262 the true-branching phenotype of *Fischerella*. Our attempts to generate a *Fischerella*  $\Delta fm7001$   
263 mutant strain remained unsuccessful, hence the function of Fm7001 remains unknown.

#### 264 **Slr7083 and Slr1301 are involved in twitching motility in *Synechocystis***

265 The *in vivo* localization of Slr7083-GFP in *Synechocystis* showed that it was localized to the  
266 cell periphery as well as rare focal spots and S-shaped filaments (Fig. 4A). We also attempted  
267 to localize Slr7083-GFP in the motile *Synechocystis* PCC-M substrain (hereafter PCC-M) but  
268 never obtained any successfully transformed clone, suggesting that overrepresentation of  
269 Slr7083 is deleterious for this strain. The localization of Slr1301-YFP in *Synechocystis* and  
270 PCC-M was at indistinct peripheral sites as assemblies of crescent-like shapes and rarely as  
271 S-shaped filaments (Fig. 4A and Supplementary Fig. 4C). Similar structures have been  
272 previously reported for the pilus ATPase PilB (Schuergers *et al.*, 2015). The localization of  
273 Slr7083-GFP and YFP-Slr7083 in *Anabaena* was at the cell periphery (Supplementary Fig.  
274 4D). Furthermore, extended expression of YFP-Slr7083 in *Anabaena* altered the cellular  
275 morphology and disturbed the linear *Anabaena* trichome growth pattern (Supplementary Fig.  
276 4E). In *E. coli*, Slr7083-GFP localized next to the cell poles (Supplementary Fig. 1E). When  
277 expressed in *E. coli*, Slr1301-GFP revealed a similar polar localization (Supplementary Fig.  
278 1E). Additionally, reminiscent of Slr7083, the heterologous expression of Slr1301-YFP in  
279 *Anabaena* had an effect on the *Anabaena* cell-shape where it localized at the periphery and  
280 also formed single filaments or thick filamentous bundles that seemingly traversed through  
281 several cells (Supplementary Fig. 4C). To further assess the role of Slr1301 and Slr7083 in  
282 *Synechocystis* motility, we generated *Synechocystis* and PCC-M  $\Delta slr7083$  and  $\Delta slr1301$   
283 mutant strains. The *Synechocystis*  $\Delta slr7083$  and  $\Delta slr1301$  mutants revealed no phenotypic  
284 defects compared to the WT (Fig. 4B,C). In contrast, the PCC-M  $\Delta slr7083$  mutant is  
285 characterized by a decrease in twitching motility and a defect in cytokinesis (Fig. 4B). PCC-M  
286  $\Delta slr7083$  mutant cells often lacked internal chlorophyll signal entirely and failed to properly  
287 divide internal thylakoid membrane (assessed by the lack of chlorophyll autofluorescence)  
288 during cell division (Fig. 4B). Similarly, the PCC-M  $\Delta slr1301$  mutant lost its twitching motility

289 (Fig. 4B; confirming previous results from Bhaya, Takahashi, Shahi, & Arthur (2001)). Attempts  
290 to complement the motility defect in the PCC-M  $\Delta slr1301$  mutant by expressing Slr1301-YFP  
291 from the conjugation plasmid pRL153 failed, possibly as a result of the comparably high  
292 expression of Slr1301-YFP from  $P_{trc}$  (we note that  $P_{trc}$  cannot be regulated by IPTG in  
293 *Synechocystis*). Additional attempts to complement the PCC-M  $\Delta slr7083$  mutant never  
294 resulted in exconjugants. In order to further explore how Slr1301 affects motility, we analyzed  
295 co-precipitated proteins of Slr1301-YFP expressed in *Synechocystis* by mass spectrometry.  
296 This revealed multiple putative interaction partners involved in motility, including a twitching  
297 motility protein (Slr0161), two methyl-accepting chemotaxis proteins (McpA and PilJ) and the  
298 type IV pilus assembly ATPase PilB (Fig. 4D). The interaction of Slr1301 with PilB, together  
299 with their similar *in vivo* localization, prompted us to characterize the interaction of both  
300 proteins. For this purpose, we attempted to express PilB-GFP in *Synechocystis* WT, and in the  
301  $\Delta slr1301$  and  $\Delta slr7083$  mutants. In *Synechocystis* WT, PilB-GFP localized to the cell periphery  
302 and often formed crescent-like formations (reminiscent of Slr1301-YFP and Slr7083-GFP; Fig.  
303 4A), confirming previous results by Schuergers *et al.* (2015). However, we never observed any  
304 PilB-GFP expression in the *Synechocystis* or PCC-M  $\Delta slr7083$  and  $\Delta slr1301$  mutants. The  
305 similarity between our observations so far for Slr1301 and Slr7083 led us to test for an  
306 interaction between these two proteins. Indeed, a bacterial two-hybrid assay confirmed a direct  
307 interaction between Slr7083 and Slr1301 (Fig. 4E). Taken together, our investigation identified  
308 two *Synechocystis* CCRPs that are involved in cell motility. Slr7083 is a cell envelope-localized  
309 protein involved in cytokinesis and motility. It polymerized into filaments *in vitro* but only few  
310 filaments were identified *in vivo*. Slr1301, although failing to assemble into filaments *in vitro*,  
311 occasionally polymerized into filaments *in vivo* and was found to be an interaction partner of  
312 proteins that function in *Synechocystis* twitching motility.

### 313 **All4981 is an *Anabaena* TPR protein that forms septal-arising filaments**

314 The expression of All4981-GFP in *Anabaena* revealed numerous filaments that traversed the  
315 cell while in other cells All4981-GFP was associated with the cell septa (Fig. 5A). All4981-GFP

316 filaments also occasionally spread in a star-like pattern into the cytosol. Additionally, in freshly  
317 ruptured All4981-GFP-expressing cells, filamentous *ex vivo* structures assembled in the  
318 medium into an interconnected network (Supplementary Fig. 4F), resembling the *in vitro*  
319 polymerization pattern of All4981 (Fig 2). We confirmed a host-independent *in vivo*  
320 polymerization capacity of All4981 by expressing All4981-GFP in *Synechocystis*, which lacks  
321 homologs to that protein (Fig. 5B). Intrigued by the septal localization, we tested for an  
322 interaction with SepJ, a septal junction protein in *Anabaena* (Flores *et al.*, 2007) and found  
323 weak, albeit significant physical interactions (Supplementary Fig. 3A). In addition, bacterial  
324 two-hybrid assays revealed that All4981 interacted with two other *Anabaena* filament-forming  
325 CCRPs, namely LfiA and LfiB (Springstein *et al.*, 2019), and strongly interacted with the cell  
326 shape-determining protein MreB (Supplementary Fig. 3A). Notably, MreB has previously been  
327 shown to form similar filamentous structures in *Anabaena*. However, in contrast to genes in  
328 the *mreBCD* operon, whose overexpression induces abnormal cell morphologies (Hu *et al.*,  
329 2007), no direct morphogenic influence was detected for All4981 in *Anabaena*. Notably, it is  
330 likely that All4981 is an essential protein in *Anabaena* as we were not able to generate an  
331 *all4981* deletion strain. Initially, we accidentally also created a YFP-All4981 fusion construct with  
332 a deletion of 240 bp between nt 735 and nt 975 of the *all4981* CDS, resulting in a deletion of  
333 the third and fourth TPR (YFP-All4981<sup>ΔTPR3-4</sup>) leaving the remaining ORF intact. Remarkably,  
334 this fusion protein, like All4981-GFP, formed cell-traversing filaments in *Anabaena* and  
335 sometimes assembled into a filamentous structure within the cells (Supplementary Fig. 4G). In  
336 contrast, full length YFP-All4981 localized to the septa between two neighboring cells but also  
337 revealed indistinct cytosolic localization (Supplementary Fig. 4G). Co-immunoprecipitation  
338 experiments following LC-MS/MS analytics from *Anabaena* WT expressing YFP-All4981<sup>ΔTPR3-</sup>  
339 <sup>4</sup> revealed an association of YFP-All4981<sup>ΔTPR3-4</sup> with ParB, MinD and MreB (Fig. 5C). Thus,  
340 All4981 might be involved in ParA/B/S-driven plasmid or chromosome segregation. The  
341 interaction with MreB agrees with the *in vivo* localization of YFP-All4981<sup>ΔTPR3-4</sup> in *Anabaena*  
342 (Supplementary Fig. 4G) and the results from the bacterial two-hybrid assay (Supplementary  
343 Fig. 3A). Further interactions were found with a variety of putative S-layer and prohibitin-like

344 proteins and with DevH, an essential protein for heterocyst glycolipid layer synthesis. Notably,  
345 we never observed All4981 expression in heterocysts, regardless of the fluorescence tag.  
346 All4981 also interacted with All4982, a protein encoded directly upstream of *all4981*, but not  
347 with All4983, which is encoded upstream of *all4982* (Supplementary Fig. 1C). This observation,  
348 together with the common transcript of *all4981* and *all4982* (Supplementary Fig. 1C) argues  
349 for a common function of both proteins. Thus, we attempted to localize All4982 with an eCFP  
350 tag in *Anabaena* but could not observe a coherent localization pattern. Overall, our results  
351 demonstrate that All4981 is connected to other *Anabaena* filament-forming CCRPs, the MreB  
352 cytoskeleton, the septal junctions and the protective S-layer. Additionally, All4981 polymerizes  
353 *in vitro*, *in vivo* and *ex vivo*, is likely essential for *Anabaena* and is thus accordingly classified  
354 as a novel cyanobacterial filament-forming TPR-repeat protein.

### 355 ***Synechococcus* CCRPs are involved in cytokinesis and colony integrity**

356 The results of the *in vivo* localization of a functional Syc2039-GFP fusion protein  
357 (Supplementary Fig. 5E,F) contrasted the ambiguous *in vitro* polymerization pattern (Fig. 2).  
358 Filaments were readily observed in different cyanobacterial hosts, indicating that in Syc2039  
359 self-polymerization is independent of the host (Fig. 6A). Notably, however, Syc2039 formed  
360 different structures in each host. In *Anabaena*, filaments were long, curved and intertwined; in  
361 *Synechocystis* filaments appeared as spindle-like structures and in *Synechococcus* filaments  
362 were long, sometimes helical and often aligned with or in close proximity to the cell envelope  
363 (Fig. 6A). A similar helical or cell periphery-aligned localization pattern was also observed in  
364 *E. coli* (Supplementary Fig. 1E). In *Synechocystis* and *Synechococcus* Syc1139-GFP localized  
365 as spots at the cell periphery, while in *E. coli* it seemingly coated the entire cell envelope (Fig.  
366 6A, Supplementary Fig. 1E). Syc1139-GFP failed to be expressed in *Anabaena*, suggesting  
367 that (over-)expression of this protein has a negative impact on that organism. Using double  
368 homologous gene replacement, we generated a *Synechococcus*  $\Delta$ *syc2039* mutant strain and  
369 a non-segregated *Synechococcus*  $\Delta$ *syc1139* mutant strain (Supplementary Fig. 5A-C). The  
370 non-segregated nature of the  $\Delta$ *syc1139* mutant suggests that this gene performs an essential

371 cellular function and cannot be fully deleted. Colony integrity of the  $\Delta syc2039$  mutant was  
372 unaltered while the  $\Delta syc1139$  mutant was characterized by apparent changes in colony  
373 morphology (Fig. 6B), which were lost upon growth on non-selective plates (Supplementary  
374 Fig. 5D). Additionally, both mutants presented an impairment in liquid culture growth: the  
375  $\Delta syc2039$  mutant grew in standard BG11 medium but failed to grow upon addition of several  
376 osmotic stressors, whereas the  $\Delta syc1139$  mutant failed to grow in liquid culture entirely (Fig.  
377 6C). Spot assays confirmed a decreased viability of the  $\Delta syc1139$  mutant and showed that it  
378 is highly sensitive to Proteinase K but unaffected by lysozyme (Supplementary Fig. 6A). These  
379 cell wall defects, together with the *in vitro* cell shape-like filamentation pattern suggest that  
380 Syc1139 might form a protective and protease-resistant proteinaceous layer below the  
381 cytoplasmic membrane. This possibility would also be in concert with the distorted colony  
382 morphology of the non-segregated  $\Delta syc1139$  mutant strain. The  $\Delta syc2039$  mutant was  
383 unaffected by cell wall and membrane destabilizers (Supplementary Fig. 6B). To investigate  
384 the role of these proteins in cell division, we stained intracellular DNA with DAPI and  
385 localization of FtsZ was detected by immunofluorescence in *Synechococcus* WT and both  
386 mutant strains. A proportion of  $\Delta syc2039$  mutant cells exhibited a segregated DNA distribution  
387 either to both cell poles or to just one pole (Fig. 6D). Furthermore, some cells of both mutants  
388 lacked any discernible intracellular DNA or perceptible chlorophyll signal and were elongated  
389 compared to the WT (Fig. 6D,E). The WT phenotype of the  $\Delta syc2039$  mutant could be rescued  
390 by insertion of  $P_{trc}::syc2039-gfp$  or  $P_{syc2039}::syc2039$  into the neutral NS1 (Bustos and Golden,  
391 1992) locus (Supplementary Fig. 5E,F). Although both mutant cells were elongated compared  
392 to WT cells (Fig. 6E), the intracellular localization of FtsZ was unaffected (Supplementary Fig.  
393 6C). And despite the defect in cytokinesis, the  $\Delta syc2039$  mutant strain revealed similar liquid  
394 culture growth properties as the WT (Supplementary Fig. 6D). Taken together, Syc2039 forms  
395 abundant filamentous networks *in vivo* and is involved in cytokinesis or cell cycle control. We  
396 could further show that *syc1139* is an essential gene important for cytokinesis, cellular integrity  
397 and colony formation, implicating structural functions.

## 398 Discussion

399 Earlier studies suggested that there is likely a broad spectrum of coiled-coil-rich and rod-  
400 domain containing proteins with IF-like function in prokaryotes (Bagchi *et al.*, 2008). And  
401 indeed, reports on such proteins followed with the discovery of Scy (in *Streptomyces coelicolor*)  
402 and several CCRPs from *Helicobacter pylori* (Waidner *et al.*, 2009; Walshaw, Gillespie and  
403 Kelemen, 2010; Specht *et al.*, 2011; Holmes *et al.*, 2013). Here we further investigated the  
404 presence and function of CCRPs with filament-forming IF-like properties in prokaryotes, by  
405 predicting and evaluating CCRPs in cyanobacteria. Our *in vitro* polymerization assay allowed  
406 for a rapid detection of protein filaments *in vitro* using fluorescence microscopy thus bypassing  
407 the need to investigate filament-formation by laborious electron microscopy procedures. The  
408 observed protein filament lengths were in the range of previously described *in vitro* filaments  
409 of FtsZ (Camberg, Hoskins and Wickner, 2009) and of the human prion protein in its amyloid  
410 form (Bocharova *et al.*, 2005) that were obtained by a similar experimental procedure.

411 Our results show that Fm7001 assembles into polymers *in vitro* upon renaturation from  
412 urea as well as *in vivo*, and that this protein has an impact on cellular and trichome morphology,  
413 thereby fulfilling major IF criteria (Köster *et al.*, 2015; Kelemen, 2017). Consequently, we  
414 propose that Fm7001 constitutes a novel filament-forming CCRP specific to multicellular, cell-  
415 differentiating and branching cyanobacteria. The floating Fm7001 polymer sheet in high molar  
416 urea (i.e. 4.5 M urea) indicates an exceptionally high self-association capacity of Fm7001. In  
417 comparison, the eukaryotic IF protein Vimentin exists only as tetramers in 5 M urea (Herrmann  
418 *et al.*, 1996). *In vivo* localization experiments revealed an essential role of the Fm7001 C-  
419 terminus for filamentation, which is a common observation for known prokaryotic filament-  
420 forming proteins, including MreB (Swulius and Jensen, 2012), Crescentin (Ausmees, Kuhn and  
421 Jacobs-Wagner, 2003) as well as eukaryotic IF proteins (Geisler and Weber, 1982; Weber and  
422 Geisler, 1982; Traub and Vorgias, 1983; Nakamura *et al.*, 1993; Herrmann *et al.*, 1996).  
423 Additionally, the assigned structural similarities of Fm7001 with the acetyl-CoA-carboxylase  
424 may provide further support for the theory that filament-forming proteins originated from



425 metabolic enzymes that obtained polymerization features (Ingerson-Mahar and Gitai, 2012).  
426 Notwithstanding, the metabolic activity of Fm7001 was not evaluated in our study hence its  
427 presumed enzymatic activity remains to be tested. Additionally, so far, no sufficient genome  
428 modification systems exist for *Fischerella* (Stucken *et al.*, 2012; Stucken, Koch and Dagan,  
429 2013), as such a precise analysis of the function of Fm7001 is currently not possible.

430         Several prokaryotic tubulin-like and actin-like cytoskeletal proteins, such as ParM and  
431 TubZ, are known to be encoded on plasmids or on bacteriophages (Hurme *et al.*, 1994;  
432 Wagstaff and Löwe, 2018). In *Synechocystis*, *slr7083* is encoded on the large toxin-antitoxin  
433 defense plasmid (pSYSA) (Kopfmann and Hess, 2013), thus it adds another protein to the list  
434 of those filament-forming CCRPs carried by an autonomously replicating genetic element.  
435 Preliminarily we suspected that Slr7083 has a role in plasmid-segregation similar to ParM.  
436 However, Slr7083 showed no indications of dynamic properties, which would be indispensable  
437 for a plasmid segregation mechanism. Furthermore, unlike ParM (Carballido-Lopez, 2006),  
438 Slr7083 did not localize in a spindle-like pattern *in vivo* and was only expressed at later growth  
439 phases, which is contradictory to a possible involvement in the cell cycle. In contrast, the  
440 polymers formed by Slr7083 *in vitro* and *in vivo* rather suggest that it could form a  
441 proteinaceous layer below the cytoplasmic membrane. Notably, Slr7083 *in vitro* structures  
442 resemble the nuclear lamina formed by nuclear lamins and FilP lace-like *in vitro* filaments  
443 (Stuurman, Heins and Aebi, 1998; Bagchi *et al.*, 2008; Fuchino *et al.*, 2013). It is thus  
444 conceivable that Slr7083 has a role in cellular stiffness as well as rigidity and mediates  
445 mechanical cell stabilization. However, restriction of transcription to only a comparably short  
446 period of the culture growth phase challenges the idea of a cell-stabilizing function for Slr7083.  
447 In contrast, cell motility in *Synechocystis* seems to be partially regulated by Slr7083,  
448 reminiscent of the role of the actin cytoskeleton in eukaryotes.

449         The role of Slr7083 in cell motility is possibly mediated by means of its interaction with  
450 Slr1301, which has already previously been shown to be essential for twitching motility in  
451 *Synechocystis* (Bhaya *et al.*, 2001). So far it is unknown how photoreceptors transduce the

452 perceived light stimuli to the motility apparatus in *Synechocystis* ultimately resulting in  
453 phototactic movements (Schuergers, Mullineaux and Wilde, 2017). It is tenable to hypothesize  
454 that Slr1301 might constitute the missing link between the two systems, possibly in  
455 combination with Slr7083. This hypothesis is supported by the physical interaction of Slr1301  
456 with PilB and the *in vivo* localization of Slr1301 that is similar to that observed for PilB  
457 (Schuergers *et al.*, 2015). A comparable complex was observed in *Pseudomonas aeruginosa*,  
458 where FimL (a proposed scaffolding protein with a weakly predicted coiled-coil) was shown to  
459 connect the chemosensory receptor system to the type IV pili apparatus, regulating the  
460 chemotactic and virulence pathways (Inclan *et al.*, 2016). In eukaryotes, cellular motility is  
461 strongly dependent on cytoskeletal proteins (Cappuccinelli, 1980), thus it is possible that  
462 filament-forming proteins are also key factors for cell locomotion in prokaryotes. Although IFs  
463 do not directly participate in cell motility in eukaryotes (Lodish *et al.*, 2000), an adaptation of  
464 filament-forming CCRPs in prokaryotes for this task is conceivable. Bactofilins constitute a  
465 separate class of prokaryotic-specific polymerizing proteins and were proposed to be involved  
466 in coordinated motility in *C. crescentus* (Kühn *et al.*, 2010). Additionally, the filament-forming  
467 CCRP AglZ from *Myxococcus xanthus* was previously shown to govern gliding motility together  
468 with a multi-protein complex that also involves the MreB cytoskeleton (Yang *et al.*, 2004; Nan  
469 *et al.*, 2010). The interaction of Slr1301 with twitching motility proteins was prevailed in the  
470 non-motile *Synechocystis* strain, hinting for additional beneficial functions of this interaction  
471 besides motility. Notably, we previously reported filament-forming properties for Alr0931  
472 (CypS), which is a homolog of Slr1301 in *Anabaena* (Springstein *et al.*, 2019). While CypS  
473 polymerizes into filaments *in vitro*, Slr1301 does not, which could indicate a specific adaptation  
474 of CypS to filament-formation in multicellular cyanobacteria. Despite their different cellular  
475 functions and *in vitro* polymerization properties, the homologous proteins Slr1301, Syc1139  
476 and CypS retained the ability to cross-interact (Supplementary Fig. 3A). Further studies may  
477 focus on identifying the protein domains that mediate this interaction, likely residing within the  
478 highly conserved amino acid sequence region in this homologous protein family

479 (Supplementary Fig. 3B). These regions are likely important for an interaction with species-  
480 specific proteins that lead to their species-specific cellular function.

481 TPR proteins are known to mediate protein-protein interactions and can assemble into  
482 multimers, but their ability to polymerize into filaments has not been described so far (Blatch  
483 and Lässle, 1999). Nonetheless, All4981 polymerizes *in vitro* and *in vivo* in all tested hosts.  
484 Additionally, it forms extracellular filaments and is presumably an essential protein in  
485 *Anabaena*. These observations suggest that All4981 is a *bona fide* prokaryotic filament-  
486 forming TPR protein. The association of All4981 with MreB, FtsZ-regulators, the S-layer and  
487 SepJ indicates that it might function as a bridge that connects the shape-determinants outside  
488 of the cell wall and inside of the cytoplasmic membrane to the sites of cell-cell connections (i.e.  
489 septal junctions). A function of All4981 in *Anabaena* cell and filament shape is also supported  
490 by its interaction with the *Anabaena* filament and cell shape stabilizing proteins LfiA and LfiB  
491 (Springstein *et al.*, 2019).

492 Considering the presence of an N-terminal transmembrane domain and the lack of  
493 clear *in vitro* filaments, it is unlikely that Syc2039 constitutes a genuine filament-forming  
494 protein. Nonetheless, the highly abundant filamentous network formed in all tested bacterial  
495 hosts suggests that Syc2039 is associated with cytoskeletal structures. Specifically, the  
496 elongated phenotype and the disturbed cytokinesis in the *Synechococcus*  $\Delta$ syc2039 mutant  
497 and the non-segregated  $\Delta$ syc1139 mutant suggest an association with the FtsZ-driven  
498 elongasome. Direct interaction with FtsZ or MreB could not be shown, as such, future studies  
499 will likely attempt to unravel the presumed connection of the *Synechococcus* CCRPs to those  
500 two major cytoskeletal systems. Notably, besides its cytokinetic defect, the  $\Delta$ syc2039 mutant  
501 showed growth characteristics like the WT, suggesting that feedback mechanisms between  
502 cytokinesis and cell division are disturbed in the  $\Delta$ syc2039 mutant.

503 Our results reveal two novel filament-forming CCRPs - Fm7001 and All4981 - from  
504 different cyanobacterial subsections and morphotypes (Fig. 7). Our study thus extends the  
505 spectrum of known filament-forming CCRPs in prokaryotes and expands the set of functional

506 properties associated with IF-like proteins in prokaryotes. Notably, as indicated by Bagchi *et*  
507 *al.* (2008), we demonstrate that the sole observation of coiled-coil-rich regions within a protein  
508 sequence cannot be regarded as a sole predictor of protein polymerization, hence identification  
509 of novel filament-forming proteins requires additional *in vitro* and *in vivo* assays. The  
510 cyanobacterial CCRPs we report here, like other bacterial CCRPs (Ausmees, Kuhn and  
511 Jacobs-Wagner, 2003; Bagchi *et al.*, 2008; Waidner *et al.*, 2009; Fiuza *et al.*, 2010; Specht *et*  
512 *al.*, 2011; Holmes *et al.*, 2013) and eukaryotic IFs (Alberts *et al.*, 2014) are essential cellular  
513 components (All4981), are important for cell shape determination (Fm7001, Syc1139 and  
514 Syc2039), mediate cellular motility (Slr7083 and Slr1301), DNA segregation (Syc1139 and  
515 Syc2039) and colony integrity (Syc1139). Our study thus strengthens the perception that like  
516 eukaryotes, prokaryotes require organized internal complexes and even microcompartments  
517 to maintain cell shape, size and proper cell function and highlights the usefulness of  
518 polymerized proteinaceous structures for cellular processes. Remarkably, some of the  
519 identified CCRPs were highly conserved among all cyanobacterial morphotypes, suggesting  
520 that their function is conserved. Future studies are required in order to evaluate the functional  
521 conservation of homologous proteins in different cyanobacterial species and morphotypes. On  
522 the other hand, Syc2039 and Slr7083 are highly strain specific, possibly performing a function  
523 that is adapted to the very needs of their hosts. Similarly to the eukaryotic cytolinker proteins  
524 (Leung, Green and Liem, 2002; Wiche, Osmanagic-Myers and Castañón, 2015),  
525 cyanobacterial CCRPs were often associated with other cytoskeletal systems (MreB, FtsZ and  
526 other filament-forming CCRPs) and sites of cell-cell connections (i.e. SepJ), which  
527 demonstrates the necessity for those structures to be in a constant interplay even in  
528 comparably small cells. The discovery of filament-forming CCRPs with different levels of  
529 conservation in various cyanobacterial morphotypes thus opens up new avenues of research  
530 on their contribution to cyanobacterial morphological diversity.

## 531 **Material and Methods**

### 532 Data and CCRP prediction

533 The cyanobacteria protein families were constructed from completely sequenced genomes  
534 available in RefSeq database (O'Leary *et al.*, 2015) (ver. May 2016; Supplementary File 2).  
535 For the construction of protein families, at the first stage, all protein sequences annotated in  
536 the genomes were blasted all-against-all using stand-alone BLAST (Altschul *et al.*, 1990)  
537 (V. 2.2.26). Protein sequence pairs that were found as reciprocal best BLAST hits (rBBHs;  
538 Tatusov, Koonin and Lipman, 1997) with a threshold of E-value  $\leq 1 \times 10^{-5}$  were further compared  
539 by global alignment using needle (EMBOSS package, V. 6.6.0.0; (Rice, Longden and Bleasby,  
540 2000). Sequence pairs having  $\geq 30\%$  identical amino acids were clustered into protein families  
541 using the Markov clustering algorithm (MCL) (Enright, Van Dongen and Ouzounis, 2002) (ver.  
542 12-135) with the default parameters. For the CCRPs prediction, 1,535 protein sequences  
543 containing non-standard amino acids were discarded. Coiled-coil regions in protein sequences  
544 were predicted using PEPCOIL (EMBOSS package, V. 6.6.0.0; (Rice, Longden and Bleasby,  
545 2000). The algorithm was executed with a window size of 21 and the threshold for amino acids  
546 in coiled-coil conformation was set to  $\geq 80$  amino acid residues similarly as described by Bagchi  
547 *et al.* (2008). Statistical tests were performed with MatLab©. For the comparison of CCRPs  
548 proportion, the compared groups included: 1) SynProCya group, 2) unicellular cyanobacteria,  
549 3) unicellular cyanobacteria that divide in more than one plane, and 4) multicellular  
550 cyanobacteria. Identification of conserved amino acid domains within cyanobacterial CCRP  
551 homologs (CypS (Alr0931), Slr1301 and Syc1139) was done using MULTALIGN (Corpet,  
552 1988).

553 Protein candidates were further manually examined with online available bioinformatic  
554 tools (NCBI Conserved Domain (CD) Search (Marchler-Bauer *et al.*, 2016), TMHMM Server  
555 (Krogh *et al.*, 2001) (V. 2.0), PSIPRED (McGuffin, Bryson and Jones, 2000), PSORTb (Yu *et*  
556 *al.*, 2010) (ver. 3.0), I-TASSER (Zhang, 2009). CCRPs exhibiting similar predictions to known

557 IF and IF-like proteins like CreS, FILP, vimentin, desmin or keratin were selected, and proteins  
558 predicted to be involved in other cellular processes were excluded.

559 Bacterial strains and growth conditions

560 *Fischerella*, *Anabaena* and *Synechocystis* were obtained from the Pasteur Culture Collection  
561 (PCC) of cyanobacteria (France). *Synechococcus* was a gift from Martin Hagemann  
562 (University Rostock). Glucose-tolerant motile *Synechocystis* PCC-M substrain was a gift from  
563 Annegret Wilde (University Freiburg). Cells were grown photoautotrophically in BG11 or without  
564 combined nitrogen (BG11<sub>0</sub>) at a 16h/8h light/dark regime (*Fischerella*) or at constant light  
565 (*Anabaena*, *Synechococcus* and *Synechocystis*) with a light intensity of 20  $\mu\text{mol m}^{-2} \text{s}^{-1}$ . When  
566 appropriate, 50  $\mu\text{g ml}^{-1}$  kanamycin (Km), 2.5  $\mu\text{g ml}^{-1}$  spectinomycin (Sp), 2.5  $\mu\text{g ml}^{-1}$   
567 streptomycin (Sm) or 30  $\mu\text{g ml}^{-1}$  neomycin (Nm) was added. Non-segregated  $\Delta\text{sync1139}$  cells  
568 were always grown in the presence of Km. *E. coli* strains DH5 $\alpha$ , DH5 $\alpha$ MCR, XL1-blue and  
569 HB101 were used for cloning and conjugation by triparental mating. BTH101 was used for  
570 BACTH assays and BL21 (DE3) was used for expression of His- and GFP-tagged proteins in  
571 *E. coli*. All *E. coli* strains (Supplementary Table 2) were grown in LB medium containing the  
572 appropriate antibiotics at standard concentrations.

573 Plasmid and strain construction

574 All plasmids employed in this study were either generated by using standard restriction  
575 enzyme-base cloning procedures or using Gibson assembly (Gibson *et al.*, 2009). A detailed  
576 description of the cloning strategies for the respective plasmids is available upon request from  
577 the authors. All primers, plasmids and strains employed or generated in this study are listed in  
578 Supplementary Tables 2-5. GFP, YFP and eCFP protein tags were used as reporter proteins  
579 and His<sub>6</sub> tag was used for protein affinity purification. For gene replacement mutants,  
580 homologous flanks for double homologous recombination comprised 1000 bp upstream and  
581 downstream of the gene of interest. Mutant strains harboring gene replacements with antibiotic  
582 resistance cassettes (*nptII* or *CS.3*; Beck *et al.*, 1982; Sandvang, 1999) were verified by colony

583 PCR testing for absence of gene of interest using primers #129/#130 for  $\Delta slr7083$ , primers  
584 #168/#169 for  $\Delta slr1301$ , primers #146/#147 for  $\Delta sync2039$  or primers #161/#162 for  $\Delta sync1139$ .  
585 We also attempted to generate gene replacement mutants for *all4981* and *fm7001* but  
586 remained unsuccessful.

#### 587 Transformation of cyanobacteria

588 Transformation of *Synechococcus* was achieved by natural transformation as described by  
589 Ivleva *et al.* (2005) and transformation of *Synechocystis* was accomplished by natural  
590 transformation as described by Vermaas *et al.* (2002) or by conjugation as described by  
591 Ungerer and Pakrasi (2016). *Anabaena* and *Fischerella* were transformed by conjugation as  
592 described by Ungerer and Pakrasi (2016) or Stucken *et al.* (2012), respectively. Ex-conjugant  
593 colonies from *Synechococcus* and *Synechocystis* carrying gene replacements were re-  
594 streaked three to four times and absence of genes of interest was verified by colony PCR.  
595 Transformation of sonicated (fragmented) and NaCl-treated *Fischerella* cells followed by the  
596 conjugational method described by Ungerer and Pakrasi (2016) was also feasible for  
597 *Fischerella*, albeit with a lower transformation frequency.

#### 598 Phenotypic characterization of the mutant strains

599 Defects in cell viability were evaluated by spot assays adapted from Dörrich *et al.* (2014). Wild  
600 type and mutant strains from liquid cultures or BG11 plates were adjusted to an OD<sub>750</sub> of about  
601 0.4 in liquid BG11 liquid. Next, 5  $\mu$ l of cells were spotted in triplicates onto BG11 plates or  
602 BG11 plates supplemented with Proteinase K or lysozyme at indicated concentrations in 10-  
603 fold serial dilutions and incubated under standard growth conditions until no further colonies  
604 arose in the highest dilution.

605 Growth defects were assessed with growth curves. For this, cells were grown in liquid  
606 BG11 medium, washed three times by centrifugation (6500 x g, RT, 3 min) in BG11, adjusted  
607 to an OD<sub>750</sub> of 0.1 and then grown in triplicates or quadruples at standard growth conditions in  
608 15 ml culture volumes. OD<sub>750</sub> values were recorded every 24 h.

609 Cell length of *Synechococcus* WT, mutant strains and mutant complementation strains  
610 was measured using the line tool from the imaging software Fiji.

611 Cell wall integrity defects were evaluated by testing the influence of osmotic factors on  
612 cell growth. *Synechococcus* WT and mutant strains were grown on BG11 agar plates,  
613 transferred to BG11 liquid medium and grown under standard growth conditions with or without  
614 5 mM glucose, 200 mM glucose, 2 mM NH<sub>4</sub>Cl, 200 mM maltose or 500 mM NaCl.

615 To evaluate the motility of *Synechocystis* and PCC-M WT and mutant strains, three  
616 single colonies of the respective strain were streaked on a line on a BG11 growth plate. Growth  
617 plates were then placed into the standard culture incubator for 10 d with with illumination limited  
618 from one direction.

619 Protein purification and *in vitro* filamentation assays

620 C-terminally His<sub>6</sub>-tagged proteins were expressed and subsequently purified under denaturing  
621 conditions using Ni-NTA affinity columns as previously described by Springstein *et al.* (2019).  
622 For expression of MBP-Fm7001-His<sub>6</sub>, DH5 $\alpha$  cells carrying pMAL-c2x-Fm7001-His<sub>6</sub> were  
623 grown and induced accordingly but in the presence of 0.2% glucose. Purified proteins were  
624 dialyzed overnight against polymerization buffer (PLB: 50 mM PIPES, 100 mM KCl, pH 7.0;  
625 HLB: 25 mM HEPES, 150 mM NaCl, pH 7.4) at 18 °C and 180 rpm with three bath changes  
626 using a Slide-A-Lyzer™ MINI Dialysis Device (10K MWCO, 0.5 ml or 2 ml; Thermo Fischer  
627 Scientific). Purified proteins were stained with 0.005 mg NHS-Fluorescein (Thermo Fischer  
628 Scientific) per 1 ml protein dialysate and *in vitro* filamentation was analyzed by epifluorescence  
629 microscopy.

630 For Fm7001-His<sub>6</sub>, proteins were slowly dialyzed against 2 mM Tris-HCl, 4.5 M urea, pH  
631 7.5 (18°C, 200 rpm) decreasing 0.5 M urea every 2 h (from 6 M to 4.5 M urea). The resulting  
632 floating filamentous web was then analyzed by bright field microscopy.

633 Syc2039-His<sub>6</sub> failed to be expressed in *E. coli* BL21 (DE3). To bypass this, Syc2039-  
634 GFP-His, under the control of an IPTG-inducible P<sub>trc</sub>, was inserted into a neutral locus of



635 *Synechococcus*. Cells were grown to an OD<sub>750</sub> of 0.8 and protein expression was induced with  
636 0.05 mM IPTG for 3 d. Induced cells were harvested and washed with PBS by centrifugation  
637 (4800 x g, 4 °C, 10 min) and stored at -80 °C. Protein purification, dialysis and labeling was  
638 then performed as described above with the exception that BG11 growth medium was used  
639 as dialysate.

#### 640 Co-immunoprecipitation

641 For co-immunoprecipitations of fluorescently tagged CCRP candidates, cyanobacterial strains  
642 expressing YFP-All4981 or Slr1301-YFP were grown in BG11 or BG11<sub>0</sub> liquid medium. Co-  
643 immunoprecipitation was performed using the  $\mu$ MACS GFP isolation kit (Miltenyl Biotec) as  
644 previously described by Springstein *et al.* (2019) using PBS-N (PBS supplemented with 1%  
645 NP-40) or HSLB (50 mM NaH<sub>2</sub>PO<sub>4</sub>, 500 mM NaCl, 1% NP-40, pH 7.4) lysis buffers  
646 supplemented with a protease inhibitor cocktail (cOmplete™, EDTA-free Protease Inhibitor  
647 Cocktail, Sigma-Aldrich). Proteins were identified by mass spectrometry as previously  
648 described by Springstein *et al.* (2019) for YFP-All4981 or by Kahnt *et al.* (2007) for Slr1301-  
649 YFP.

#### 650 Immunofluorescence

651 The localization of FtsZ in *Synechococcus* WT and mutant strains was evaluated by  
652 immunofluorescence using a modified protocol from Heinz *et al.* (2016). In contrast, cells were  
653 lysed in 50 mM Tris-HCl pH 7.4, 10 mM EDTA and 0.2 mg ml<sup>-1</sup> lysozyme for 30 min at 37 °C  
654 and samples were blocked in 1x Roti®-ImmunoBlock (Carl Roth) in PBS supplemented with  
655 0.05% Tween 20. Samples were incubated with rabbit anti-FtsZ primary antibody (Agrisera;  
656 raised against *Anabaena* FtsZ; 1:250 diluted) in blocking buffer followed by incubation with 7.5  
657  $\mu$ g ml<sup>-1</sup> Alexa Fluor 488-conjugated goat anti-rabbit IgG (H+L) secondary antibody (Thermo  
658 Fischer Scientific) in blocking buffer. Before microscopy, cells were stained with 10  $\mu$ g ml<sup>-1</sup>  
659 DAPI (final concentration) in PBS.

660 Brightfield and fluorescence microscopy analysis

661 Bacterial strains grown in liquid culture were either directly applied to a microscope slide or  
662 previously immobilized on a 2% low-melting agarose in PBS agarose pad and air dried before  
663 microscopic analysis. Epifluorescence microscopy was performed using an Axio Imager.M2  
664 light microscope (Carl Zeiss) equipped with Plan-Apochromat 63x/1.40 Oil M27 objective and  
665 the AxioCam MR R3 imaging device (Carl Zeiss). GFP, Alexa Fluor 488, eCFP and YFP  
666 fluorescence was visualized using filter set 38 (Carl Zeiss; excitation: 470/40 nm band pass  
667 (BP) filter; emission: 525/50 nm BP). Chlorophyll auto-fluorescence was recorded using filter  
668 set 15 (Carl Zeiss; excitation: 546/12 nm BP; emission: 590 nm long pass). When applicable,  
669 cells were previously incubated in the dark at RT for about 5 min with 10  $\mu\text{g ml}^{-1}$  DAPI in PBS  
670 to stain intracellular DNA. For visualization of DAPI fluorescence filter set 49 (Carl Zeiss;  
671 excitation: G 365 nm; emission: 455/50 nm) was employed. *E. coli* BL21 (DE3) cells expressing  
672 C-terminally GFP-tagged protein candidates were grown over night in LB and then diluted 1:40  
673 in the same medium the following day. Cells were grown for 2 h at 37 °C, briefly acclimated to  
674 20 °C for 10 min and induced with 0.05 mM IPTG at 20 °C. Protein localization of GFP/YFP-  
675 tagged proteins was then observed after indicated time points of cells immobilized on an  
676 agarose pad.

677 Statistical analysis

678 Beta-galactosidase values were measured in triplicates from three independent colonies and  
679 significant differences compared to WT were determined by a one-way ANOVA using  
680 Dunnett's multiple comparison test. For statistical evaluation of *Synechococcus* WT and  
681 mutant cell length, a one-way ANOVA using Turkey's multiple comparison test was used.  
682 Significance levels are the same as for the beta-galactosidase assay. Statistical tests were  
683 performed with the GraphPad Prims 8.0.0 software. Significance levels are indicated by stars  
684 (\*) and correspond to: \*:  $P < 0.05$ , \*\*:  $P < 0.01$ , \*\*\*:  $P < 0.001$ , \*\*\*\*:  $P < 0.0001$ .

685 RNA isolation and RT-PCR

686 Total RNA was isolated from 10 ml culture using either the Direct-zol™ RNA MiniPrep Kit  
687 (Zymo Research; *Synechocystis*, *Synechococcus* and *Anabaena*) according to the  
688 manufacturer's instructions or the Plant RNA Reagent (Thermo Fischer Scientific; *Anabaena*,  
689 *Fischerella* and *Synechocystis*). For RNA isolation using the Plant RNA Reagent, a modified  
690 protocol was employed. To this end, cells were pelleted by centrifugation (4800 x g, 10 min, 4  
691 °C) and the supernatant was discarded. The pellet was resuspended in 0.5 ml of Plant RNA  
692 Reagent und lysed in a Precellys® 24 homogenizer (Bertin) with 3 strokes at 6500 rpm for 30  
693 s in 2 ml soil grinding (SK38) or tough microorganism (VK05) lysis tubes (Bertin). RNA was  
694 then isolated according to the manufacturer's instructions. Isolated RNA was treated with DNA-  
695 free™ Kit (2 units rDNAs/reaction; Thermo Fischer Scientific) and 1 µg (*Fischerella*,  
696 *Synechocystis* and *Synechococcus*) or 200 ng (*Anabaena*) RNA was reverse transcribed using  
697 the Maxima™ H Minus cDNA Synthesis Master Mix (with dsDNase; Thermo Fischer Scientific,  
698 for *Fischerella*, *Synechocystis* and *Synechococcus*) or the qScript™ cDNA Synthesis Kit  
699 (Quanta Biosciences, for *Anabaena*). RT-PCR of cDNA samples for *fm7001*, *ftsZ*, *slr7083*,  
700 *rnpB*, *slr1301*, *syc2039*, *syc1139*, *all4981*, *all4981+all4982* and *all4981+all4983* was done  
701 using primer pairs #1/#2, #3/#4, #5/#6, #7/#8, #9/#10, #11/#12, #13/#14, #15/#16, #17/#15  
702 and #18/#15, respectively.

703 Bacterial two hybrid assays

704 In this study, the BACTH system (Euromedex) was employed. Gene candidates were cloned  
705 into the expression vectors pKNT25, pKT25, pUT18 and pUT18C by GIBSON assembly,  
706 thereby generating C and N-terminal translational fusions to the T25 or T18 subunit.  
707 Chemically competent *E. coli* BTH101 ( $\Delta$ *cya*) cells were co-transformed with 5 ng of the  
708 indicated plasmids, plated onto LB plates supplemented with 200 µg ml<sup>-1</sup> X-gal, 0.5 mM IPTG,  
709 Amp, Km and grown at 30 °C for 24-36 h. Interactions were quantified by beta-galactosidase  
710 assays from three colonies for each combination according to the protocol described by  
711 Euromedex or in a 96 well format according to Karimova, Davi and Ladant (2012). For this aim,

712 cultures were either grown over night at 30 °C or for 2 d at 20 °C in LB Amp, Km, 0.5 mM IPTG  
713 and interaction strength of the investigated proteins was by quantified by beta-galactosidase-  
714 mediated hydrolyzation of ONPG (ortho-Nitrophenyl- $\beta$ -galactoside), which is then recorded in  
715 Miller units (Miller, 1992).

716

## 717 **Acknowledgements**

718 We thank Katrin Schumann, Myriam Barz, Lisa Stuckenschneider, Lisa-Marie Philipp and  
719 Marius Lasse Theune for their assistance in the experimental work. Furthermore, we thank  
720 Martin Thanbichler and Daniela Kiekebusch (both from Philipps University, Marburg, Germany)  
721 for their support with mass spectrometry analysis. The study was supported by the German  
722 science foundation (DFG) (Grant No. STU513/2-1 awarded to KS).

## 723 **Author contribution**

724 BLS and KS designed the study. BLS established and performed the experimental work with  
725 contributions from JW. CW and TD performed the comparative genomics analysis. AOH  
726 analyzed protein samples by mass spectrometry. BLS, TD and KS drafted the manuscript with  
727 contributions from all coauthors.

728 **References**

- 729 Alberts, B. *et al.* (2014) *Molecular Biology of the Cell*. 6th editio. Garland Science.
- 730 Altschul, S. F. *et al.* (1990) 'Basic local alignment search tool', *Journal of Molecular Biology*.
- 731 Academic Press, 215(3), pp. 403–410. doi: 10.1016/S0022-2836(05)80360-2.
- 732 Ausmees, N., Kuhn, J. R. and Jacobs-Wagner, C. (2003) 'The bacterial cytoskeleton: An
- 733 intermediate filament-like function in cell shape', *Cell*, pp. 705–713. doi: 10.1016/S0092-
- 734 8674(03)00935-8.
- 735 Bagchi, S. *et al.* (2008) 'Intermediate filament-like proteins in bacteria and a cytoskeletal
- 736 function in *Streptomyces*', *Molecular Microbiology*, 70(4), pp. 1037–1050. doi: 10.1111/j.1365-
- 737 2958.2008.06473.x.
- 738 Beck, E. *et al.* (1982) 'Nucleotide sequence and exact localization of the neomycin
- 739 phosphotransferase gene from transposon Tn5', *Gene*, 19(3), pp. 327–336. doi:
- 740 10.1016/0378-1119(82)90023-3.
- 741 Bharat, T. A. M. *et al.* (2015) 'Structures of actin-like ParM filaments show architecture of
- 742 plasmid-segregating spindles', *Nature*. Nature Publishing Group, a division of Macmillan
- 743 Publishers Limited. All Rights Reserved., 523, p. 106. Available at:
- 744 <https://doi.org/10.1038/nature14356>.
- 745 Bhaya, D. *et al.* (2001) 'Novel Motility Mutants of *Synechocystis* Strain PCC 6803 Generated
- 746 by In Vitro Transposon Mutagenesis Novel Motility Mutants of *Synechocystis* Strain PCC 6803
- 747 Generated by In Vitro Transposon Mutagenesis †', *Journal of Bacteriology*, 183(20), pp. 1–5.
- 748 doi: 10.1128/JB.183.20.6140.
- 749 Bi, E. and Lutkenhaus, J. (1991) 'FtsZ ring structure associated with division in *Escherichia*
- 750 *coli*', *Nature*, 354(6349), pp. 161–164. doi: 10.1038/354161a0.
- 751 Blatch, G. L. and Lässle, M. (1999) 'The tetratricopeptide repeat: A structural motif mediating
- 752 protein-protein interactions', *BioEssays*, 21(11), pp. 932–939. doi: 10.1002/(SICI)1521-

- 753 1878(199911)21:11<932::AID-BIES5>3.0.CO;2-N.
- 754 Bocharova, O. V. *et al.* (2005) 'In vitro conversion of full-length mammalian prion protein  
755 produces amyloid form with physical properties of PrPSc', *Journal of Molecular Biology*,  
756 346(2), pp. 645–659. doi: 10.1016/j.jmb.2004.11.068.
- 757 Boyer, H. and Roulland-Dessoix, D. (1969) 'A complementation analysis of the restriction and  
758 modification of DNA in Escherichia coli.', *J. Mol. Biol.*, 41, pp. 459–472.
- 759 Buikema, W. J. and Haselkorn, R. (2001) 'Expression of the Anabaena hetR gene from a  
760 copper-regulated promoter leads to heterocyst differentiation under repressing conditions',  
761 *Proceedings of the National Academy of Sciences*, 98(5), pp. 2729–2734. doi:  
762 10.1073/pnas.051624898.
- 763 Bustos, S. A. and Golden, S. S. (1992) 'Light-regulated expression of the psbD gene family in  
764 Synechococcus sp. strain PCC 7942: evidence for the role of duplicated psbD genes in  
765 cyanobacteria', *Molecular and General Genetics MGG*, 232(2), pp. 221–230. doi:  
766 10.1007/BF00280000.
- 767 Cabeen, M. T. *et al.* (2009) 'Bacterial cell curvature through mechanical control of cell growth',  
768 *The EMBO Journal*, pp. 1208–1219. doi: 10.1038/emboj.2009.61.
- 769 Cai, Y. and Wolk, C. P. (1990) 'Use of a conditionally lethal gene in Anabaena sp. strain PCC  
770 7120 to select for double recombinants and to entrap insertion sequences', *Journal of*  
771 *Bacteriology*, 172(6), pp. 3138–3145.
- 772 Camberg, J. L., Hoskins, J. R. and Wickner, S. (2009) 'ClpXP protease degrades the  
773 cytoskeletal protein, FtsZ, and modulates FtsZ polymer dynamics', *Proc Natl Acad Sci U S A*,  
774 106(26), pp. 10614–10619. doi: 10.1073/pnas.0904886106.
- 775 Cappuccinelli, P. (1980) 'The movement of eukaryotic cells', in *Motility of Living Cells*.  
776 Dordrecht: Springer Netherlands, pp. 59–74. doi: 10.1007/978-94-009-5812-8\_4.
- 777 Carballido-Lopez, R. (2006) 'The Bacterial Actin-Like Cytoskeleton', *Microbiology and*  
30

- 778 *Molecular Biology Reviews*, 70(4), pp. 888–909. doi: 10.1128/MMBR.00014-06.
- 779 Charbon, G., Cabeen, M. T. and Jacobs-Wagner, C. (2009) 'Bacterial intermediate filaments:  
780 In vivo assembly, organization, and dynamics of crescentin', *Genes and Development*, pp.  
781 1131–1144. doi: 10.1101/gad.1795509.
- 782 Corpet, F. (1988) 'Multiple sequence alignment with hierarchical clustering.', *Nucleic acids  
783 research*, 16(22), pp. 10881–90. doi: 10.1093/nar/16.22.10881.
- 784 Dörrich, A. K. *et al.* (2014) 'Deletion of the *Synechocystis* sp. PCC 6803 *kaiAB1C1* gene cluster  
785 causes impaired cell growth under light???dark conditions', *Microbiology (United Kingdom)*,  
786 160(2014), pp. 2538–2550. doi: 10.1099/mic.0.081695-0.
- 787 England, P. *et al.* (2005) 'The Scc Spirochetal Coiled-Coil Protein Forms Helix-Like Filaments  
788 and Binds to Nucleic Acids Generating Nucleoprotein Structures', *Journal of Bacteriology*,  
789 188(2), pp. 469–476. doi: 10.1128/jb.188.2.469-476.2006.
- 790 Enright, A. J., Van Dongen, S. and Ouzounis, C. A. (2002) 'An efficient algorithm for large-  
791 scale detection of protein families', *Nucleic acids research*. Oxford University Press, 30(7), pp.  
792 1575–1584.
- 793 Fiuza, M. *et al.* (2010) 'Phosphorylation of a novel cytoskeletal protein (RsmP) regulates rod-  
794 shaped morphology in *Corynebacterium glutamicum*', *Journal of Biological Chemistry*, pp.  
795 29387–29397. doi: 10.1074/jbc.M110.154427.
- 796 Flärdh, K. *et al.* (2012) 'Regulation of apical growth and hyphal branching in *Streptomyces*',  
797 *Current Opinion in Microbiology*, 15(6), pp. 737–743. doi:  
798 <https://doi.org/10.1016/j.mib.2012.10.012>.
- 799 Flores, E. *et al.* (2007) 'Septum-localized protein required for filament integrity and diazotrophy  
800 in the heterocyst-forming cyanobacterium *Anabaena* sp. strain PCC 7120', *Journal of  
801 Bacteriology*, 189(10), pp. 3884–3890. doi: 10.1128/JB.00085-07.
- 802 Fuchino, K. *et al.* (2013) 'Dynamic gradients of an intermediate filament-like cytoskeleton are

- 803 recruited by a polarity landmark during apical growth', *Proceedings of the National Academy*  
804 *of Sciences*, pp. E1889–E1897. doi: 10.1073/pnas.1305358110.
- 805 Fuchs, E. and Weber, K. (1994) 'INTERMEDIATE FILAMENTS: Structure, Dynamics, Function  
806 and Disease', *Annual Review of Biochemistry*, 63, pp. 345–382.
- 807 Geisler, N. and Weber, K. (1982) 'The amino acid sequence of chicken muscle desmin  
808 provides a common structural model for intermediate filament proteins', *The EMBO journal*,  
809 1(12), pp. 1649–1656. Available at: <https://www.ncbi.nlm.nih.gov/pubmed/6202512>.
- 810 Gibson, D. G. *et al.* (2009) 'Enzymatic assembly of DNA molecules up to several hundred  
811 kilobases', *Nature Methods*, 6(5), pp. 343–345. doi: 10.1038/nmeth.1318.
- 812 Grant, S. G. *et al.* (1990) 'Differential plasmid rescue from transgenic mouse DNAs into  
813 *Escherichia coli* methylation-restriction mutants.', *Proceedings of the National Academy of*  
814 *Sciences*, 87(12), pp. 4645–4649. doi: 10.1073/pnas.87.12.4645.
- 815 Heinz, S. *et al.* (2016) 'Thylakoid Membrane Architecture in *Synechocystis* Depends on CurT,  
816 a Homolog of the Granal CURVATURE THYLAKOID1 Proteins', *The Plant Cell*, 28(9), pp.  
817 2238–2260. doi: 10.1105/tpc.16.00491.
- 818 Hempel, A. M. *et al.* (2012) 'The Ser/Thr protein kinase AfsK regulates polar growth and hyphal  
819 branching in the filamentous bacteria *Streptomyces*', *Proceedings of the National Academy of*  
820 *Sciences of the United States of America*. 2012/08/06. National Academy of Sciences,  
821 109(35), pp. E2371–E2379. doi: 10.1073/pnas.1207409109.
- 822 Herrero, A., Stavans, J. and Flores, E. (2016) 'The multicellular nature of filamentous  
823 heterocyst-forming cyanobacteria', *FEMS Microbiology Reviews*, 40(6), pp. 831–854. doi:  
824 10.1093/femsre/fuw029.
- 825 Herrmann, H. *et al.* (1996) 'Structure and assembly properties of the intermediate filament  
826 protein vimentin: The role of its head, rod and tail domains', *Journal of Molecular Biology*,  
827 264(5), pp. 933–953. doi: 10.1006/jmbi.1996.0688.



- 828 Herrmann, H. and Aebi, U. (2004) 'Intermediate Filaments: Molecular Structure, Assembly  
829 Mechanism, and Integration Into Functionally Distinct Intracellular Scaffolds', *Annual Review*  
830 *of Biochemistry*, 73(1), pp. 749–789. doi: 10.1146/annurev.biochem.73.011303.073823.
- 831 Holmes, N. A. *et al.* (2013) 'Coiled-coil protein Scy is a key component of a multiprotein  
832 assembly controlling polarized growth in *Streptomyces*', *Proceedings of the National Academy*  
833 *of Sciences*, pp. E397–E406. doi: 10.1073/pnas.1210657110.
- 834 Hu, B. *et al.* (2007) 'MreB is important for cell shape but not for chromosome segregation of  
835 the filamentous cyanobacterium *Anabaena* sp. PCC 7120', *Molecular Microbiology*, 63(6), pp.  
836 1640–1652. doi: 10.1111/j.1365-2958.2007.05618.x.
- 837 Huang, H.-H. *et al.* (2010) 'Design and characterization of molecular tools for a Synthetic  
838 Biology approach towards developing cyanobacterial biotechnology', *Nucleic acids research*.  
839 2010/03/17. Oxford University Press, 38(8), pp. 2577–2593. doi: 10.1093/nar/gkq164.
- 840 Hurme, R. *et al.* (1994) 'Intermediate filament-like network formed in vitro by a bacterial coiled  
841 coil protein', *Journal of Biological Chemistry*, pp. 10675–10682.
- 842 Inclan, Y. F. *et al.* (2016) 'A scaffold protein connects type IV pili with the Chp chemosensory  
843 system to mediate activation of virulence signaling in *Pseudomonas aeruginosa*', *Molecular*  
844 *Microbiology*, 101(4), pp. 590–605. doi: 10.1111/mmi.13410.
- 845 Ingerson-Mahar, M. *et al.* (2010) 'The metabolic enzyme CTP synthase forms cytoskeletal  
846 filaments', *Nature Cell Biology*, pp. 739–746. doi: 10.1038/ncb2087.
- 847 Ingerson-Mahar, M. and Gitai, Z. (2012) 'A growing family: the expanding universe of the  
848 bacterial cytoskeleton', *FEMS Microbiol Rev*, 36(1), pp. 256–266. doi: 10.1111/j.1574-  
849 6976.2011.00316.x.
- 850 Ivleva, N. B. *et al.* (2005) 'LdpA: A component of the circadian clock senses redox state of the  
851 cell', *EMBO Journal*, 24(6), pp. 1202–1210. doi: 10.1038/sj.emboj.7600606.
- 852 Jain, I. H., Vijayan, V. and O'Shea, E. K. (2012) 'Spatial ordering of chromosomes enhances

- 853 the fidelity of chromosome partitioning in cyanobacteria.’, *Proceedings of the National*  
854 *Academy of Sciences of the United States of America*, 109(34), pp. 13638–43. doi:  
855 10.1073/pnas.1211144109.
- 856 Jones, L. J. F., Carballido-López, R. and Errington, J. (2001) ‘Control of cell shape in bacteria:  
857 Helical, actin-like filaments in *Bacillus subtilis*’, *Cell*, 104(6), pp. 913–922. doi: 10.1016/S0092-  
858 8674(01)00287-2.
- 859 Kahnt, J. *et al.* (2007) ‘Post-translational modifications in the active site region of methyl-  
860 coenzyme M reductase from methanogenic and methanotrophic archaea’, *The FEBS journal*.  
861 Wiley Online Library, 274(18), pp. 4913–4921.
- 862 Karimova, G., Davi, M. and Ladant, D. (2012) ‘The  $\beta$ -lactam resistance protein Blr, a small  
863 membrane polypeptide, is a component of the *Escherichia coli* cell division machinery’, *Journal*  
864 *of Bacteriology*, 194(20), pp. 5576–5588. doi: 10.1128/JB.00774-12.
- 865 Kelemen, G. H. (2017) ‘Intermediate Filaments Supporting Cell Shape and Growth in Bacteria  
866 BT - Prokaryotic Cytoskeletons: Filamentous Protein Polymers Active in the Cytoplasm of  
867 Bacterial and Archaeal Cells’, in Löwe, J. and Amos, L. A. (eds). Cham: Springer International  
868 Publishing, pp. 161–211. doi: 10.1007/978-3-319-53047-5\_6.
- 869 Koch, M. K., McHugh, C. A. and Hoiczyk, E. (2011) ‘BacM, an N-terminally processed bactofilin  
870 of *Myxococcus xanthus*, is crucial for proper cell shape’, *Mol Microbiol.*, 80(4), pp. 1031–1051.  
871 doi: 10.1111/j.1365-2958.2011.07629.x.
- 872 Kopfmann, S. and Hess, W. R. (2013) ‘Toxin-antitoxin systems on the large defense plasmid  
873 pSYSA of *synechocystis* sp. pCC 6803’, *Journal of Biological Chemistry*, 288(10), pp. 7399–  
874 7409. doi: 10.1074/jbc.M112.434100.
- 875 Köster, S. *et al.* (2015) ‘Intermediate filament mechanics in vitro and in the cell: From coiled  
876 coils to filaments, fibers and networks’, *Current Opinion in Cell Biology*, 32, pp. 82–91. doi:  
877 10.1016/j.ceb.2015.01.001.

- 878 Krogh, A. *et al.* (2001) 'Predicting transmembrane protein topology with a hidden Markov  
879 model: application to complete genomes', *Journal of molecular biology*. Elsevier, 305(3), pp.  
880 567–580.
- 881 Kruse, T., Bork-Jensen, J. and Gerdes, K. (2005) 'The morphogenetic MreBCD proteins of  
882 *Escherichia coli* form an essential membrane-bound complex', *Molecular Microbiology*, 55(1),  
883 pp. 78–89. doi: 10.1111/j.1365-2958.2004.04367.x.
- 884 Kühn, J. *et al.* (2010) 'Bactofilins, a ubiquitous class of cytoskeletal proteins mediating polar  
885 localization of a cell wall synthase in *Caulobacter crescentus*', *EMBO Journal*, pp. 327–339.  
886 doi: 10.1038/emboj.2009.358.
- 887 Kunert, A., Hagemann, M. and Erdmann, N. (2000) 'Construction of promoter probe vectors  
888 for *Synechocystis* sp. PCC 6803 using the light-emitting reporter systems Gfp and LuxAB',  
889 *Journal of Microbiological Methods*, 41(3), pp. 185–194. doi: 10.1016/S0167-7012(00)00162-  
890 7.
- 891 Larsen, R. A. *et al.* (2007) 'Treadmilling of a prokaryotic tubulin-like protein, TubZ, required for  
892 plasmid stability in *Bacillus thuringiensis*', *Genes and Development*, 21(11), pp. 1340–1352.  
893 doi: 10.1101/gad.1546107.
- 894 Leung, C. L., Green, K. J. and Liem, R. K. H. (2002) 'Plakins: A family of versatile cytolinker  
895 proteins', *Trends in Cell Biology*, 12(1), pp. 37–45. doi: 10.1016/S0962-8924(01)02180-8.
- 896 Lin, L. and Thanbichler, M. (2013) 'Nucleotide-independent cytoskeletal scaffolds in bacteria',  
897 *Cytoskeleton*, 70(8), pp. 409–423. doi: 10.1002/cm.21126.
- 898 Lodish, H. *et al.* (2000) *Molecular Cell Biology*. 4th edn. New York: W. H. Freeman. Available  
899 at: <https://www.ncbi.nlm.nih.gov/books/NBK21560/> (Accessed: 27 February 2018).
- 900 Lopes Pinto, F. *et al.* (2011) 'FtsZ degradation in the cyanobacterium *Anabaena* sp. strain PCC  
901 7120', *Journal of Plant Physiology*. Elsevier GmbH., 168(16), pp. 1934–1942. doi:  
902 10.1016/j.jplph.2011.05.023.

- 903 Löwe, J. and Amos, L. A. (2009) 'Evolution of cytomotive filaments: The cytoskeleton from  
904 prokaryotes to eukaryotes', *International Journal of Biochemistry and Cell Biology*, 41(2), pp.  
905 323–329. doi: 10.1016/j.biocel.2008.08.010.
- 906 Lupas, A., Van Dyke, M. and Stock, J. (1991) 'Predicting coiled coils from protein sequences',  
907 *Science*, pp. 1162–1164. doi: 10.1126/science.252.5009.1162.
- 908 Marchler-Bauer, A. *et al.* (2016) 'CDD/SPARCLE: functional classification of proteins via  
909 subfamily domain architectures', *Nucleic acids research*. Oxford University Press, 45(D1), pp.  
910 D200–D203.
- 911 McGuffin, L. J., Bryson, K. and Jones, D. T. (2000) 'The PSIPRED protein structure prediction  
912 server', *Bioinformatics*. Oxford University Press, 16(4), pp. 404–405.
- 913 Meselson, M. and Yuan, R. (1968) 'DNA restriction enzyme from *E. coli*.', *Nature*, 217(5134),  
914 pp. 1110–4. Available at: <http://www.ncbi.nlm.nih.gov/pubmed/4868368> (Accessed: 22  
915 February 2018).
- 916 Miller, J. H. (1992) *A Short Course in Bacterial Genetics – A Laboratory Manual and Handbook*  
917 *for Escherichia coli and Related Bacteria*, Cold Spring Harbor Laboratory Press. Cold Spring  
918 Harbor. doi: 10.1002/jobm.3620330412.
- 919 Nakamura, Y. *et al.* (1993) 'Acceleration of bovine neurofilament L assembly by deprivation of  
920 acidic tail domain', *European Journal of Biochemistry*, 212(2), pp. 565–571. doi:  
921 10.1111/j.1432-1033.1993.tb17694.x.
- 922 Nan, B. *et al.* (2010) 'A multi-protein complex from *Myxococcus xanthus* required for bacterial  
923 gliding motility', *Molecular Microbiology*, 76(6), pp. 1539–1554. doi: 10.1111/j.1365-  
924 2958.2010.07184.x.
- 925 Nayar, A. S. *et al.* (2007) 'FraG is necessary for filament integrity and heterocyst maturation in  
926 the cyanobacterium *Anabaena* sp. strain PCC 7120', *Microbiology*, 153(2), pp. 601–607. doi:  
927 10.1099/mic.0.2006/002535-0.

- 928 O’Leary, N. A. *et al.* (2015) ‘Reference sequence (RefSeq) database at NCBI: current status,  
929 taxonomic expansion, and functional annotation’, *Nucleic acids research*. Oxford University  
930 Press, 44(D1), pp. D733–D745.
- 931 Rackham, O. J. L. *et al.* (2010) ‘The Evolution and Structure Prediction of Coiled Coils across  
932 All Genomes’, *Journal of Molecular Biology*. Academic Press, 403(3), pp. 480–493. doi:  
933 10.1016/J.JMB.2010.08.032.
- 934 Ramos-León, F. *et al.* (2015) ‘Divisome-dependent subcellular localization of cell-cell joining  
935 protein SepJ in the filamentous cyanobacterium *Anabaena*’, *Molecular Microbiology*, 96(3), pp.  
936 566–580. doi: 10.1111/mmi.12956.
- 937 Rice, P., Longden, I. and Bleasby, A. (2000) ‘EMBOSS: the European Molecular Biology Open  
938 Software Suite.’, *Trends in genetics : TIG*. Elsevier, 16(6), pp. 276–7. doi: 10.1016/S0168-  
939 9525(00)02024-2.
- 940 Rippka, R. *et al.* (1979) ‘Generic Assignments, Strain Histories and Properties of Pure Cultures  
941 of Cyanobacteria’, *Microbiology*, 111(1), pp. 1–61. doi: 10.1099/00221287-111-1-1.
- 942 Sandvang, D. (1999) ‘Novel streptomycin and spectinomycin resistance gene as a gene  
943 cassette within a class 1 integron isolated from *Escherichia coli*’, *Antimicrobial Agents and*  
944 *Chemotherapy*, 43(12), pp. 3036–3038. doi: 10.1128/AAC.44.2.475-475.2000.
- 945 Schuergers, N. *et al.* (2015) ‘PilB localization correlates with the direction of twitching motility  
946 in the cyanobacterium *Synechocystis* sp. PCC 6803’, *Microbiology (Reading, England)*,  
947 161(2015), pp. 960–966. doi: 10.1099/mic.0.000064.
- 948 Schuergers, N., Mullineaux, C. W. and Wilde, A. (2017) ‘Cyanobacteria in motion’, *Current*  
949 *Opinion in Plant Biology*. Elsevier Ltd, 37, pp. 109–115. doi: 10.1016/j.pbi.2017.03.018.
- 950 Shoeman, R. L. and Traub, P. (1993) ‘Assembly of Intermediate Filaments’, *Bioessays*, 15(9),  
951 pp. 605–611. doi: 10.1002/bies.950150906.
- 952 Specht, M. *et al.* (2011) ‘*Helicobacter pylori* Possesses Four Coiled-Coil-Rich Proteins That

- 953 Form Extended Filamentous Structures and Control Cell Shape and Motility', *Journal of*  
954 *Bacteriology*, 193(17), pp. 4523–4530. doi: 10.1128/JB.00231-11.
- 955 Springstein, B. L. *et al.* (2019) 'A cytoskeletal network maintains filament shape in the  
956 multicellular cyanobacterium *Anabaena* sp. PCC 7120', *bioRxiv*, p. 553073. doi:  
957 10.1101/553073.
- 958 Stucken, K. *et al.* (2012) 'Transformation and conjugal transfer of foreign genes into the  
959 filamentous multicellular cyanobacteria (subsection V) *Fischerella* and *Chlorogloeopsis*',  
960 *Current Microbiology*, 65(5), pp. 552–560. doi: 10.1007/s00284-012-0193-5.
- 961 Stucken, K., Koch, R. and Dagan, T. (2013) 'Cyanobacterial defense mechanisms against  
962 foreign DNA transfer and their impact on genetic engineering', *Biological Research*, 46(4), pp.  
963 373–382. doi: 10.4067/S0716-97602013000400009.
- 964 Studier, F. W. and Moffatt, B. A. (1986) 'Use of bacteriophage T7 RNA polymerase to direct  
965 selective high-level expression of cloned genes', *Journal of Molecular Biology*, 189(1), pp.  
966 113–130. doi: 10.1016/0022-2836(86)90385-2.
- 967 Stuurman, N., Heins, S. and Aebi, U. (1998) 'Nuclear lamins: Their structure, assembly, and  
968 interactions', *Journal of Structural Biology*, 122(1–2), pp. 42–66. doi: 10.1006/jsbi.1998.3987.
- 969 Swulius, M. T. and Jensen, G. J. (2012) 'The helical mreB cytoskeleton in *Escherichia coli*  
970 MC1000/pLE7 is an artifact of the N-terminal yellow fluorescent protein tag', *Journal of*  
971 *Bacteriology*, 194(23), pp. 6382–6386. doi: 10.1128/JB.00505-12.
- 972 Tatusov, R. L., Koonin, E. V and Lipman, D. J. (1997) 'A genomic perspective on protein  
973 families', *Science*. American Association for the Advancement of Science, 278(5338), pp. 631–  
974 637.
- 975 Tolonen, A. C., Liszt, G. B. and Hess, W. R. (2006) 'Genetic manipulation of *Prochlorococcus*  
976 strain MIT9313: green fluorescent protein expression from an RSF1010 plasmid and Tn5  
977 transposition', *Applied and environmental microbiology*. 2006/10/13. American Society for

- 978 Microbiology, 72(12), pp. 7607–7613. doi: 10.1128/AEM.02034-06.
- 979 Traub, P. and Vorgias, C. E. (1983) 'Involvement of the N-terminal polypeptide of vimentin in  
980 the formation of intermediate filaments', *Journal of Cell Science*, 63(1), pp. 43 LP – 67.  
981 Available at: <http://jcs.biologists.org/content/63/1/43.abstract>.
- 982 Ungerer, J. and Pakrasi, H. B. (2016) 'Cpf1 Is A Versatile Tool for CRISPR Genome Editing  
983 Across Diverse Species of Cyanobacteria', *Scientific Reports*. Nature Publishing Group, 6, pp.  
984 1–9. doi: 10.1038/srep39681.
- 985 Vermaas, W. F. J. *et al.* (2002) 'Transformation of the cyanobacterium *Synechocystis* sp. PCC  
986 6803 as a tool for genetic mapping: optimization of efficiency', *FEMS Microbiology Letters*,  
987 206(2), pp. 215–219. doi: 10.1111/j.1574-6968.2002.tb11012.x.
- 988 Wagstaff, J. and Löwe, J. (2018) 'Prokaryotic cytoskeletons: protein filaments organizing small  
989 cells', *Nature Reviews Microbiology*. Nature Publishing Group. doi: 10.1038/nrmicro.2017.153.
- 990 Waidner, B. *et al.* (2009) 'A novel system of cytoskeletal elements in the human pathogen  
991 *Helicobacter pylori*', *PLoS Pathogens*. doi: 10.1371/journal.ppat.1000669.
- 992 Walshaw, J., Gillespie, M. D. and Kelemen, G. H. (2010) 'A novel coiled-coil repeat variant in  
993 a class of bacterial cytoskeletal proteins', *Journal of Structural Biology*, pp. 202–215. doi:  
994 10.1016/j.jsb.2010.02.008.
- 995 Weber, K. and Geisler, N. (1982) 'The structural relation between intermediate filament  
996 proteins in living cells and the alpha-keratins of sheep wool', *The EMBO journal*, 1(10), pp.  
997 1155–1160. Available at: <https://www.ncbi.nlm.nih.gov/pubmed/6202505>.
- 998 Weiss, G. L. *et al.* (2019) 'Structure and Function of a Bacterial Gap Junction Analog', *Cell*.  
999 Cell Press, 178(2), pp. 374-384.e15. doi: 10.1016/J.CELL.2019.05.055.
- 1000 Weissenbach, J. *et al.* (2017) 'Evolution of Chaperonin Gene Duplication in Stigonematalean  
1001 Cyanobacteria (Subsection V)', *Genome Biology and Evolution*, 9(1), pp. 241–252. doi:  
1002 10.1093/gbe/evw287.

- 1003 Wiche, G., Osmanagic-Myers, S. and Castañón, M. J. (2015) 'Networking and anchoring  
1004 through plectin: A key to IF functionality and mechanotransduction', *Current Opinion in Cell*  
1005 *Biology*, 32, pp. 21–29. doi: 10.1016/j.ceb.2014.10.002.
- 1006 Wickstead, B. and Gull, K. (2011) 'The evolution of the cytoskeleton', *Journal of Cell Biology*,  
1007 194(4), pp. 513–525. doi: 10.1083/jcb.201102065.
- 1008 Wilk, L. *et al.* (2011) 'Outer membrane continuity and septosome formation between vegetative  
1009 cells in the filaments of *Anabaena* sp. PCC 7120', *Cellular Microbiology*, 13(11), pp. 1744–  
1010 1754. doi: 10.1111/j.1462-5822.2011.01655.x.
- 1011 Wolk, C. P. *et al.* (1988) 'Isolation and complementation of mutants of *Anabaena* sp. strain  
1012 PCC 7120 unable to grow aerobically on dinitrogen.', *Journal of bacteriology*, 170(3), pp. 1239–  
1013 1244. doi: 10.1128/jb.170.3.1239-1244.1988.
- 1014 Yang, J. and Zhang, Y. (2015) 'I-TASSER server: New development for protein structure and  
1015 function predictions', *Nucleic Acids Research*, 43(W1), pp. W174–W181. doi:  
1016 10.1093/nar/gkv342.
- 1017 Yang, R. *et al.* (2004) 'AgIZ Is a Filament-Forming Coiled-Coil Protein Required for  
1018 Adventurous Gliding Motility of *Myxococcus xanthus*', *Journal of bacteriology*, 186(18), pp.  
1019 6168–6178. doi: 10.1128/JB.186.18.6168.
- 1020 Yu, N. Y. *et al.* (2010) 'PSORTb 3.0: Improved protein subcellular localization prediction with  
1021 refined localization subcategories and predictive capabilities for all prokaryotes',  
1022 *Bioinformatics*, 26(13), pp. 1608–1615. doi: 10.1093/bioinformatics/btq249.
- 1023 Zhang, C.-C. C. *et al.* (1995) 'Analysis of genes encoding the cell division protein FtsZ and a  
1024 glutathione synthetase homologue in the cyanobacterium *Anabaena* sp. PCC 7120', *Research*  
1025 *in Microbiology*, 146(6), pp. 445–455. doi: 10.1016/0923-2508(96)80290-7.
- 1026 Zhang, Y. (2009) 'I-TASSER: Fully automated protein structure prediction in CASP8', *Proteins:*  
1027 *Structure, Function and Bioinformatics*, 77(SUPPL. 9), pp. 100–113. doi: 10.1002/prot.22588.



1028 Zhou, J. *et al.* (2014) 'Discovery of a super-strong promoter enables efficient production of  
1029 heterologous proteins in cyanobacteria', *Scientific Reports*, 4, pp. 1–6. doi:  
1030 10.1038/srep04500.

1031

1032 **Figures**

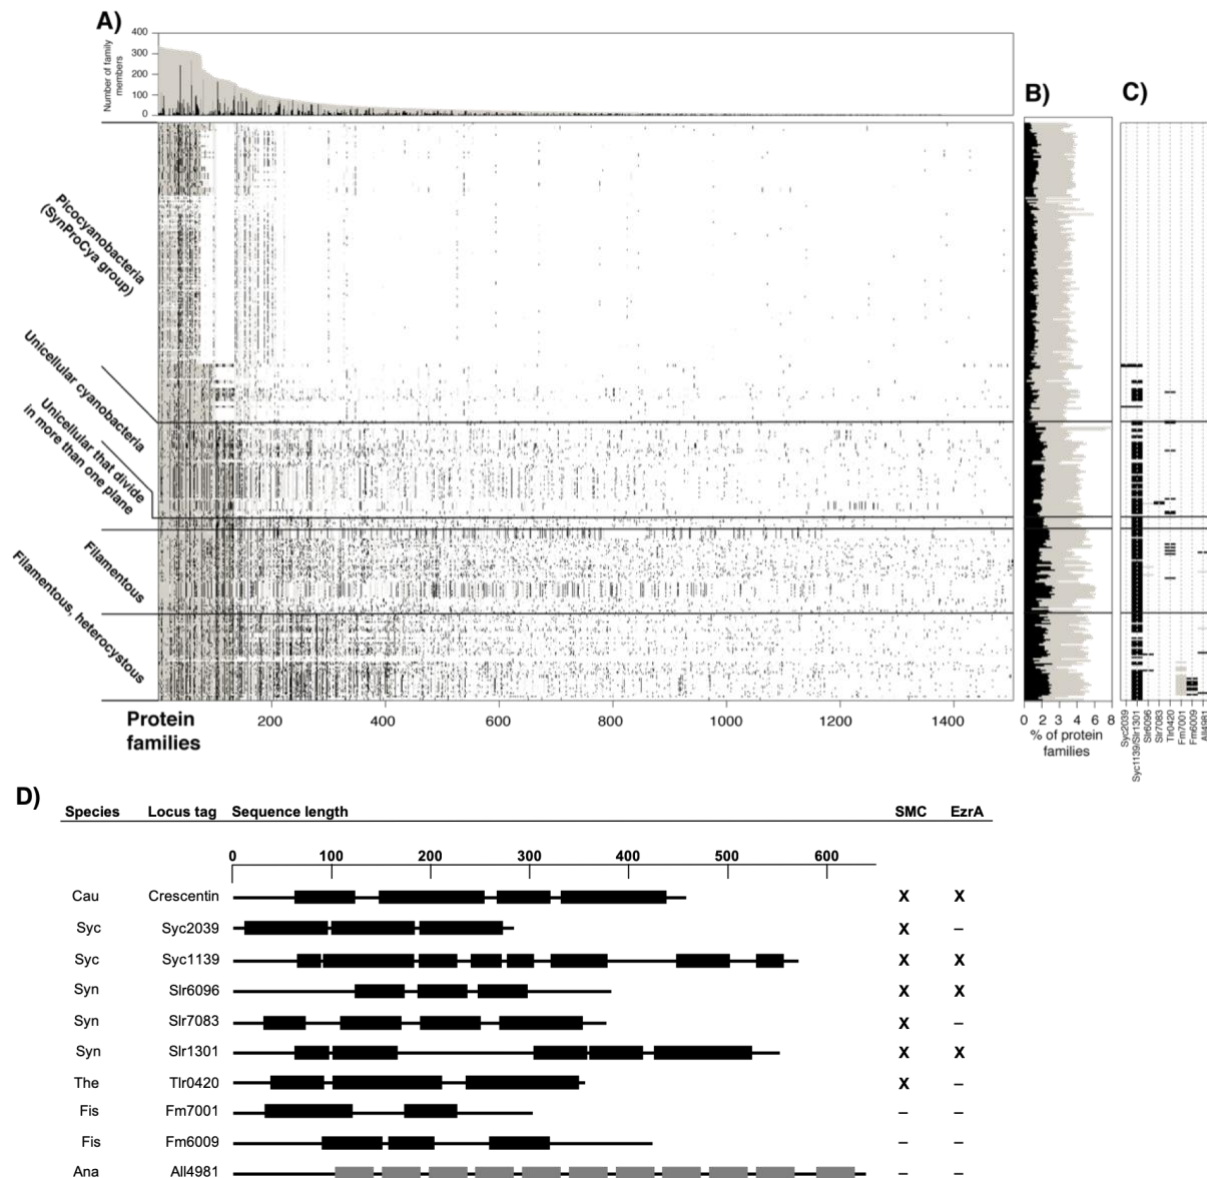

1033

1034 **Fig. 1: Distribution of CCRP protein families within cyanobacteria**

1035 (A) Lines in the presence/absence matrix designate cyanobacterial genomes; each column shows a protein family.  
 1036 Gray dots designate any homologous protein in the same protein family and black dots represent CCRP members.  
 1037 Protein families are sorted according to the number of members. Protein family size and the number of CCRP  
 1038 members are presented in a bar graph above. (B) The proportion of protein families containing CCRPs (gray) and  
 1039 CCRP proteins (black) in each genome. (C) Presence/absence pattern of CCRP candidate protein families. Only  
 1040 protein families with at least three members predicted to be CCRPs are shown. (D) Domain prediction of CCRP  
 1041 candidates. Scale on top is given in amino acid residues. Amino acid sequences in coiled-coil conformation are  
 1042 depicted by black bars with non-coiled-coil sequences represented by black lines. Tetratricopeptide repeats (TPR),  
 1043 also predicted by the COILS algorithm, are shown as grey bars. Proteins are given as cyanobase locus tags.  
 1044 Fm7001 and Fm6009 correspond to NCBI accession numbers WP\_016868005.1 and WP\_020476706,  
 1045 respectively. Abbreviations: Cau: *C. crescentus*; Syc: *Synechococcus*, Syn: *Synechocystis*; Ana: *Anabaena*; The:  
 1046 *Thermosynechococcus elongatus* BP-1; Fis: *Fischerella*. Cyanobacterial CCRPs had conserved domains present  
 1047 in prokaryotic IF-like CCRPs and eukaryotic IF proteins (Supplementary Table 1). Presence of a structural  
 1048 maintenance of chromosomes (SMC) domain or structural similarities to the cell division protein EzrA are marked  
 1049 with "X", absence is indicated with "-". Full list is given in Supplementary Table 1. Note: *Anabaena* CCRPs have  
 1050 been described elsewhere before: *Springstein et al.* (2019), bioRxiv, doi: 10.1101/553073.

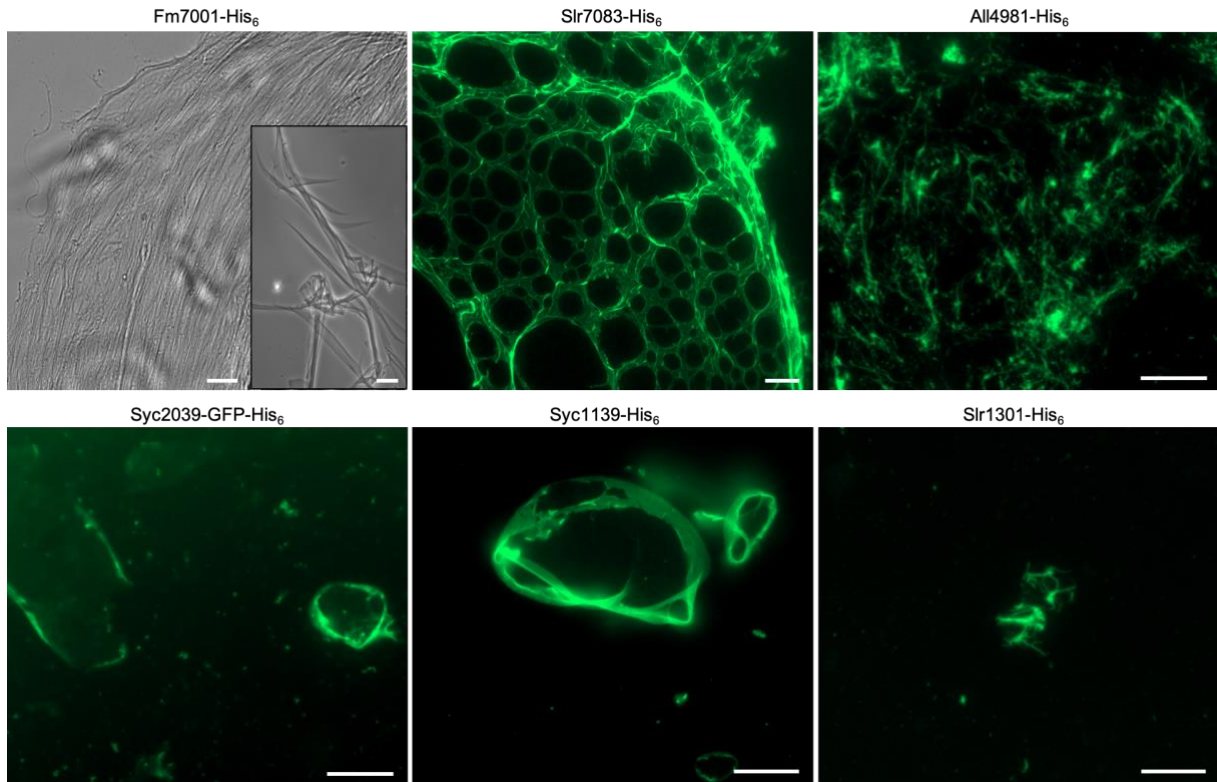

1051

1052 **Fig. 2: Cyanobacterial CCRPs assemble into diverse filamentous structures *in vitro***

1053 Bright field and epifluorescence micrographs of filamentous structures formed by purified and renatured Fm7001-  
1054 His<sub>6</sub> (0.7 mg ml<sup>-1</sup>), Slr7083-His<sub>6</sub> (1 mg ml<sup>-1</sup>), All4981-His<sub>6</sub> (0.5 mg ml<sup>-1</sup>), Syc2039-GFP-His<sub>6</sub> (0.3 mg ml<sup>-1</sup>), Syc1139-  
1055 His<sub>6</sub> (0.5 mg ml<sup>-1</sup>) and Slr1301-His<sub>6</sub> (0.5 mg ml<sup>-1</sup>). Proteins were dialyzed into 2 mM Tris-HCl, 4.5 M urea pH 7.5  
1056 (Fm7001), HLB (Slr7083), PLB (All4981, Syc1139, Slr1301) or BG11 (Syc2039). Renatured proteins were either  
1057 directly analyzed by bright field microscopy (Fm7001) or stained with an excess of NHS-Fluorescein and analyzed  
1058 by epifluorescence microscopy. The NHS-Fluorescein dye binds primary amines and is thus incompatible with urea,  
1059 which is why Fm7001 filaments were visualized by bright field microscopy. Scale bars: 10 µm or (Fm7001 inlay and  
1060 Slr7083) 20 µm.

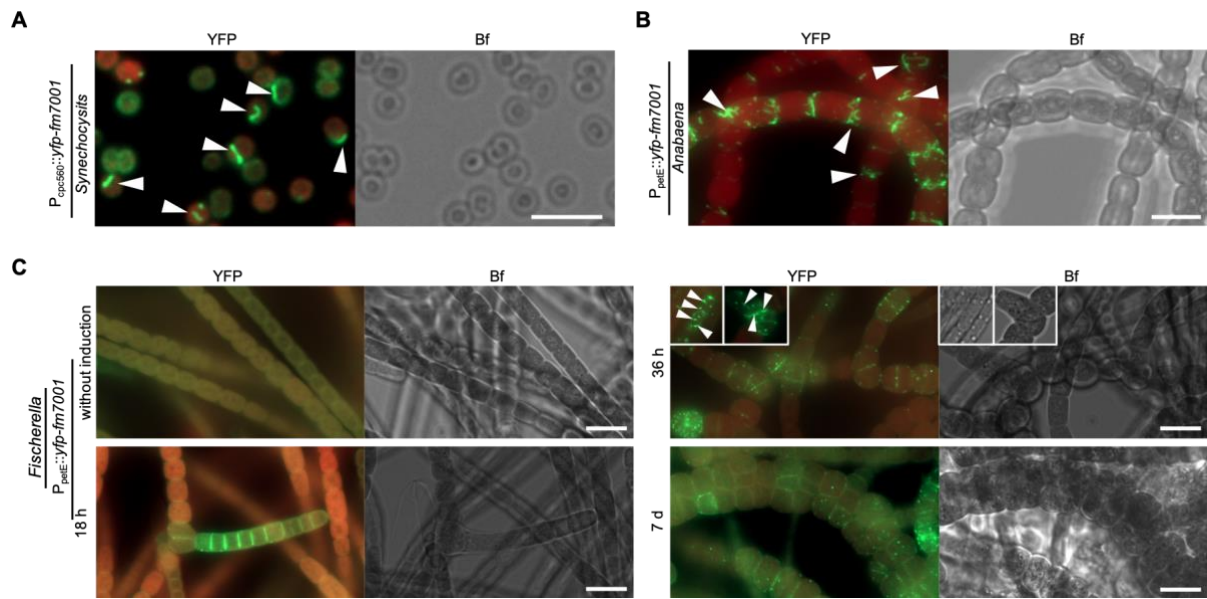

1061

1062 **Fig. 3: Host-independency for Fm7001 *in vivo* filamentation**

1063 Merged GFP fluorescence and chlorophyll autofluorescence (red) and bright field micrographs of (A) *Synechocystis*,  
1064 (B) *Anabaena* or (C) *Fischerella* cells expressing YFP-Fm7001. Cells were either grown in (A,B) BG11 or (C) BG11  
1065 without copper and then induced with 0.5 μM CuSO<sub>4</sub>. (C) Micrographs were taken before induction of *yfp-fm7001*  
1066 expression (without induction) and 18 h, 36 h or 7 d post induction. White triangles point to selected YFP-Fm7001  
1067 filamentous strings within the cells. Notably, unlike in *Anabaena* and *Fischerella*, Fm7001-GFP induced a swollen  
1068 morphotype in *E. coli* and a subpopulation of *Synechocystis* cells (Supplementary Fig. 1E). (B): maximum intensity  
1069 projection of a Z-stack. Scale bars: (A,B) 5 μm, (C) 10 μm.

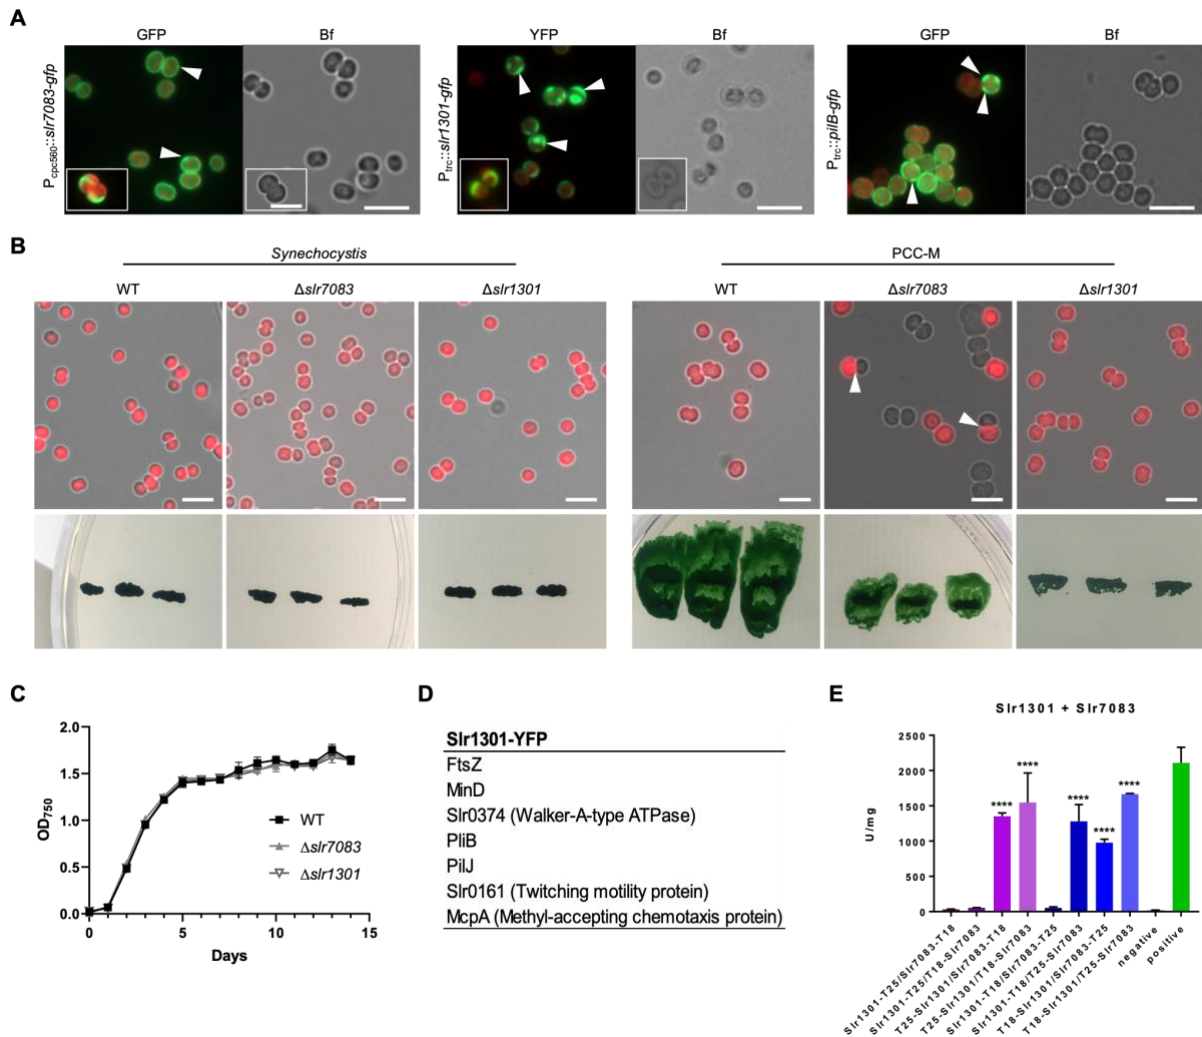

1070

1071

**Fig. 4: Slr7083 and Slr1301 are involved in twitching motility in *Synechocystis***

1072

1073

1074

1075

1076

1077

1078

1079

1080

1081

1082

1083

1084

1085

1086

1087

(A) Merged GFP fluorescence and chlorophyll autofluorescence (red) and bright field micrographs of *Synechocystis* cells expressing, Slr7083-GFP, Slr1301-YFP or PilB-GFP from  $P_{P_{cpc560}}$  (Slr7083) or  $P_{trc}$  (Slr1301, PilB). Expression of PilB-GFP in PCC-M resulted in the same localization pattern (data not shown). White triangles indicate focal spots and crescent-like formations. Scale bars: 5  $\mu$ m. (B) Merged bright field and chlorophyll autofluorescence micrographs of motile and non-motile *Synechocystis* WT,  $\Delta slr7083$  and  $\Delta slr1301$  mutant cells. Below, motility tests of three single colonies from indicated cells streaked on BG11 plates and illuminated from only one direction are shown. (C) Growth curve of *Synechocystis* WT,  $\Delta slr7083$  and  $\Delta slr1301$  mutant strains grown in quadruples at standard growth conditions. OD<sub>750</sub> values were recorded once a day for 15 d. Error bars show the standard deviation (n=4). (D) Excerpt of interacting proteins of interest from mass spectrometry analysis of anti-GFP co-immunoprecipitations of *Synechocystis* cells expressing Slr1301-YFP from  $P_{trc}$ . (E) Beta-galactosidase assays of *E. coli* cells co-expressing indicated translational fusion constructs of all possible pair-wise combinations of Slr7083 with Slr1301 grown for 1 d at 30 °C. Quantity values are given in Miller Units per milligram LacZ of the mean results from three independent colonies. Error bars indicate standard deviations (n=3). Neg: pKNT25 plasmid carrying *slr1301* co-transformed with empty pUT18C. Pos: Zip/Zip control. Values indicated with \* are significantly different from the negative control. \*: P<0.05, \*\*: P<0.01, \*\*\*: P<0.001, \*\*\*\*: P<0.0001 (Dunnett's multiple comparison test and one-way ANOVA).

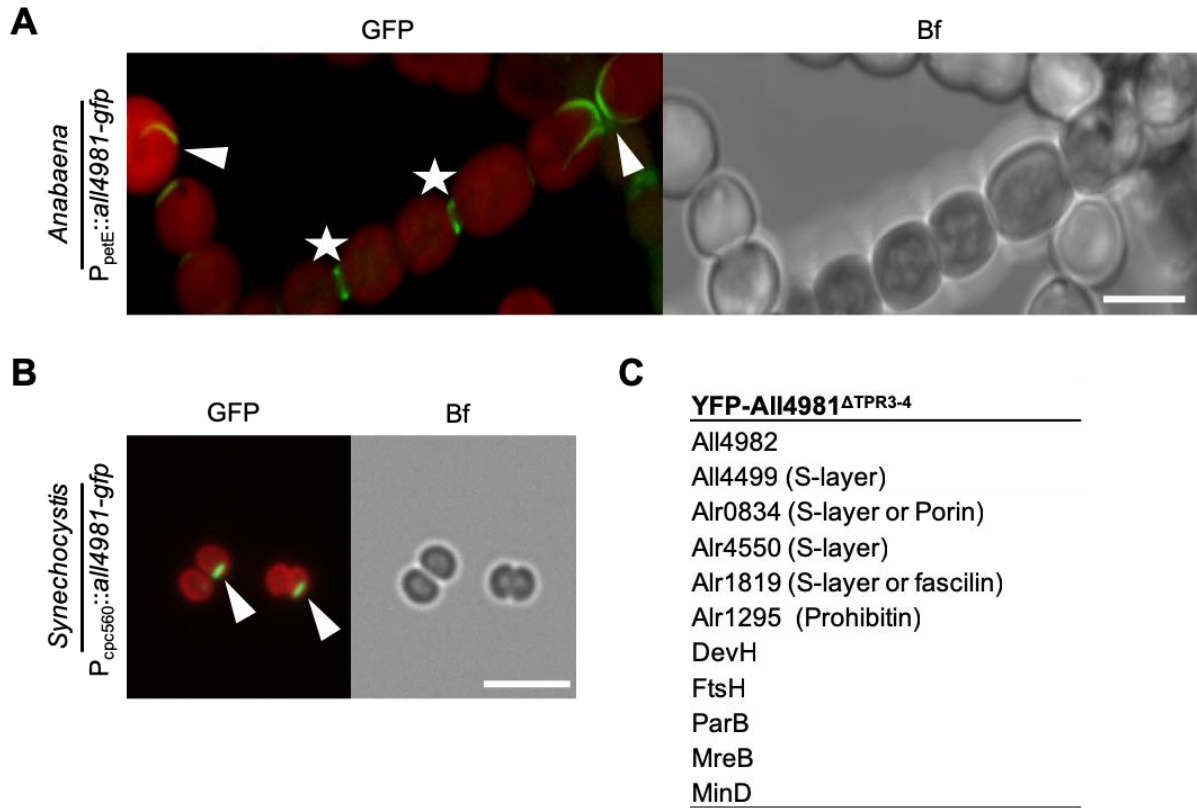

1088

1089 **Fig. 5: All4981 forms cell-traversing filaments in cyanobacteria**

1090 (A,B) GFP fluorescence and merged GFP fluorescence and chlorophyll autofluorescence (red) and bright field  
1091 micrographs of (A) *Anabaena* and (B) *Synechocystis* cells expressing All4981-GFP. *Anabaena* cells were grown in  
1092 BG11<sub>o</sub> and *Synechocystis* cells were grown in BG11. (A): Maximum intensity projections of a Z-stack. White  
1093 triangles indicate selected filaments traversing through the cells. White arrows point to spindle-like YFP-All4981  
1094 filaments. White stars mark septal formations between two neighboring cells. Scale bars: 5  $\mu$ m. (C) Excerpt of  
1095 interacting proteins of interest from mass spectrometry analysis of anti-GFP co-immunoprecipitations of *Anabaena*  
1096 cells expressing YFP-All4981<sup>ΔTPR3-4</sup> from P<sub>petE</sub>.

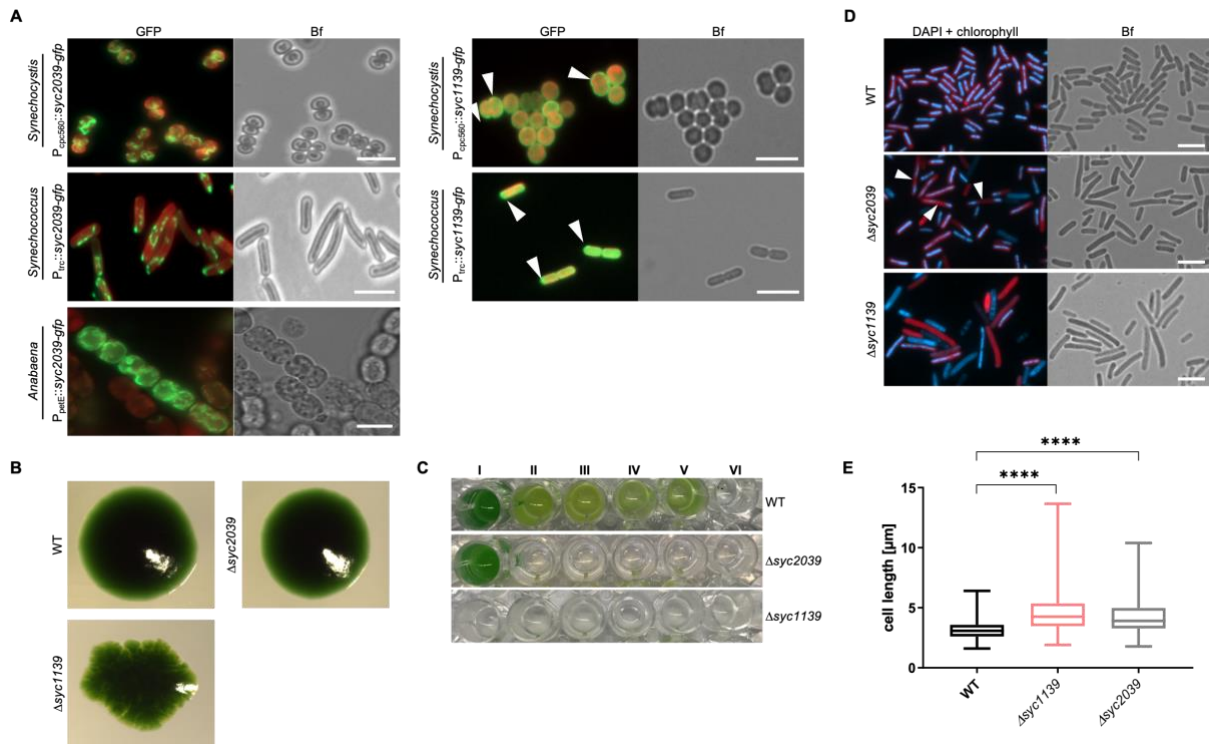

1097

1098 **Fig. 6: *Synechococcus* CCRPs affect cytokinesis and cellular integrity**

1099 **(A)** Merged GFP fluorescence and chlorophyll autofluorescence (red) and bright field micrographs of *Synechocystis*,  
 1100 *Synechococcus* and *Anabaena* cells expressing Syc2039-GFP or Syc1139-GFP from  $P_{trc}$ . *Synechocystis* cells were  
 1101 grown in BG11, *Anabaena* cells were grown in BG11<sub>0</sub> supplemented with 0.25  $\mu$ M CuSO<sub>4</sub> for 1 day, and  
 1102 *Synechococcus* cells were grown on BG11 plates supplemented with 0.01 mM (Syc2039) or 1 mM (Syc1139) IPTG.  
 1103 Micrographs of *Synechococcus* and *Anabaena* cells expressing Syc2039-GFP are maximum intensity projections  
 1104 of a Z-stack. White triangles indicate Syc1139-GFP spots. Attempts to translationally fuse a YFP-tag to the N-  
 1105 terminus of Syc2039 were unsuccessful, possibly due to the transmembrane domain predicted to the Syc2039 N-  
 1106 terminus (Supplementary Table 1). **(B)** Colony formation of *Synechococcus* WT and mutant strains on BG11 plates.  
 1107 **(C)** Cell viability of *Synechococcus* WT and mutant strains grown in (I) BG11 or BG11 supplemented with (II) 5 mM  
 1108 glucose, (III) 200 mM glucose, (IV) 2 mM NH<sub>4</sub>Cl, (V) 200 mM maltose or (VI) 500 mM NaCl. **(D)** Merged DAPI  
 1109 fluorescence and chlorophyll autofluorescence (red) and bright field micrographs of *Synechococcus* WT and mutant  
 1110 strains grown on BG11 plates and stained with 10  $\mu$ g ml<sup>-1</sup> DAPI. White triangles indicate non-dividing cells revealing  
 1111 inhomogeneous DNA placement. **(E)** Cell length of *Synechococcus* WT (n=648), non-segregated  $\Delta$ syc1139  
 1112 (n=417) and  $\Delta$ syc2039 (n=711) mutant cells. Values indicated with \* are significantly different from the WT.  
 1113 \*\*\*\*: P<0.0001 (one-way ANOVA, using Turkey's multiple comparison test). Scale bars: 5  $\mu$ m.

*Fischerella*

Fm7001

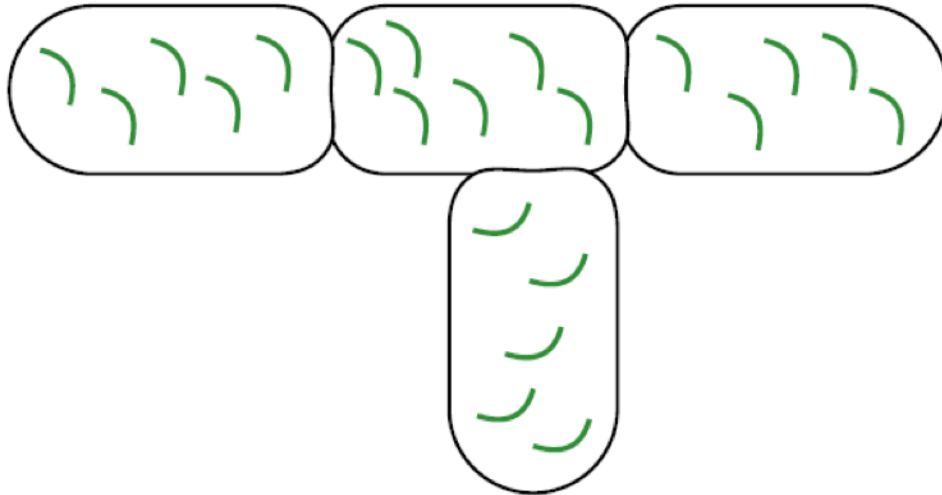

*Anabaena*

All4981

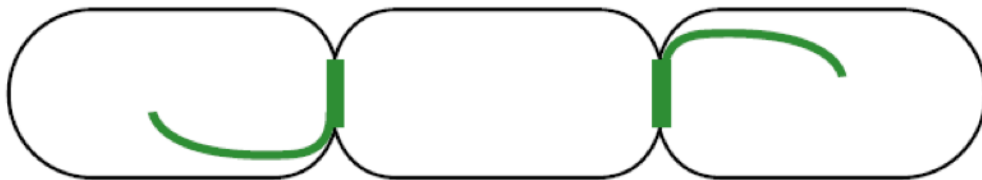

*Synechococcus*

Syc2039/Syc1139

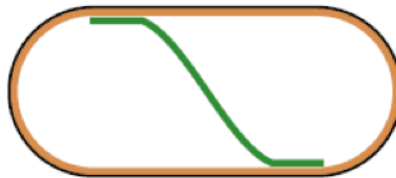

*Synechocystis*

Slr1301/Slr7083

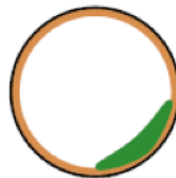

1114

1115 **Fig. 7: Cyanobacterial CCRP systems**

1116 Schematic models for the *in vivo* localization of cyanobacterial CCRPs in their respective hosts. Fm7001 forms  
1117 filamentous strings in *Fischerella*. In *Anabaena*, All4981 assembles into pole-arising filaments that traverse through  
1118 the cell or forms septal-localized bridge-like formations. Syc2039, either independently of other *Synechococcus*  
1119 proteins, or in direct cooperation with other filamentous proteins, forms long and sometimes helical strings that are  
1120 often aligned with or in close proximity to the cell periphery. In *Synechococcus*, Syc1139 likely forms a protective  
1121 proteinaceous layer below the cytoplasmic membrane. In *Synechocystis*, Slr1301 forms crescent-like structures  
1122 while Slr7083 seemingly underlies the cytoplasmic membrane. Both localization types were also observed for PilB,  
1123 suggesting a cooperative function.



1124 **Supplementary Information**

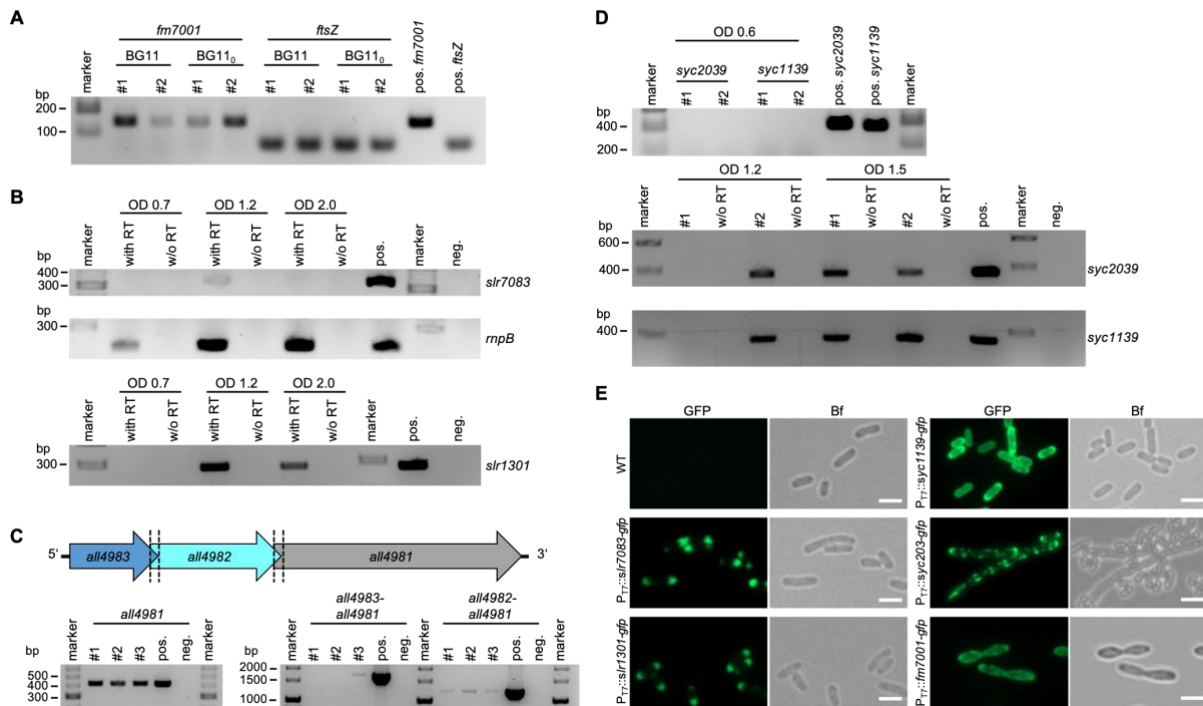

1125

1126 **Supplementary Fig. 1: Expression of candidate CCRPs and heterologous expression in *E. coli***

1127 (A) RT-PCR of reverse transcribed whole RNA from young *Fischerella* WT cultures grown in BG11 or BG11<sub>0</sub> from  
 1128 two independent biological replicates. Gene transcripts were verified using internal *fm7001* gene primers (#1/#2) or  
 1129 internal *ftsZ* gene primers (#3/#4) as a control. (B) RT-PCR of reverse transcribed whole RNA from *Synechocystis*  
 1130 WT (OD<sub>750</sub> 0.7, 1.2 or 2.0) grown in BG11 using internal *slr7083* gene primers (#5/#6) or internal *slr1301* gene  
 1131 primers (#9/#10). Internal *mpB* gene primers (#7/#8) were included as a control. (C, top) Schematic representation  
 1132 of the genomic context of *all4981*. The 3' end of *all4983* overlaps with 4 bp with the 5' region of *all4982*, which has  
 1133 the same overlap with the 5' end of *all4981*. Both overlaps are comprised of the same four nucleotides (ATGA). (C,  
 1134 bottom) RT-PCR of reverse transcribed whole RNA from *Anabaena* WT cultures grown in BG11 (OD<sub>750</sub> 1.8) from  
 1135 three independent biological replicates. *all4981* gene transcript was internal gene primers (#15/#16). For operon  
 1136 structure of *all4983-all4981* or *all4982-all4981*, primer pairs #17/#16 or #18/#16 were used, respectively. Only one  
 1137 replicate showed a common transcript for an *all4983-all4981* operon, which is likely is the result of the long fragment  
 1138 (about 1800 bp). The employed cDNA synthesis kit is optimized for fragments up to 1000 bp, thus making longer  
 1139 reverse transcriptions unlikely. (D) RT-PCR of reverse transcribed whole RNA from *Synechococcus* WT (OD<sub>750</sub> 0.6,  
 1140 1.2 or 1.5) grown in BG11 from two independent biological replicates. Gene transcripts were verified using internal  
 1141 *syc2039* gene primers (#11/#12) and internal *syc1139* gene primers (#13/#14). (B,D) RNA was either reverse  
 1142 transcribed in the reaction buffer containing reverse transcriptase (with RT) or without reverse transcriptase (w/o  
 1143 RT) as a control for residual genomic DNA contamination. (A-D) Genomic DNA of the respective species was  
 1144 included as positive control for the different reactions. (E) GFP fluorescence and bright field micrographs of *E. coli*  
 1145 BL21 (DE3) cells expressing Slr7083-GFP, Slr1301-GFP, Syc1139-GFP, Syc2039-GFP or Fm7001-GFP. Cells  
 1146 were grown at 20 °C or (Fm7001-GFP) 16 °C and protein expression was induced with 0.05 mM IPTG for 24 h.  
 1147 Scale bars: 2.5 μm.

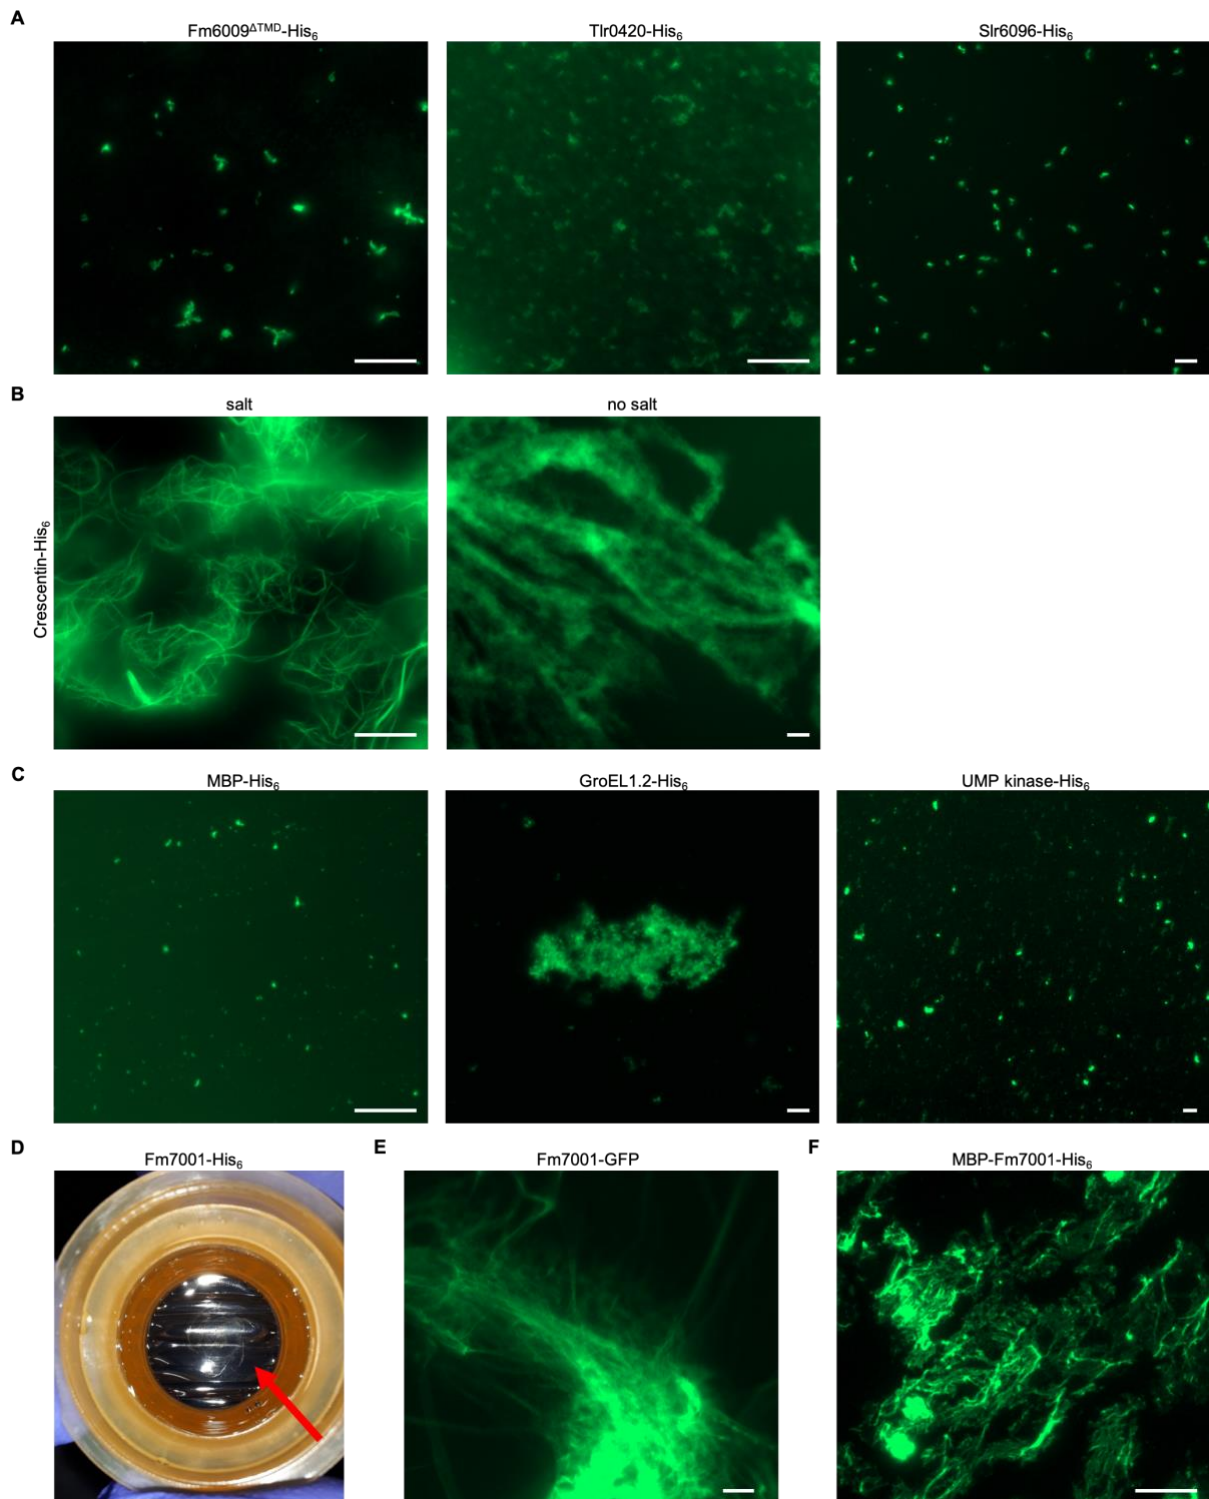

1148

1149 **Supplementary Fig. 2: *In vitro* polymerization is dependent on monovalent ions**

1150 (A-C) NHS-fluorescein fluorescence micrographs of *in vitro* structures formed by purified and renatured  
1151 Fm6009<sup>ΔTMD</sup>-His<sub>6</sub> (lacking the transmembrane domain, i.e. the first 91 aa), Tlr0420-His<sub>6</sub> or Slr6096-His<sub>6</sub> (1 mg ml<sup>-1</sup>  
1152 each), Crescentin-His<sub>6</sub> (0.7 mg ml<sup>-1</sup>), MBP-His<sub>6</sub> (1 mg ml<sup>-1</sup>), GroEL1.2 (0.7 mg ml<sup>-1</sup>) or UMP kinase (0.5 mg ml<sup>-1</sup>),  
1153 in HLB or Crescentin-His<sub>6</sub> (0.7 mg ml<sup>-1</sup>) renatured in 25 mM Hepes, pH 7.4. Note: Crescentin-His<sub>6</sub> *in vitro*  
1154 polymerization into smooth filaments is strictly dependent of the presence of salt in the renaturation buffer as  
1155 Crescentin-His<sub>6</sub> without salt assembles into filamentous aggregates only. (A) Proteins were dialyzed in a stepwise  
1156 urea-decreasing manner and stained with an excess of NHS-Fluorescein. (D) Bright field micrograph of a sheet-  
1157 like flat object floating on top of the dialysate (red arrow) formed upon dialysis of Fm7001-His<sub>6</sub> (0.7 mg ml<sup>-1</sup>) into 2  
1158 mM Tris-HCl, 4.5 M urea, pH 7.5. (E,F) Epifluorescence micrographs of filamentous structures formed by (E)

1159 denatured cell-free extracts of *E. coli* BL21 (DE3) expressing Fm7001-GFP (0.7 mg ml<sup>-1</sup> whole protein) dialyzed  
1160 into 2 mM Tris-HCl, 3 M urea, pH 7.5 or by (F) natively purified MBP-Fm7001-His<sub>6</sub> (0.8 mg ml<sup>-1</sup>) stained with NHS-  
1161 fluorescein in HLB. Scale bars: 10 μm.

**A**

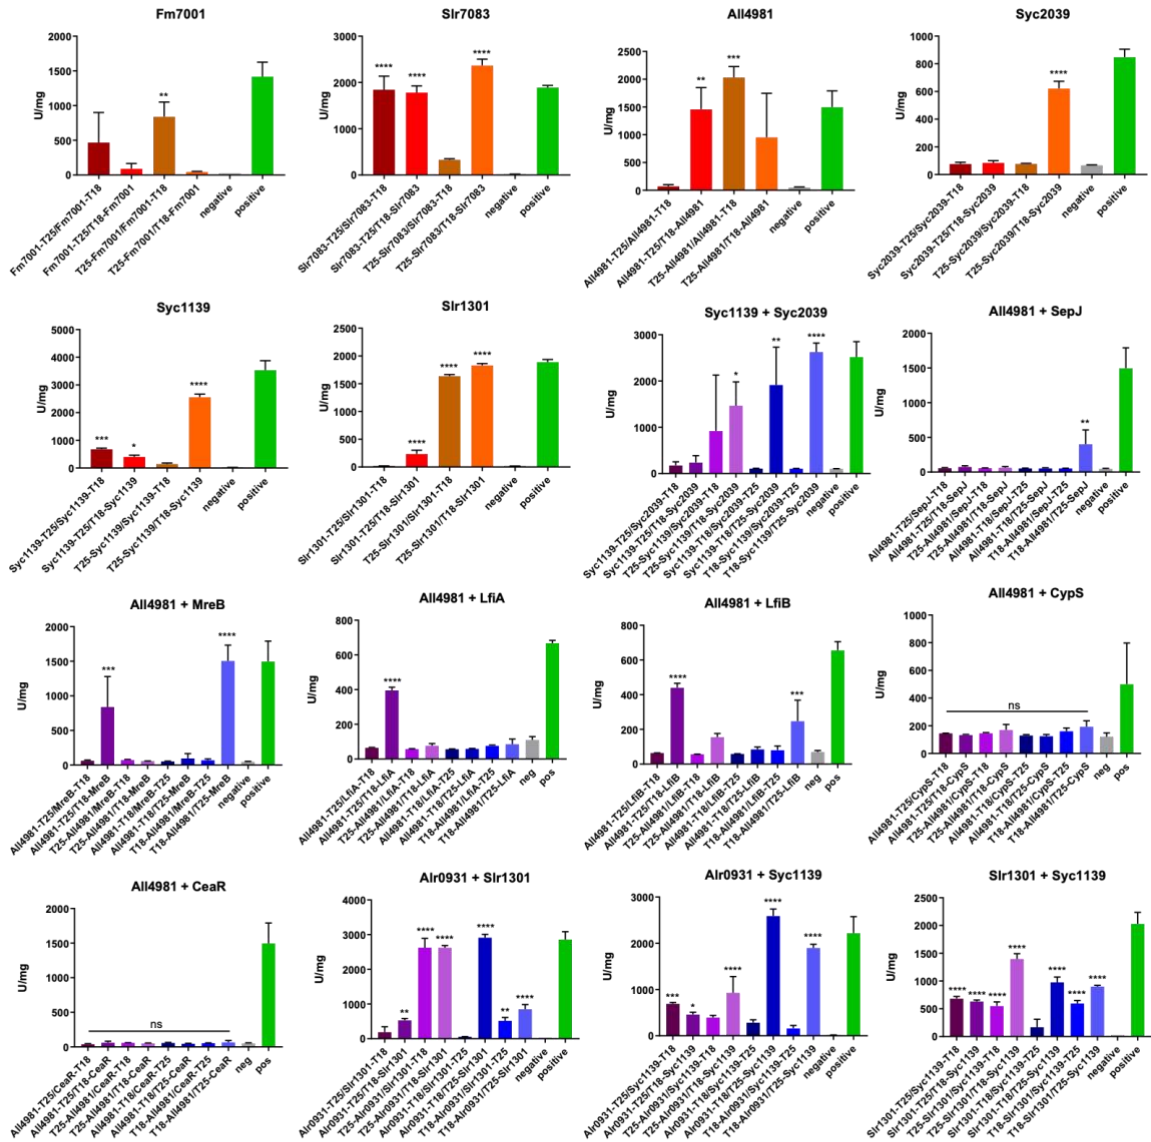

**B**

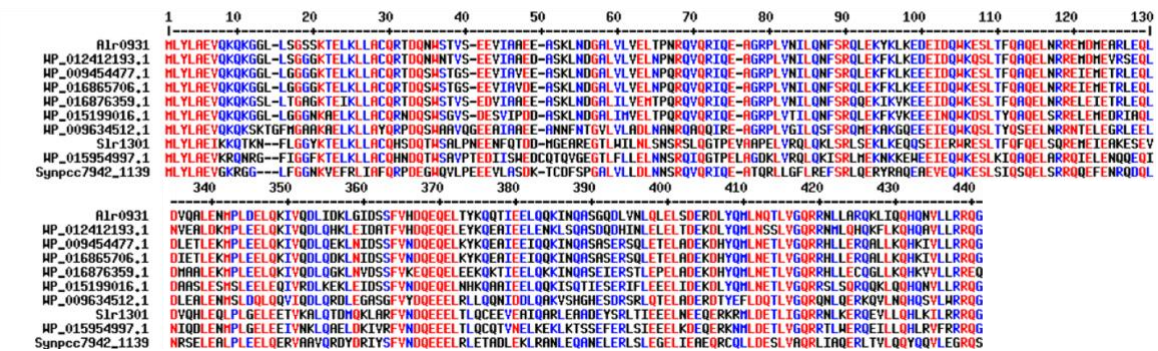

1162

1163

**Supplementary Fig. 3: BACTH analysis of cyanobacterial CCRPs**

1164

(A) Beta-galactosidase assays (BACTH) of *E. coli* BTH101 cells co-expressing indicated T25 and T18 translational fusions of all possible pair-wise combinations from three independent colonies grown for 1 d at 30 °C or 2 d at 20 °C. Quantity values are given in Miller Units per milligram LacZ of the mean results from three independent colonies. Negative: N-terminal T25 fusion construct of the respective protein co-transformed with empty pUT18C. Positive: Zip/Zip control. Error bars indicate standard deviations (n=3). Values indicated with \* are significantly different from the negative control. \*: P < 0.05, \*\*: P < 0.01, \*\*\*: P < 0.001, \*\*\*\*: P < 0.0001 (one-way ANOVA using Dunnett's multiple comparison test). (B) Multiple sequence alignment of selected cyanobacterial homologous CCRPs using

1170

1171 MULTALIGN (Corpet, 1988). Alr0931 (termed CypS; *Anabaena*), Slr1301 (*Synechocystis*) and Synpcc7942\_1139  
1172 (*Synechococcus*) are identified by their designated cyanobase locus tag. Other proteins are given as NCBI  
1173 accession numbers. WP\_012412193.1 (*Nostoc punctiforme* PCC 73102), WP\_009454477.1 (*Fischerella thermalis*  
1174 PCC 7521), WP\_016865706.1 (*Fischerella*), WP\_016876359.1 (*C. fritschii* PCC 9212), WP\_015199016.1  
1175 (*Calothrix* sp. PCC 6303), WP\_009634512.1 (*Synechocystis* sp. PCC 7509), and WP\_015954997.1 (*Cyanothece*  
1176 sp. PCC 7424). Amino acids from 1-130 and 334-441 are depicted. Red highlighted amino acid residues are  
1177 conserved among all listed species, blue amino acids are mostly conserved, and black amino acids are not  
1178 conserved. Characteristic for this group of conserved cyanobacterial CCRPs is a highly conserved N-terminus with  
1179 a M-L-Y-L-A-E-V sequence motif present in nearly all homologs, followed by a moderately conserved N-terminal  
1180 region of the first 120 amino acids. Two other highly conserved domains are present in this group, one located  
1181 around the centre of the proteins (between the 340<sup>th</sup> and 370<sup>th</sup> amino acid), and another one shortly thereafter  
1182 between the 400<sup>th</sup> and 420<sup>th</sup> amino acid.

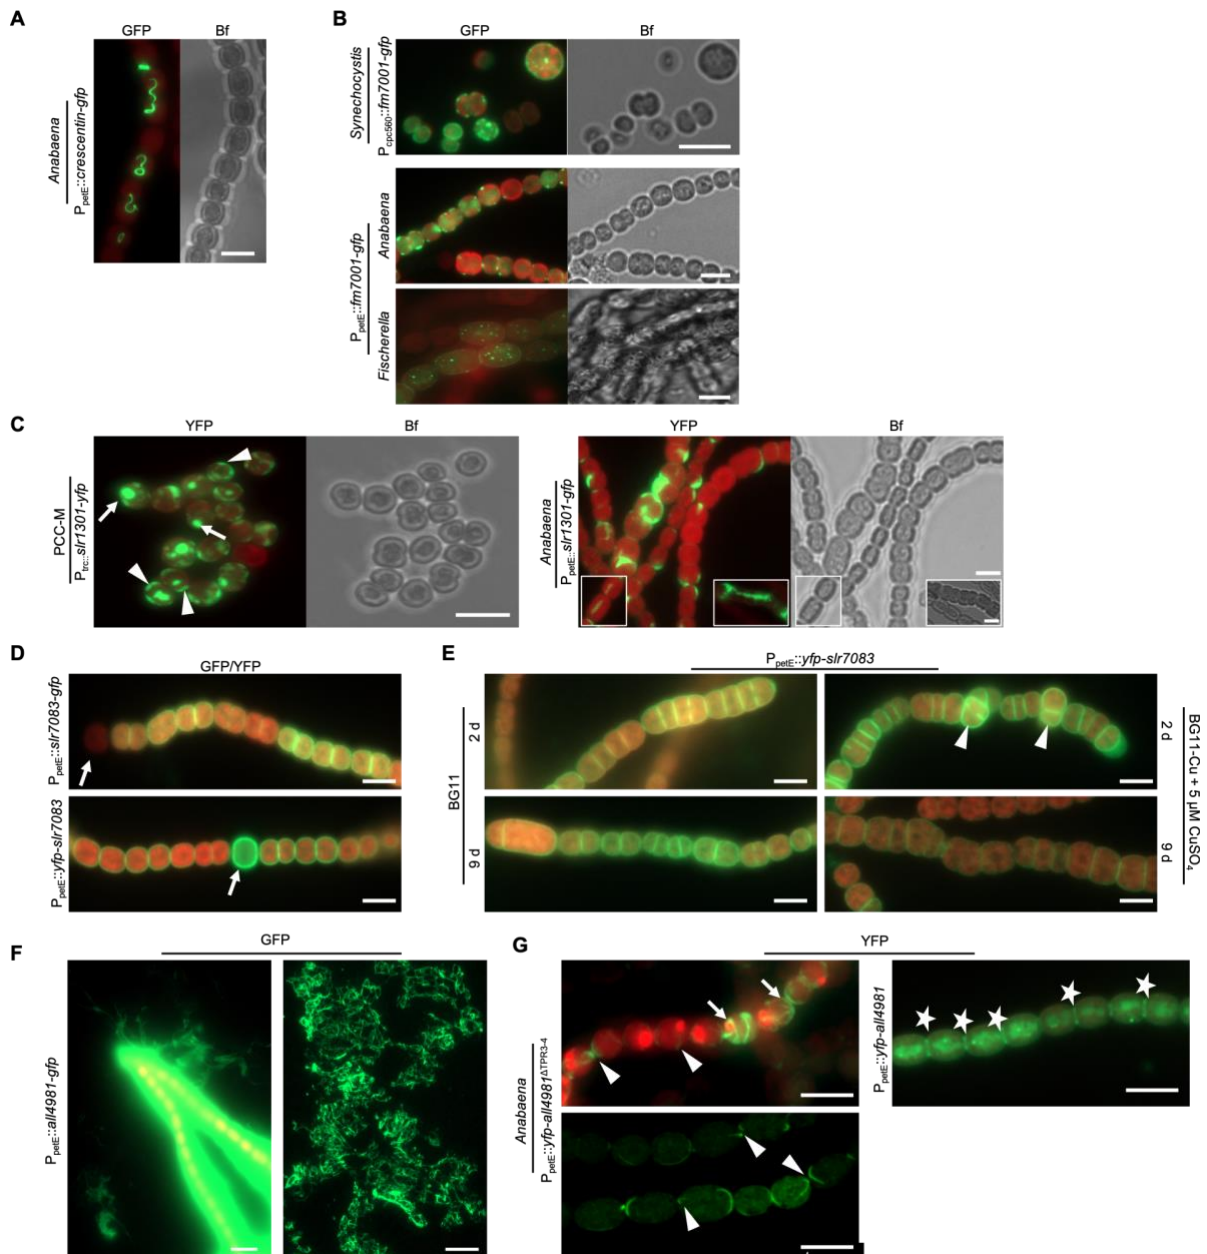

1183

1184 **Supplementary Fig. 4: Expression of candidate CCRPs in different cyanobacterial species**

1185 GFP fluorescence, chlorophyll autofluorescence (red) and bright field micrographs of *Synechocystis*, *Anabaena* or  
 1186 *Fischerella* cells expressing (A) Crescentin-GFP, (B) Fm7001-GFP, (C) Slr1301-GFP, (D) Slr7083-GFP, (E) YFP-  
 1187 Slr7083, (F) All4981-GFP or (G) YFP-All4981<sup>ΔTPR3-4</sup> or YFP-All4981 from P<sub>petE</sub>, P<sub>trc</sub>, or P<sub>opc560</sub>. (B) Unlike N-terminal  
 1188 fusion with a YFP tag, no *in vivo* filaments can be observed upon C-terminal fusion of Fm7001 with a GFP-tag in  
 1189 any tested cyanobacterium. (C) Besides intracellular filaments (figure inlays), Slr1303 accumulated at the periphery  
 1190 within *Anabaena* cells and induced a partial swollen cell phenotype. White triangles mark crescent-like localizations.  
 1191 White arrows show Slr1301-YFP accumulations. (D) *Anabaena* cells were grown on BG11<sub>0</sub> plates. White arrows  
 1192 indicate heterocysts. (E) *Anabaena* cells expressing YFP-Slr7083 from P<sub>petE</sub> grown in liquid BG11 or liquid BG11  
 1193 without copper and induced with 5 μM CuSO<sub>4</sub> for 2 and 9 d. White triangles point to multiserial *Anabaena* trichome  
 1194 growth upon protein overexpression. (F) *Anabaena* cells expressing All4981-GFP from P<sub>petE</sub> grown in BG11  
 1195 supplemented with 0.5 μM CuSO<sub>4</sub> for 2 d. Extended period of overexpression of All4981-GFP led to cell rupture.  
 1196 Protein filaments released from the *Anabaena* trichome are shown in the left image while the right image shows  
 1197 extracellular (*ex vivo*) filaments observed in the growth medium. (G) *Anabaena* cells were grown in BG11<sub>0</sub>  
 1198 supplemented with 0.5 μM CuSO<sub>4</sub>. White triangles indicate selected filaments traversing through the cells. White  
 1199 arrows point to spindle-like YFP-All4981<sup>ΔTPR3-4</sup> filaments. White stars mark septal localizations. Scale bars: (A-D,G)  
 1200 5 μm, (F, left) 10 μm or (F, right) 20 μm.

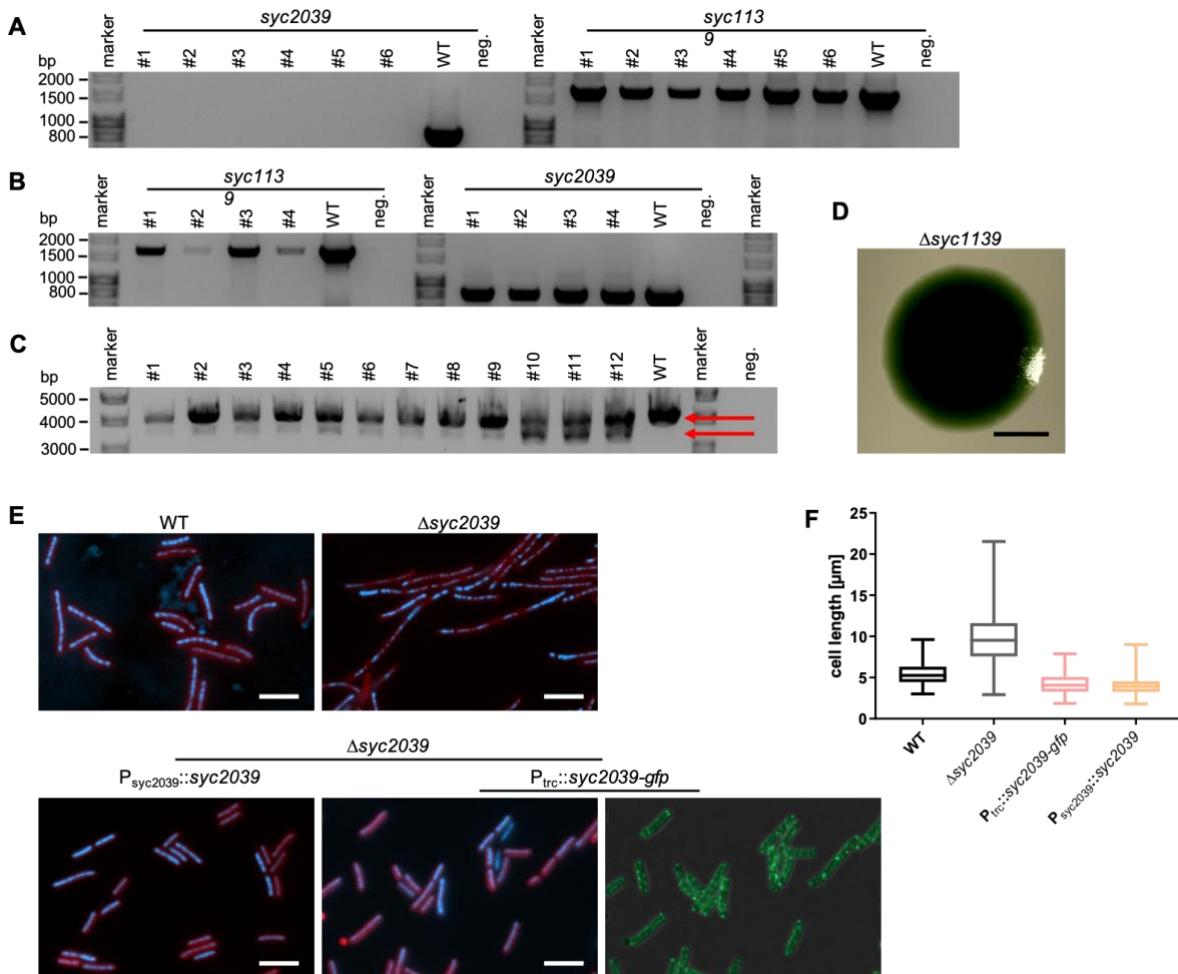

1201

1202 **Supplementary Fig. 5: Verification of *Synechococcus* CCRP mutants**

1203 (A) Colony PCR of six  $\Delta syc2039$  mutant clones using *syc2039* gene primers (#149/#147) and *syc1139* gene primers  
 1204 (#161/#162) as a control. (B) Colony PCRs of four non-segregated  $\Delta syc1139$  mutant clones using *syc1139* gene  
 1205 primers (#174/#175) or *syc2039* gene primers (#159/#160) as a control. (C) Colony PCR of twelve non-segregated  
 1206  $\Delta syc1139$  mutant clones using primers encompassing the homologous flanking regions used for homologous  
 1207 recombination (#238/#239). Upper red arrow indicates WT allele PCR product. Lower red arrow indicates  $\Delta syc1139$   
 1208 mutant PCR product. As a positive control, *Synechococcus* genomic DNA was included. (D) Growth of  $\Delta syc1139$   
 1209 mutant on non-selective plates leads to a reversal to WT phenotype. (E) Merged DAPI fluorescence and chlorophyll  
 1210 autofluorescence (red) and merged GFP fluorescence and bright field micrographs of *Synechococcus* WT,  
 1211  $\Delta syc2039$  mutant and  $\Delta syc2039$  mutant complemented with  $P_{syc2039}::syc2039$  or  $P_{trc}::syc2039-gfp$  inserted into the  
 1212 neutral NS1 locus. Cells were grown in BG11 or BG11 supplemented with 0.001 mM IPTG (for strain carrying  
 1213  $P_{trc}::syc2039-gfp$ ) and stained with  $10 \mu\text{g ml}^{-1}$  DAPI. (F) Cell length of *Synechococcus* WT (n=505),  $\Delta syc2039$   
 1214 mutant (n=517),  $\Delta syc2039$  mutant carrying  $P_{trc}::syc2039-gfp$  (n=547) and  $\Delta syc2039$  mutant carrying  
 1215  $P_{syc2039}::syc2039$  (n=529) cells.

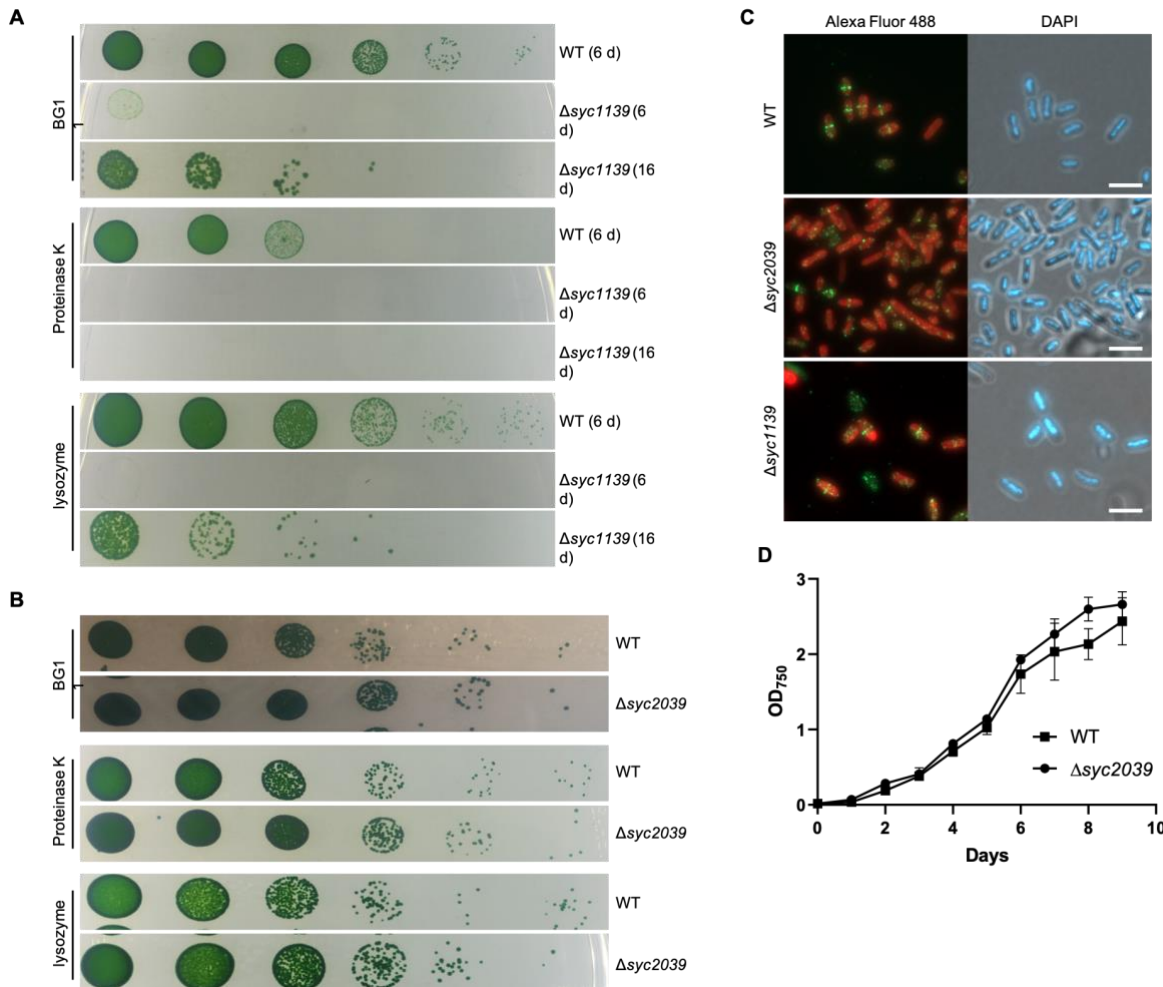

1216

1217 **Supplementary Fig. 6: Phenotypic characterization of *Synechococcus* mutant strains**

1218 (A) *Synechococcus* WT (upper lane, after 6 days) and non-segregated  $\Delta sync1139$  mutant (middle lane: after 6 days  
 1219 and lower lane after 16 days) strains were grown on BG11 plates or BG11 plates supplemented with 50  $\mu\text{g ml}^{-1}$  Km.  
 1220 Cells were resuspended in BG11, adjusted to an OD<sub>750</sub> of 0.4 and spotted in triplicates of serial 10-fold dilutions on  
 1221 BG11 plates or BG11 plates supplemented with 100  $\mu\text{g ml}^{-1}$  Lysozyme or 50  $\mu\text{g ml}^{-1}$  Proteinase K. Cells were grown  
 1222 until no further colonies arose in the highest dilution. (B) *Synechococcus* WT and  $\Delta sync2039$  mutant strains were  
 1223 grown in liquid culture at standard growth conditions until an OD<sub>750</sub> of about 2.0, diluted in BG11 to an OD<sub>750</sub> of 0.4  
 1224 and spotted in triplicates of serial 10-fold dilutions on BG11 plates or BG11 plates supplemented with 100  $\mu\text{g ml}^{-1}$   
 1225 Lysozyme or 50  $\mu\text{g ml}^{-1}$  Proteinase K. Cells were grown until no further colonies arose in the highest dilution.  
 1226 (C) Merged Alexa Fluor-488 fluorescence and chlorophyll autofluorescence (red) and merged bright field and DAPI  
 1227 fluorescence micrographs of *Synechococcus* WT,  $\Delta sync2039$  or non-segregated  $\Delta sync1139$  mutant strains grown on  
 1228 BG11 plates and subjected to immunofluorescence staining using an anti-FtsZ primary antibody (Agrisera, raised  
 1229 against *Anabaena* FtsZ) and an Alexa Fluor-488 coated secondary antibody. Cells were mounted in Prolong  
 1230 Diamond antifade mountant with DAPI (Thermo Fischer Scientific). Scale bars: 5  $\mu\text{m}$ . (D) Growth curve of  
 1231 *Synechocystis* WT and  $\Delta sync2039$  mutant strain. Cells were grown in BG11, adjusted to an OD<sub>750</sub> of 0.1 and then  
 1232 grown in triplicates at standard growth conditions. OD<sub>750</sub> values were recorded once a day for 9 d. Error bars show  
 1233 the standard deviation (n=3).



Supplementary Table 1: Properties of cyanobacterial CCRPs

| Gene /Locus tag   | Genus                | Subsection | Homologs distribution | Predicted proteins of similar structure (I-TASSER)                  | Homolog similarities | Conserved domains                                     | Others                                                     |
|-------------------|----------------------|------------|-----------------------|---------------------------------------------------------------------|----------------------|-------------------------------------------------------|------------------------------------------------------------|
| <i>crescentin</i> | <i>C. crescentus</i> | n/a        | n/a                   | Cytoplasmic domain of bacterial cell division protein EzrA          |                      | SMC, CCDC158                                          | IF-like CCRP                                               |
| <i>filP</i>       | <i>S. coelicolor</i> | n/a        | n/a                   | Dynein tail; $\alpha$ -Actinin; Tropomyosin                         |                      | DUF3552, SMC, RNase_Y                                 | IF-like CCRP                                               |
| <i>desmin</i>     | <i>Homo sapiens</i>  | n/a        | n/a                   | PI4KIIIa lipid kinase                                               |                      | Filament (pfam00038), SMC, Spc7, MscS_TM              | IF protein                                                 |
| <i>vimentin</i>   | <i>Homo sapiens</i>  | n/a        | n/a                   | PI4KIIIa lipid kinase                                               |                      | Filament (pfam00038), SMC, Spc7                       | IF protein                                                 |
| <i>syc2039</i>    | <i>Synechococcus</i> | I          | I                     | Tropomyosin                                                         |                      | SMC, MukB, CALCOCO1                                   | N-terminal TMD; only in <i>Synechococcus</i> sp.           |
| <i>syc1139</i>    | <i>Synechococcus</i> | I          | I, II, III, IV, V     | Cytoplasmic domain of bacterial cell division protein EzrA          | 39%                  | SMC, MukB, Spc7                                       | Homolog to <i>slr1301</i>                                  |
| <i>slr6096</i>    | <i>Synechocystis</i> | I          | I, III, IV            | Cytoplasmic domain of bacterial cell division protein EzrA          |                      | SMC                                                   |                                                            |
| <i>slr7083</i>    | <i>Synechocystis</i> | I          | I                     | Plectin                                                             |                      | SMC, MscS_TM                                          | Encoded on pSYSA plasmid, only in <i>Synechocystis</i> sp. |
| <i>slr1301</i>    | <i>Synechocystis</i> | I          | I, II, III, IV, V     | Cytoplasmic domain of bacterial cell division protein EzrA          | 39%                  | SMC, SbcC, APG6, DUF3552                              | Homolog to <i>syc1139</i>                                  |
| <i>tlr0420</i>    | <i>BP-1</i>          | I          | I, III                | Plectin                                                             |                      | SMC, MscS_TM                                          |                                                            |
| <i>fm7001</i>     | <i>Fischerella</i>   | V          | IV, V                 | $\alpha$ -catenin or vinculin; similarity to acyl-CoA dehydrogenase | 63%                  | Acetyl-CoA carboxylase carboxyl transferase (PLN0322) | Highly expressed; 3' end 9 bp overlap to <i>fm7000</i>     |
| <i>fm6009</i>     | <i>Fischerella</i>   | V          | V                     | Structure of $\beta$ -catenin and HTCF-4                            |                      | COG0610                                               |                                                            |
| <i>all4981</i>    | <i>Anabaena</i>      | IV         | III, IV, V            | TTC7B/Hyccin Complex, Clathrin                                      | 47%                  | TPR                                                   | 5' with a 4 bp overlap to <i>all4982</i>                   |

1235 The first column indicates the respective gene name or locus tags of each protein candidate. The second and third column indicate the respective subsection of the corresponding  
1236 cyanobacterial genus. Column four lists the subsections that contain homologous proteins to the respective CCRP. Column five indicates structural similarities of the candidate to  
1237 proteins in the Protein Data Bank (PDB) based on I-TASSER (Zhang, 2009; Yang and Zhang, 2015). The sixth column lists predicted sub-domains of protein candidates identified  
1238 by BLAST Conserved Domain Search. Column seven names other features of interest. Abbreviations: (TMH) Transmembrane helix; (DUF) Domain of unknown function; (CCDC158)  
1239 Coiled-coil domain-containing protein 158; (SMC) Structural maintenance of chromosomes; (MukB) The hinge domain of chromosome partition protein MukB; (APG6) Autophagy  
1240 protein Apg6, (SbcC) DNA repair exonuclease SbcCD ATPase; (CALCOCO1) Calcium binding and coiled-coil domain; (Spc7) Spc7 kinetochore protein; (Filament) Intermediate  
1241 filament protein; (TPR): Tetratricopeptide repeat; (PLN0322) Acetyl-CoA carboxylase carboxyl transferase; (COG0610) Type I site-specific restriction-modification system. *Anabaena*  
1242 CCRPs CypS, LfiB, CeaR, Alr4393 and All4935 (Springstein *et al.*, 2019) also revealed structural similarities to EzrA. n/a: not applicable.

1243 **Supplementary Table 2: Bacterial strains**

| Strain                                  | Genotype                                                                                                                                                                                                              | Resistance | Reference                                        |
|-----------------------------------------|-----------------------------------------------------------------------------------------------------------------------------------------------------------------------------------------------------------------------|------------|--------------------------------------------------|
| <i>E. coli</i> XL1 blue                 | <i>endA1 gyrA96(nal<sup>R</sup>) thi-1 recA1 relA1 lac glnV44 F' [::Tn10 proAB<sup>+</sup> lacI<sup>q</sup> Δ(lacZ)M15] hsdR17(rk<sup>-</sup> mk<sup>+</sup>)</i>                                                     | Tet        | Stratagene                                       |
| <i>E. coli</i> HB101                    | F <sup>-</sup> <i>mcrB mrr hsdS20(r<sub>B</sub><sup>-</sup> m<sub>B</sub><sup>-</sup>) recA13 leuB6 ara-14 proA2 lacY1 galK2 xyl-5 mtl-1 rpsL20(Sm<sup>R</sup>) glnV44 λ<sup>-</sup></i>                              | Sm         | (Boyer and Roulland-Dessoix, 1969)               |
| <i>E. coli</i> DH5α                     | F <sup>-</sup> Φ80 <i>lacZ</i> ΔM15 Δ( <i>lacZYA-argF</i> ) U169 <i>recA1 endA1 hsdR17</i> (rk <sup>-</sup> , mk <sup>+</sup> ) <i>phoA supE44 λ<sup>-</sup> thi-1 gyrA96 relA1</i>                                   |            | (Meselson and Yuan, 1968)                        |
| <i>E. coli</i> DH5αMCR                  | F <sup>-</sup> <i>endA1 supE44 thi-1 λ<sup>-</sup> recA1 gyrA96 relA1 deoR Δ(lacZYA-argF)U169 Φ80ΔlacZΔM15 mcrA Δ(mrr hsdRMS mcrBC)</i>                                                                               |            | (Grant <i>et al.</i> , 1990)                     |
| <i>E. coli</i> BL21 (DE3)               | F <sup>-</sup> <i>ompT gal dcm lon hsdS<sub>B</sub>(r<sub>B</sub><sup>-</sup> m<sub>B</sub><sup>-</sup>) λ(DE3 [<i>lacI lacUV5-T7p07 ind1 sam7 nin5</i>]) [<i>malB<sup>+</sup></i>]<sub>K-12</sub>(λ<sup>S</sup>)</i> |            | (Studier and Moffatt, 1986)s                     |
| <i>E. coli</i> BTH101                   | F <sup>-</sup> , <i>cya-99, araD139, galE15, galK16, rpsL1 (Str<sub>r</sub>), hsdR2, mcrA, mcrB1</i>                                                                                                                  | Sm         | Euromedex                                        |
| <i>Fischerella muscicola</i> PCC 7414   | WT                                                                                                                                                                                                                    |            | PCC, France                                      |
| <i>Synechocystis</i> sp. PCC 6803       | Glucose tolerant Kazusa substrain WT                                                                                                                                                                                  |            | PCC, France                                      |
| BLS4                                    | Δ <i>slr1301::CS.3</i>                                                                                                                                                                                                | Sm,Sp      | This study                                       |
| BLS5                                    | Δ <i>slr7083::CS.3</i>                                                                                                                                                                                                | Sm,Sp      | This study                                       |
| <i>Synechocystis</i> sp. PCC-M 6803     | Glucose tolerant and motile Moscow PCC-M substrain WT                                                                                                                                                                 |            | A gift from Annegret Wilde (University Freiburg) |
| BLS6                                    | Δ <i>slr1301::CS.3</i>                                                                                                                                                                                                | Sm,Sp      | This study                                       |
| BLS7                                    | Δ <i>slr7083::CS.3</i>                                                                                                                                                                                                | Sm,Sp      | This study                                       |
| <i>Synechococcus elongatus</i> PCC 7942 | WT                                                                                                                                                                                                                    |            | A gift from Martin Hagemann (University Rostock) |
| BLS8                                    | Non-segregated Δ <i>sync2039::nptII</i>                                                                                                                                                                               | Km         | This study                                       |
| BLS9                                    | Δ <i>sync2039::nptII</i>                                                                                                                                                                                              | Km         | This study                                       |
| <i>Anabaena</i> sp. PCC 7120            | WT                                                                                                                                                                                                                    |            | PCC, France                                      |

1244

1245 **Supplementary Table 3: Oligonucleotides and Plasmids**

| #  | Given name                        | Sequence 5' -> 3'        | Purpose                                 |
|----|-----------------------------------|--------------------------|-----------------------------------------|
| 1  | Fm7001_intern_A                   | AGCGGGAAGATGGCTACTATC    | RT-PCR                                  |
| 2  | 7001_northern                     | TCTGCGGCTTGACTTGATAC     | RT-PCR                                  |
| 3  | qftsZ7414_fwd                     | TGGAATAAAGCTGCCGAGG      | RT-PCR                                  |
| 4  | qftsZ7414_rev                     | CTGTACCAGTTCACCACCC      | RT-PCR                                  |
| 5  | Syn017_intern_A                   | TGCAACAGCAAACGGAACAG     | RT-PCR                                  |
| 6  | Syn017_intern_B                   | TTGGGAGCTAACTTGCCCAC     | RT-PCR                                  |
| 7  | rnpb 6803 primer fwd              | GGAGTTGCGGATTCTGTCA      | RT-PCR                                  |
| 8  | rnpb 6803 primer rev              | AAGACCAACCTTTGCCCTC      | RT-PCR                                  |
| 9  | Syn708_intern_A                   | TGGAGTGCCCTGCCTAACG      | RT-PCR                                  |
| 10 | Syn708_intern_B                   | CCCTTCTAACCTTTGTCCGGC    | RT-PCR                                  |
| 11 | Syc484_intern_A                   | CTACCATTCTTGGTGTGGCGG    | RT-PCR                                  |
| 12 | Syc484_intern_B                   | GAAATCCTGCGATCGCTGTTG    | RT-PCR                                  |
| 13 | Syc879_intern_A                   | CCTGTGACTTCTCTCCAGGG     | RT-PCR                                  |
| 14 | Syc879_intern_B                   | CTTTTAACTCGCGATCGCGGC    | RT-PCR                                  |
| 15 | Nos389_intern_A                   | ATCACCTGAATTAGCTGCGG     | RT-PCR                                  |
| 16 | Nos389_intern_B                   | CTAATAATGCCGCAATCAGCG    | RT-PCR                                  |
| 17 | All4982_intern_A                  | ATCAGATGGTGGAGGGAAGC     | RT-PCR                                  |
| 18 | All4983_intern_A                  | AGTAGCTGCATTTATCGGTGC    | RT-PCR                                  |
| 19 | pET19bmod-Fwd                     | GGAATTGTGAGCGGATAACAATT  | Sequencing of pET21a(+) inserts         |
| 20 | T7R                               | CTAATACGACTCACTATAGGGA   | Sequencing of pET21a(+) inserts         |
| 21 | pAM2991_Seq_A                     | GCGCCGACATCATAACGGTTC    | Sequencing of pAM2991 inserts           |
| 22 | pAM2991_Seq_B                     | GCTGAAAATCTTCTCTCATCCGCC | Sequencing of pAM2991 inserts           |
| 23 | pRL153_Seq_Rev                    | AGGAGATTAACCCGCCCAAG     | Sequencing of pRL153 inserts            |
| 24 | CS3_Seq_Fwd                       | CGCGCAGATCAGTTGGAAG      | Sequencing of gene replacement plasmids |
| 25 | CS3_Seq_Rev                       | AACGTCGGTTCGAGATGGC      | Sequencing of gene replacement plasmids |
| 26 | GFP_Seq_Rev                       | TTGTGCCCATTAACATCACCATC  | Sequencing of GFP containing plasmids   |
| 27 | pJET1.2 forward sequencing primer | CGACTCACTATAGGGAGAGCGGC  | Sequencing of pJET1.2 inserts           |
| 28 | pJET1.2 reverse sequencing primer | AAGAACATCGATTTTCCATGGCAG | Sequencing of pJET1.2 inserts           |
| 29 | pKO_Seq_Fwd                       | GCCTTTTTACGGTTCCTGGC     | Sequencing pTHS121                      |

|    |                      |                                                        |                                                         |
|----|----------------------|--------------------------------------------------------|---------------------------------------------------------|
| 30 | pKO_Seq_Rev          | TCTTTTCTACGGGGTCTGACG                                  | Sequencing<br>pTHS121                                   |
| 31 | pIGA_Seq_Fwd         | TGCGCATAGAAATTGCATCA                                   | Sequencing of<br>pIGA inserts                           |
| 32 | pIGA_Seq_Rev         | GTCAGCAACACCTTCTTCA                                    | Sequencing of<br>pIGA inserts                           |
| 33 | pRL271_Seq_Fwd       | GCCTGGTGCTACGCCTGAATA                                  | Sequencing of<br>pRL271 inserts                         |
| 34 | pRL271_Seq_Rev       | CCAGTTAATAGTTTGCGCAACGTTG                              | Sequencing of<br>pRL271 inserts                         |
| 35 | pRL278_Seq_Fwd       | GGGGCGTAATTTTTTTAAGGCAGTTATTG                          | Sequencing of<br>pRL278 inserts                         |
| 36 | pSL2680_Seq_A        | CAAGAGGGCAAAAACTCAATTTG                                | Sequencing of<br>pSL2680 inserts                        |
| 37 | cpf1_1A              | TTGGTCATGAGATTATCAAAAAGGATCCT<br>GGAAAACGTTCTTCGGGGC   | Amplification of<br><i>cpf1</i> for pTHS123             |
| 38 | pRL25c_CRISPR_2<br>B | AGGCCCTTTCGTCTTCAAGAATTCTTTAC<br>ACTGATGAATGTTCCGTTGCG | Amplification of<br><i>cpf1</i> for pTHS123             |
| 39 | cpf1-1               | CTCCAGAAGCTATAAACTATGAAC                               | Sequencing of<br><i>cpf1</i>                            |
| 40 | cpf1-2               | CTACTTCAAGCTAGTGCGGAA                                  | Sequencing of<br><i>cpf1</i>                            |
| 41 | cpf1-3               | GTTGAAAATCAAGGCTACAACTAAC                              | Sequencing of<br><i>cpf1</i>                            |
| 42 | cpf1-4               | CGTTTCAAGGTAGAGAAGCAGG                                 | Sequencing of<br><i>cpf1</i>                            |
| 43 | pRL25c_Seq_Fwd       | CTTTGATCTTTTCTACGGGGTCT                                | Sequencing of<br>pRL25C inserts                         |
| 44 | pRL25c_Seq_Rev       | TTGAGGTGAGGGATGAGCG                                    | Sequencing of<br>pRL25C inserts                         |
| 45 | pMAL_Seq_Fwd         | AGAAAGGTGAAATCATGCCG                                   | Sequencing of<br>pMAL-c2x inserts                       |
| 46 | pMAL_Seq_Rev         | CTGCAAGGCGATTAAGTTGG                                   | Sequencing of<br>pMAL-c2x inserts                       |
| 47 | MB_Seq_A             | GGCTCGTATGTTGTGTGG                                     | Sequencing of<br>pKNT25, pKT25<br>and pUT18<br>inserts  |
| 48 | MB_Seq_B             | GGCTTAACTATGCGGCATC                                    | Sequencing of<br>pKNT25, pUT18<br>and pUT18C<br>inserts |
| 49 | MB_Seq_C             | TAACGCCAGGGTTTTCCCA                                    | Sequencing of<br>pKT25 inserts                          |
| 50 | pKNT25_Seq_Rev       | CGTTTGCCTAACCAGCC                                      | Sequencing of<br>pKNT25 inserts                         |
| 51 | pKT25_Seq_Fwd        | GATTCGGTGACCGATTACCTG                                  | Sequencing of<br>pKT25 inserts                          |
| 52 | pUT18_Seq_Rev        | GATGCGTTCGCGATCCAG                                     | Sequencing of<br>pUT18 inserts                          |

|    |                |                                                       |                                                                    |
|----|----------------|-------------------------------------------------------|--------------------------------------------------------------------|
| 53 | pUT18C_Seq_Fwd | TCGCCGGATGTACTIONGAAAC                                | Sequencing of pUT18C inserts                                       |
| 54 | N-term_1A      | GAGGATCCCCGGGTACC                                     | Amplification of pKNT25 and pUT18                                  |
| 55 | N-term_1B      | TAGAGTCGACCTGCAGGCA                                   | Amplification of pKNT25 and pUT18                                  |
| 56 | pKT25_1A       | CCCCGGGTACCTAAGTAAGTAAG                               | Amplification of pKT25                                             |
| 57 | pKT25_1B       | ATCCTCTAGAGTCGACCCTGC                                 | Amplification of pKT25                                             |
| 58 | pUT18C_1A      | CCGAGCTCGAATTCATCGAT                                  | Amplification of pUT18C                                            |
| 59 | pUT18C_1B      | TACCCGGGGATCCTCTAGAGT                                 | Amplification of pUT18C                                            |
| 60 | pET21a_1A      | CACCACCACCACCACCAC                                    | Amplification of pET21a(+) for gfp fusions                         |
| 61 | pET21a_1B      | ATGTATATCTCCTTCTTAAAGTTAAACAAA<br>ATTATTTCTAGAGG      | Amplification of pET21a(+) for gfp fusions                         |
| 62 | pRL271_Fwd     | GAGCTCGCGAAAGCTTGCATG                                 | Amplification of pRL271 and pRL278                                 |
| 63 | pRL271_Rev     | CTCGAGATCTAGATATCGAATTTCTGCCA<br>T                    | Amplification of pRL271                                            |
| 64 | pRL278_Rev     | CCGCTTATTATCACTTATTCAGGCG                             | Amplification of pRL278                                            |
| 65 | pETM22_Vec_R   | ATGTTTTTCGTATTTTCCCTACCAGAAGAA<br>TGATGATGATGATGG     | Amplification of pETM22                                            |
| 66 | pETM22_Vec_F   | TGGATGAACTATACAAATAAATCCGGCTG<br>CTAACAAAGC           | Amplification of pETM22                                            |
| 67 | Vector.FOR     | TGATGTTCAACTTCGACAGCGAATTCCTC<br>GACCTGCAGGG          | Amplification of pIGA                                              |
| 68 | Vector.REV     | AGGGACTCTTCTCTACAGGTGGTACCCC<br>GGGTTCCGAAATCG        | Amplification of pIGA                                              |
| 69 | YFP_pcp560_2A  | CATAAAGTCAAGTAGGAGATTAATTCAAT<br>GCTGAGCAAGGGCGA      | Amplification of YFP with overhang to P <sub>cp560</sub>           |
| 70 | YFP_2A         | TACAGGTTAGGAGAACGCCATGCTGAGC<br>AAGGGCG               | Amplification of YFP                                               |
| 71 | YFP-Myc_2B     | CAGATCCTCTTCAGAGATGAGTTTCTGCT<br>CCTTGACAGCTCGTCCATGC | Amplification of YFP with C-terminal <i>myc</i>                    |
| 72 | Myc+Linker_2B  | TCCTGAACCCGATCCAGAGCCCAGATCC<br>TCTTCAGAGATGAGTTTC    | Amplification of YFP with C-terminal <i>myc</i> and a GSGSG linker |



|     |                  |                                                          |                                                                                     |
|-----|------------------|----------------------------------------------------------|-------------------------------------------------------------------------------------|
| 96  | Fragment 4.FOR   | TGGATGAACTATACAAATAAACCGGTGTT<br>TGGATTGTCGG             | T <sub>rbcl</sub> for pTHS60                                                        |
| 97  | Fragment 4.REV   | CCCTGCAGGTCGAGGAATTCGCTGTCTCGA<br>AGTTGAACATCAGTAAGC     | T <sub>rbcl</sub> for pTHS60                                                        |
| 98  | TrbcL_A          | ACCGGTGTTTGGATTGTCGG                                     | Amplification of pIGA containing P <sub>cp560</sub> and T <sub>rbcl</sub> for pTH76 |
| 99  | pIGA_Pcp560_1B   | TGAATTAATCTCCTACTTGACTTTATGAGT<br>TGGG                   | Amplification of pIGA containing P <sub>cp560</sub> and T <sub>rbcl</sub> for pTH76 |
| 100 | YFP_pcpc560_2A   | CATAAAGTCAAGTAGGAGATTAATTCAAT<br>GCTGAGCAAGGGCGA         | <i>yfp-fm7001</i> for pTHS76                                                        |
| 101 | 7001_TrbcL_2B    | CCGACAATCCAAACACCGGTTTCAGACTAA<br>GGCAGTCATTAATAGTGAAG   | <i>yfp-fm7001</i> for pTHS76                                                        |
| 102 | 7001F_BamHI      | ACTGGATCCAGGGAAAATACGAAAAACAT<br>TGGA                    | <i>fm7001</i> for pTHS63                                                            |
| 103 | 7001R_NotI       | AGCGGCCGCTCAGACTAAGGCAGTCATT<br>AAATAGTG                 | <i>fm7001</i> for pTHS63                                                            |
| 104 | 7001F_BamHI      | GGATCCTATGAGGGAAAATACGAAAAAC                             | <i>fm7001</i> for pTHS95, pTHS96, pTHS97 and pTHS98                                 |
| 105 | 7001R_EcoRI      | AGCGAATTCTCAGACTAAGGCAGTCAT                              | <i>fm7001</i> for pTHS96 and pTHS98                                                 |
| 106 | 7001R_SacI       | GAGCTCCTGACTAAGGCAGTCATTA                                | <i>fm7001</i> for pTHS95 and pTHS97                                                 |
| 107 | 7120petER_7001ol | GTATTTTCCCTCATACCTGTAGTTTTATTT<br>TTCTTATTTT             | <i>petE</i> for pTHS83 (overlap PCR)                                                |
| 108 | 7001F_petEol     | AAACTACAGGTATGAGGGAAAATACGAA<br>AAAC                     | <i>fm7001</i> for pTHS83 (overlap PCR)                                              |
| 109 | 7001R_SacI_C     | AGCGAGCTCTAAGGCAGTCATTAATAGT<br>G                        | <i>fm7001</i> for pTHS83                                                            |
| 110 | 7001F_NheI       | AACTGCTAGCAGGGAAAATACGAAAAAC                             | <i>fm7001</i> for pTHS83                                                            |
| 111 | 7001_3A          | CTCTGGATCGGGTTTCAGGAATGAGGGAA<br>AATACGAAAAACATTGG       | <i>fm7001</i> for pTHS84                                                            |
| 112 | 7001_3B          | CCTTTCGTCTTCAAGAATTCTTCAGACTAA<br>GGCAGTCATTAATAGTG      | <i>fm7001</i> for pTHS84                                                            |
| 113 | pRL271_7up_F     | AGAAATTCGATATCTAGATCTCGAGAGCA<br>ATGTGAGTGAGTTCGTGAGC    | Upstream homology for pTHS126                                                       |
| 114 | 7001KO_1B        | GTGCTTGCGGCAGCGTGAAGCTTGGGGT<br>TATCCTTAATAGAAGAAGAGTGC  | Upstream homology for pTHS126                                                       |
| 115 | 7001KO_2A        | CGCCTTCTTGACGAGTTCTTCTGAATCAA<br>GAGCATTCTTGATTTCTGTCTCA | Downstream homology for pTHS126                                                     |



|     |                        |                                                             |                                                                                          |
|-----|------------------------|-------------------------------------------------------------|------------------------------------------------------------------------------------------|
| 116 | pRL271_7down_R         | CAGGCATGCAAGCTTTCGCGAGCTCTGC<br>TACCAAGACGATGCGTTTCATGTC    | Downstream<br>homology for<br>pTHS126                                                    |
| 117 | 7001KO_2A2             | AATTCGATATCTAGATCTCGAGTTGCGTT<br>TCAAAACACTACAAATTAGTACAAAC | Upstream<br>homology for<br>pTHS127                                                      |
| 118 | 7001KO_2B2             | AAGGTGCTGTGCACGGATCGGGGTTATC<br>CTTAATAGAAGAAGAGTGC         | Upstream<br>homology for<br>pTHS127                                                      |
| 119 | 7001KO_4A2             | CAAGGTAGTCGGCAAATAAATCAAGAGCA<br>TTCTTGATTCTGTCTC           | Downstream<br>homology for<br>pTHS127                                                    |
| 120 | 7001KO_4B2             | TGCAAGCTTTCGCGAGCTCCTGAAGACA<br>AAGATGAAGTTTCGATATTACC      | Downstream<br>homology for<br>pTHS127                                                    |
| 121 | trunc7001_2A           | CTGAATAAGTGATAATAAGCGGTTGCGTT<br>TCAAAACACTACAAATTAGTACAAA  | Truncated <i>fm7001</i><br>for pTHS128                                                   |
| 122 | trunc7001_2B           | TGCAAGCTTTCGCGAGCTCGTATTGATAC<br>TGGGTTGAGAATACTGC          | Truncated <i>fm7001</i><br>for pTHS128                                                   |
| 123 | 7001_gRNA_A            | AGATGAGTTTTGCACAAAGTTGGA                                    | <i>fm7001</i> gRNA for<br>pTHS121 and<br>pTHS123                                         |
| 124 | 7001_gRNA_B            | AGACTCCAACCTTTGTGCAAAACTC                                   | <i>fm7001</i> gRNA for<br>pTHS121 and<br>pTHS123                                         |
| 125 | Fm7001_HL1A            | TTGTCTAGCTTTAATGCGGTAGTTGGTAC<br>CAGGAACATCGCGTCTCTACC      | Downstream<br>homology repair<br>template for<br>pTHS121 and<br>pTHS123                  |
| 126 | Fm7001_HL1B            | AAGAATGCTCTTGATGGGTTATCCTTAA<br>TAGAAGAAGAGTGC              | Upstream<br>homology repair<br>template for<br>pTHS121 and<br>pTHS123                    |
| 127 | Fm7001_HL2A            | TATTAAGGATAACCCCATCAAGAGCATT<br>TTGATTTCTGTCTC              | Upstream<br>homology repair<br>template for<br>pTHS121 and<br>pTHS123                    |
| 128 | Fm7001_HL2B            | GATTACAGATCCTCTAGAGTCGACGGTAC<br>CTAAGGCAGCAACGTTTTCCG      | Downstream<br>homology repair<br>template for<br>pTHS121 and<br>pTHS123                  |
| 129 | Syn017_NdeI_fwd        | GCTACATATGACAAGTCAAATTTTGTTC<br>TGAT                        | <i>slr7083</i> for<br>pTHS61                                                             |
| 130 | Syn017_XhoI_wo_re<br>v | GCTACTCGAGTGGTAAATAAGGGGGAGT<br>GG                          | <i>slr7083</i> for<br>pTHS61                                                             |
| 131 | pIGA_V_017_R           | ACAAAATTTTGACTTGTCATTGAATTAATC<br>TCCTACTTGACTTTATGAGTTGG   | Amplification of<br>pIGA with P <sub>cpc560</sub><br>and T <sub>rbCL</sub> for<br>pTHS77 |



|     |                        |                                                              |                                       |
|-----|------------------------|--------------------------------------------------------------|---------------------------------------|
| 153 | Syc484_KO_2B           | CTTGCGGCAGCGTGAAGCTTAGCAAAGC<br>AAAAGAAGCGATCG               | Upstream<br>homology for<br>pTHS119   |
| 154 | Syc484_KO_4A           | TTCTTGACGAGTTCTTCTGATTCTGCTGC<br>GATGCGTTAGG                 | Downstream<br>homology for<br>pTHS119 |
| 155 | Syc484_KO_4B           | CTCGAGTTTTTCAGCAAGATCAAGTAAGA<br>CTGGCTGCCATG                | Downstream<br>homology for<br>pTHS119 |
| 156 | Syc484_Seq_A           | GATGCCACCGAGCAGAATTAG                                        | Verification of<br>$\Delta$ syc2039   |
| 157 | Syc484_Seq_B           | GGCAGATCAATCAGCAGCTC                                         | Verification of<br>$\Delta$ syc2039   |
| 158 | Syc879_pET_2A          | GTTTAACTTTAAGAAGGAGATATACATAT<br>GCTCTATCTGGCTGAAGTCG        | <i>syc1139</i> for<br>pTHS66          |
| 159 | Syc879_pET_2B          | CAGTGGTGGTGGTGGTGGTGGGCTGCAA<br>TCAGTTGATGACT                | <i>syc1139</i> for<br>pTHS66          |
| 160 | Syc879_pIGA_2A         | TAAAGTCAAGTAGGAGATTAATTCAGTGC<br>TCTATCTGGCTGAAAGTCGG        | <i>syc1139</i> for<br>pTHS81          |
| 161 | Syc879_2A              | TACAGGTTAGGAGAACGCCATGCTCTATC<br>TGGCTGAAGTCG                | <i>syc1139</i> for<br>pTHS93          |
| 162 | Syc879_2B              | CACTAGCAGATGCACTAGCGGCTGCAAT<br>CAGTTGATGACTG                | <i>syc1139</i> for<br>pTHS93          |
| 163 | Syc879_pAM2991_2<br>A  | CACACAGGAAACAGACCATGCTCTATCTG<br>GCTGAAGTCGG                 | <i>syc1139</i> for<br>pTHS74          |
| 164 | Syc879_KO_2A           | TGTAGGAGATCTTCTAGAAAGATCTGGAG<br>CGATCGCTATGG                | Upstream<br>homology for<br>pTHS133   |
| 165 | Syc879_KO_2B           | CTTGCGGCAGCGTGAAGCTTTATCGATG<br>CCTCGCCTTAATCAATC            | Upstream<br>homology for<br>pTHS133   |
| 166 | Syc879_KO_4A           | CCTTCTTGACGAGTTCTTCTGAGCCAGTC<br>CCCCGCGACTA                 | Downstream<br>homology for<br>pTHS133 |
| 167 | Syc879_KO_4B           | CTCGAGTTTTTCAGCAAGATGGCAAGCG<br>CAACTGAATTCTTAC              | Downstream<br>homology for<br>pTHS133 |
| 168 | Syn708_NdeI_F          | GCTACATATGCTCTATCTGGCTGAAATTA<br>AGAAA                       | <i>slr1301</i> for<br>pTHS65          |
| 169 | Syn708_XhoI_R_w/o<br>C | GCTACTCGAGACCGCCAAACAATAGGGT<br>C                            | <i>slr1301</i> for<br>pTHS65          |
| 170 | Syn708_pET_2A          | GTTTAACTTTAAGAAGGAGATATACATAT<br>GCTCTATCTGGCTGAAATTAAGAAAC  | <i>slr1301</i> for<br>pTHS67          |
| 171 | Syn708_pRL25c_Fw<br>d  | TAAACTACAGGTTAGGAGAACGCCATGC<br>TCTATCTGGCTGAAATTAAGAAACAAAC | <i>slr1301</i> for<br>pTHS91          |
| 172 | Syn708_pRL25c_Rev      | CACTAGCACTAGCAGATGCACTAGCACC<br>GCCAAACAATAGGGTCT            | <i>slr1301</i> for<br>pTHS91          |
| 173 | Syn708_3A              | CTCTGGATCGGGTTCAGGAGTGCTCTAT<br>CTGGCTGAAATTAAG              | <i>slr1301</i> for<br>pTHS92          |
| 174 | Syn708_3B              | CCTTTCGTCTTCAAGAATTCTCTAACCGC<br>CAAACAATAGGGTC              | <i>slr1301</i> for<br>pTHS92          |

|     |                  |                                                                      |                                       |
|-----|------------------|----------------------------------------------------------------------|---------------------------------------|
| 175 | 153Syn708_2A     | AGAATTAAGAGGAGAAATTAAGCATGCT<br>CTATCTGGCTGAAATTAAGAAAC              | <i>slr1301</i> for<br>pTHS82          |
| 176 | 153Syn708_2B     | TCAGAGATGAGTTTCTGCTCACCGCCAAA<br>CAATAGGGTC                          | <i>slr1301</i> for<br>pTHS82          |
| 177 | pJET708_2A       | TGTAGGAGATCTTCTAGAAAGATAATAGA<br>CTGCAATGTCAAAAACTCAG                | Upstream<br>homology for<br>pTHS131   |
| 178 | 708KO_CS3_2B     | CAAGGTGCTGTGCACGGATCAAGTCGTT<br>GTCCTGAGCAG                          | Upstream<br>homology for<br>pTHS131   |
| 179 | 708KO_CS3_4A     | CCAAGGTAGTCGGCAAATAATTGGGTTG<br>GTTGCCGAC                            | Downstream<br>homology for<br>pTHS131 |
| 180 | pJET708_4B       | CTCGAGTTTTTTCAGCAAGATTTAGCAAGG<br>TGGGGGGAATG                        | Downstream<br>homology for<br>pTHS131 |
| 181 | 708KO_1Aa        | CCTGATTCTGTGGATAACCGTACGTCAA<br>ATCGAATCCCGGTC                       | Upstream<br>homology for<br>pTHS132   |
| 182 | 708KO_1B         | TGCTTGCAGCAGCGTGAAGCTTAAGTCG<br>TTGTCTGAGCAGTG                       | Upstream<br>homology for<br>pTHS132   |
| 183 | 708KO_2A         | CGCCTTCTTGACGAGTTCTTCTGATTGGG<br>TTGGTTGCCGACTTC                     | Downstream<br>homology for<br>pTHS132 |
| 184 | 708KO_2B         | GATTATCAAAAAGGATCTTCACCTTTAGC<br>AAGGTGGGGGGAATGC                    | Downstream<br>homology for<br>pTHS132 |
| 185 | Nos389_pET_2A    | GTTTAACTTTAAGAAGGAGATATACATAT<br>GAATAGTGAGTTGTTCCAGAAGC             | <i>all4981</i> for<br>pTHS72          |
| 186 | Nos389_NdeI_F    | GCTACATATGAATAGTGAGTTGTTCCAGA<br>AG                                  | <i>all4981</i> for<br>pTHS64          |
| 187 | Nos389_XhoI_wo_R | GCTACTCGAGGATGTTACTATCACTACTT<br>TGAATTTTT                           | <i>all4981</i> for<br>pTHS64          |
| 188 | Nos389_2A        | CTACAGTTAGGAGAACGCCATGAATAGT<br>GAGTTGTTCCAGAAGCTAGC                 | <i>all4981</i> for<br>pTHS89          |
| 189 | Nos389_2B        | GCACTAGCAGATGCACTAGCGATGTTACT<br>ATCACTACTTTGAATTTTTTTGAGTTTGCC      | <i>all4981</i> for<br>pTHS89          |
| 190 | Nos389_3A        | CTCTGGATCGGGTTCAGGAATGAATAGT<br>GAGTTGTTCCAGAAGC                     | <i>all4981</i> for<br>pTHS88          |
| 191 | Nos389_3B        | CCTTTCGTCTTCAAGAATCTTTAGATGTT<br>ACTATCACTACTTTGAATTTTTTTGAG         | <i>all4981</i> for<br>pTHS88          |
| 192 | Nos389_pIGA_2A   | TAAAGTCAAGTAGGAGATTAATTCAATGA<br>ATAGTGAGTTGTTCCAGAAGC               | <i>all4981</i> for<br>pTHS79          |
| 193 | Nos389_TrbcL_2B  | CCGACAATCCAAACACCGTTTTAGATGTT<br>ACTATCACTACTTTGAATTTTTTTGAGTTT<br>G | <i>all4981</i> for<br>pTHS78          |
| 194 | 389KO_2A         | ATTCGATATCTAGATCTCGAGTGTCAGAT<br>TTAGTACTTTAAATACAAGACTTACACAC       | Upstream<br>homology for<br>pTHS129   |

|     |               |                                                           |                                                      |
|-----|---------------|-----------------------------------------------------------|------------------------------------------------------|
| 195 | 389KO_2B      | CAAGGTGCTGTGCACGGATCAGCTGTTC<br>GCTCTTGAGGG               | Upstream<br>homology for<br>pTHS129                  |
| 196 | 389KO_4A      | CCAAGGTAGTCGGCAAATAAAGTAACGC<br>GATGTGCGACT               | Downstream<br>homology for<br>pTHS129                |
| 197 | 389KO_4B      | ATGCAAGCTTTCGCGAGCTCGATTAATAC<br>CTTTGGTGTTTCATGACACTGG   | Downstream<br>homology for<br>pTHS129                |
| 198 | trunc389_2A   | CTGAATAAGTGATAATAAGCGGAAGCCAT<br>TTTAGATCGAGAGGCG         | Truncated <i>all4981</i><br>for pTHS130              |
| 199 | trunc389_2B   | TGCAAGCTTTCGCGAGCTCGCTAAATTCC<br>AAAACACTACTGCCTT         | Truncated <i>all4981</i><br>for pTHS130              |
| 200 | Nos389_gRNA-A | AGATCAGAAGCTAGCAAAAAGCACA                                 | <i>all4981</i> gRNA for<br>pTHS124 and<br>pTHS125    |
| 201 | Nos389_gRNA-B | AGACTGTGCTTTTGCTAGCTTCTG                                  | <i>all4981</i> gRNA for<br>pTHS124 and<br>pTHS125    |
| 202 | Nos389_HL1A   | TTTGTCTAGCTTTAATGCGGTAGTTGGTA<br>CCGTGTGGGGTAATTTGCGGG    | Upstream<br>homology for<br>pTHS124 and<br>pTHS125   |
| 203 | Nos389_HL1B   | ATAAGTCGCACATCGCGTTACTTCATAGC<br>TGTTTCGCTCTTGAGG         | Upstream<br>homology for<br>pTHS124 and<br>pTHS125   |
| 204 | Nos389_HR2A   | CCTCAAGAGCGAACAGCTATGAAGTAAC<br>GCGATGTGCGACTTATTC        | Downstream<br>homology for<br>pTHS124 and<br>pTHS125 |
| 205 | Nos389_HR2B   | GGATTACAGATCCTCTAGAGTCGACGGTA<br>CCGGACACCACCAGCCATTTTC   | Downstream<br>homology for<br>pTHS124 and<br>pTHS125 |
| 206 | MB_1A         | TGCCTGCAGGTCGACTCTAATGAATAGTG<br>AGTTGTTCCAGAAGC          | <i>all4981</i> for<br>pTHS107 and<br>pTHS109         |
| 207 | MB_1B         | TCGGTACCCGGGGATCCTCGATGTTACT<br>ATCACTACTTTGAATTTTTTTGAGT | <i>All4981</i> for<br>pTHS107 and<br>pTHS109         |
| 208 | MB_2A         | AGGGTCGACTCTAGAGGATATGAATAGT<br>GAGTTGTTCCAGAAGC          | <i>all4981</i> for<br>pTHS108                        |
| 209 | MB_2B         | CTTACTTAGGTACCCGGGGATGTTACTA<br>TCACTACTTTGAATTTTTTTGAGT  | <i>all4981</i> for<br>pTHS108                        |
| 210 | MB_4A         | TCTAGAGGATCCCCGGGTAATGAATAGT<br>GAGTTGTTCCAGAAGC          | <i>all4981</i> for<br>pTHS110                        |
| 211 | MB_4B         | TCGATGAATTCGAGCTCGGGATGTTACTA<br>TCACTACTTTGAATTTTTTTGAGT | <i>all4981</i> for<br>pTHS110                        |
| 212 | MB_9A         | TGCCTGCAGGTCGACTCTAATGCTCTATC<br>TGGCTGAAATTAAGAAAC       | <i>slr1301</i> for<br>pTHS111 and<br>pTHS113         |

|     |        |                                                       |                                              |
|-----|--------|-------------------------------------------------------|----------------------------------------------|
| 213 | MB_9B  | TCGGTACCCGGGGATCCTCACCGCCAAA<br>CAATAGGGT             | <i>slr1301</i> for<br>pTHS111 and<br>pTHS113 |
| 214 | MB_10A | AGGGTCTGACTCTAGAGGATATGCTCTATC<br>TGGCTGAAATTAAGAAAC  | <i>slr1301</i> for<br>pTHS112                |
| 215 | MB_10B | CTTACTTAGGTACCCGGGGACCGCCAAA<br>CAATAGGGTC            | <i>slr1301</i> for<br>pTHS112                |
| 216 | MB_12A | TCTAGAGGATCCCCGGGTAATGCTCTATC<br>TGGCTGAAATTAAGAAAC   | <i>slr1301</i> for<br>pTHS114                |
| 217 | MB_12B | TCGATGAATTCGAGCTCGGACCGCCAAA<br>CAATAGGGTC            | <i>slr1301</i> for<br>pTHS114                |
| 218 | MB_13A | TGCCTGCAGGTCGACTCTAATGACAAGTC<br>AAAATTTTGTCTGATCAAG  | <i>slr7083</i> for<br>pTHS99 and<br>pTHS101  |
| 219 | MB_13B | TCGGTACCCGGGGATCCTCTGGTAAATA<br>AGGGGGAGTGGGAC        | <i>slr7083</i> for<br>pTHS99 and<br>pTHS101  |
| 220 | MB_14A | AGGGTCTGACTCTAGAGGATATGACAAGT<br>CAAAATTTTGTCTGATCAAG | <i>slr7083</i> for<br>pTHS100                |
| 221 | MB_14B | CTTACTTAGGTACCCGGGGTGGTAAATAA<br>GGGGGAGTGGGAC        | <i>slr7083</i> for<br>pTHS100                |
| 222 | MB_16A | TCTAGAGGATCCCCGGGTAATGACAAGT<br>CAAAATTTTGTCTGATCAAG  | <i>slr7083</i> for<br>pTHS102                |
| 223 | MB_16B | TCGATGAATTCGAGCTCGGTGGTAAATAA<br>GGGGGAGTGGGAC        | <i>slr7083</i> for<br>pTHS102                |
| 224 | MB_33A | TGCCTGCAGGTCGACTCTAATGCTCTATC<br>TGGCTGAAGTCG         | <i>syc1139</i> for<br>pTHS115 and<br>pTHS117 |
| 225 | MB_33B | TCGGTACCCGGGGATCCTCGGCTGCAAT<br>CAGTTGATGACT          | <i>syc1139</i> for<br>pTHS115 and<br>pTHS117 |
| 226 | MB_34A | AGGGTCTGACTCTAGAGGATATGCTCTATC<br>TGGCTGAAGTCG        | <i>syc1139</i> for<br>pTHS116                |
| 227 | MB_34B | CTTACTTAGGTACCCGGGGGCTGCAAT<br>CAGTTGATGACT           | <i>syc1139</i> for<br>pTHS116                |
| 228 | MB_36A | TCTAGAGGATCCCCGGGTAATGCTCTATC<br>TGGCTGAAGTCG         | <i>syc1139</i> for<br>pTHS118                |
| 229 | MB_36B | TCGATGAATTCGAGCTCGGGGCTGCAAT<br>CAGTTGATGACT          | <i>syc1139</i> for<br>pTHS118                |
| 230 | MB_45A | TGCCTGCAGGTCGACTCTAATGAACTACG<br>CTCTTACCCAAG         | <i>syc2039</i> for<br>pTHS103 and<br>pTHS105 |
| 231 | MB_45B | TCGGTACCCGGGGATCCTCAGACCCTAA<br>CCAGCGGC              | <i>syc2039</i> for<br>pTHS103 and<br>pTHS105 |
| 232 | MB_46A | AGGGTCTGACTCTAGAGGATATGAACTAC<br>GCTCTTACCCAAG        | <i>syc2039</i> for<br>pTHS104                |
| 233 | MB_46B | CTTACTTAGGTACCCGGGGAGACCCTAA<br>CCAGCGGC              | <i>syc2039</i> for<br>pTHS104                |
| 234 | MB_48A | TCTAGAGGATCCCCGGGTAATGAACTAC<br>GCTCTTACCCAAG         | <i>syc2039</i> for<br>pTHS106                |

|     |              |                                          |                                            |
|-----|--------------|------------------------------------------|--------------------------------------------|
| 235 | MB_48B       | TCGATGAATTCGAGCTCGGAGACCCTAA<br>CCAGCGGC | <i>syc2039</i> for<br>pTHS106              |
| 236 | 708_Seq_A    | CCAACAAACTACCTACCACCAGTC                 | Verification of<br>$\Delta$ <i>slr1301</i> |
| 237 | 708_Seq_B    | CCGTAGGGATGCCTGATAAACCC                  | Verification of<br>$\Delta$ <i>slr1301</i> |
| 238 | Syc879_Seq_A | CATCAGGAATGGATGCAGGAGG                   | Verification of<br>$\Delta$ <i>syc1139</i> |
| 239 | Syc879_Seq_B | GGCCGCTAATCACTTTTCAGTG                   | Verification of<br>$\Delta$ <i>syc1139</i> |

| Plasmids            | Description                                                                                                                | Resistance | Reference                                                                              |
|---------------------|----------------------------------------------------------------------------------------------------------------------------|------------|----------------------------------------------------------------------------------------|
| pJET1.2/<br>blunt   | <i>E. coli</i> subcloning vector                                                                                           | Amp        | Thermo Fischer<br>Scientific                                                           |
| pMAL-c2x            | Bacterial vector for expressing N-terminal MBP-tagged proteins in <i>E. coli</i> with a Factor Xa cleavage site            | Amp        | A gift from Axel Scheidig (University of Kiel)                                         |
| pet21a(+)           | Bacterial vector for expressing C-terminal 6His-tagged proteins in <i>E. coli</i>                                          | Amp        | Novagen                                                                                |
| pRL25C              | Shuttle cosmid vector for cyanobacteria and <i>E. coli</i>                                                                 | Km, Nm     | (Wolk <i>et al.</i> , 1988)                                                            |
| pRL623              | Methylation plasmid                                                                                                        | Cm         | (Wolk <i>et al.</i> , 1988)                                                            |
| pRL443              | Conjugation plasmid                                                                                                        | Amp        | (Wolk <i>et al.</i> , 1988)                                                            |
| pRL271              | <i>sacB</i> containing plasmid to select for double homologous recombination in <i>Anabaena</i>                            | Cm         | (Cai and Wolk, 1990)                                                                   |
| pRL278              | <i>sacB</i> containing plasmid to select for double homologous recombination in <i>Anabaena</i>                            | Km, Nm     | (Cai and Wolk, 1990)                                                                   |
| pSL2680             | Cpf1-mediated CRISPR editing plasmid                                                                                       | Km, Nm     | (Ungerer and Pakrasi, 2016)                                                            |
| pRL25c-<br>CRISPR   | Functional CRISPR cassette from pSL2680 transferred into EcoRI and BamHI digested pRL25c by GIBSON assembly                | Km, Nm     | This work                                                                              |
| pSM2-<br>Pcpc560ter | pMD18-T derivate for insertion into <i>pta</i> , containing P <sub>cpc560::ter::T<sub>rbcL</sub></sub> expression cassette | Km, Amp    | A gift from Yin Li (Chinese Academy of Science). (Zhou <i>et al.</i> , 2014)           |
| pIGA                | Cyanobacterial vector for insertion into neutral locus (RS1 and RS2) of <i>slr0168</i> in <i>Synechocystis</i>             | Amp, Km    | A gift from Martin Hagemann (University Rostock), (Kunert, Hagemann and Erdmann, 2000) |
| pRL153-GFP          | Mobilizable broad host range vector, P <sub>trc</sub> - <i>gfp</i>                                                         | Km, Nm     | (Tolonen, Liszt and Hess, 2006)                                                        |

|                    |                                                                                                                                               |         |                                                    |
|--------------------|-----------------------------------------------------------------------------------------------------------------------------------------------|---------|----------------------------------------------------|
| pKNT25             | P <sub>lac</sub> ::-T25                                                                                                                       | Km      | Euromedex                                          |
| pKT25              | P <sub>lac</sub> ::T25-                                                                                                                       | Km      | Euromedex                                          |
| pUT18              | P <sub>lac</sub> ::-T18                                                                                                                       | Amp     | Euromedex                                          |
| pUT18C             | P <sub>lac</sub> ::T18-                                                                                                                       | Amp     | Euromedex                                          |
| pKT25- <i>zip</i>  | pKT25; P <sub>lac</sub> ::T25- <i>zip</i>                                                                                                     | Km      | Euromedex                                          |
| pUT18C- <i>zip</i> | pUT18C, P <sub>lac</sub> ::T18- <i>zip</i>                                                                                                    | Amp     | Euromedex                                          |
| pAM2991            | Cyanobacterial vector for expression of proteins under the control of P <sub>trc</sub> that inserts into the NS1 site of <i>Synechococcus</i> | Sm, Sp  | A gift from Susan Golden (Addgene plasmid # 40248) |
| pTHS1              | pRL25C, P <sub>petE</sub> :: <i>alr4504-gfp</i>                                                                                               | Km, Nm  | (Springstein <i>et al.</i> , 2019)                 |
| pTHS33             | pKNT25, P <sub>lac</sub> :: <i>sepJ-T25</i>                                                                                                   | Km, Nm  | (Springstein <i>et al.</i> , 2019)                 |
| pTHS34             | pKT25, P <sub>lac</sub> ::T25- <i>sepJ</i>                                                                                                    | Km, Nm  | (Springstein <i>et al.</i> , 2019)                 |
| pTHS35             | pUT18, P <sub>lac</sub> :: <i>sepJ-T18</i>                                                                                                    | Amp     | (Springstein <i>et al.</i> , 2019)                 |
| pTHS36             | pUT18C, P <sub>lac</sub> ::T18- <i>sepJ</i>                                                                                                   | Amp     | (Springstein <i>et al.</i> , 2019)                 |
| pTHS37             | pKNT25, P <sub>lac</sub> :: <i>ftsZ-T25</i>                                                                                                   | Km, Nm  | (Springstein <i>et al.</i> , 2019)                 |
| pTHS38             | pKT25, P <sub>lac</sub> ::T25- <i>ftsZ</i>                                                                                                    | Km, Nm  | (Springstein <i>et al.</i> , 2019)                 |
| pTHS39             | pUT18, P <sub>lac</sub> :: <i>ftsZ-T18</i>                                                                                                    | Amp     | (Springstein <i>et al.</i> , 2019)                 |
| pTHS40             | pUT18C, P <sub>lac</sub> ::T18- <i>ftsZ</i>                                                                                                   | Amp     | (Springstein <i>et al.</i> , 2019)                 |
| pTHS41             | pKNT25, P <sub>lac</sub> :: <i>mreB-T25</i>                                                                                                   | Km, Nm  | (Springstein <i>et al.</i> , 2019)                 |
| pTHS42             | pKT25, P <sub>lac</sub> ::T25- <i>mreB</i>                                                                                                    | Km, Nm  | (Springstein <i>et al.</i> , 2019)                 |
| pTHS43             | pUT18, P <sub>lac</sub> :: <i>mreB-T18</i>                                                                                                    | Amp     | (Springstein <i>et al.</i> , 2019)                 |
| pTHS44             | pUT18C, P <sub>lac</sub> ::T18- <i>mreB</i>                                                                                                   | Amp     | (Springstein <i>et al.</i> , 2019)                 |
| pTHS60             | pIGA, P <sub>cpc560</sub> :: <i>fm7001-gfp</i> ::T <sub>rbcl</sub>                                                                            | Amp, Km | This study                                         |
| pTHS61             | pET21a(+), P <sub>T7</sub> :: <i>slr7083-his</i>                                                                                              | Amp     | This study                                         |
| pTHS62             | pET21a(+), P <sub>T7</sub> :: <i>syc2039-his</i>                                                                                              | Amp     | This study                                         |
| pTHS63             | pET21a(+), P <sub>T7</sub> :: <i>fm7001-his</i>                                                                                               | Amp     | This study                                         |



|        |                                                                     |         |            |
|--------|---------------------------------------------------------------------|---------|------------|
| pTHS64 | pET21a(+), P <sub>T7</sub> :: <i>all4981-his</i>                    | Amp     | This study |
| pTHS65 | pET21a(+), P <sub>T7</sub> :: <i>slr1301-his</i>                    | Amp     | This study |
| pTHS66 | pET21a(+), P <sub>T7</sub> :: <i>syc1139-his</i>                    | Amp     | This study |
| pTHS67 | pET21a(+); P <sub>T7</sub> :: <i>slr1301-gfp</i>                    | Amp     | This study |
| pTHS68 | pET21a(+), P <sub>T7</sub> :: <i>syc1139-gfp</i>                    | Amp     | This study |
| pTHS69 | pET21a(+), P <sub>T7</sub> :: <i>slr7083-gfp</i>                    | Amp     | This study |
| pTHS70 | pET21a(+), P <sub>T7</sub> :: <i>fm7001-gfp</i>                     | Amp     | This study |
| pTHS71 | pET21a(+), P <sub>T7</sub> :: <i>syc2039-gfp</i>                    | Amp     | This study |
| pTHS72 | pET21a(+), P <sub>T7</sub> :: <i>all4981-gfp</i>                    | Amp     | This study |
| pTHS73 | pMAL-c2x; P <sub>tac</sub> :: <i>mbp-fm7001-his</i>                 | Amp     | This study |
| pTHS74 | pAM2991, P <sub>trc</sub> :: <i>syc1139-gfp</i>                     | Sm, Sp  | This study |
| pTHS75 | pAM2991, P <sub>trc</sub> :: <i>syc2039-gfp-his</i>                 | Sm, Sp  | This study |
| pTHS76 | pIGA, P <sub>cpc560</sub> :: <i>yfp-fm7001</i> ::T <sub>rbcl</sub>  | Amp, Km | This study |
| pTHS77 | pIGA, P <sub>cpc560</sub> :: <i>slr7083-gfp</i> ::T <sub>rbcl</sub> | Amp, Km | This study |
| pTHS78 | pIGA, P <sub>cpc560</sub> :: <i>yfp-all4981</i> ::T <sub>rbcl</sub> | Amp, Km | This study |
| pTHS79 | pIGA, P <sub>cpc560</sub> :: <i>all4981-gfp</i> ::T <sub>rbcl</sub> | Amp, Km | This study |
| pTHS80 | pIGA, P <sub>cpc560</sub> :: <i>syc2039-gfp</i> ::T <sub>rbcl</sub> | Amp, Km | This study |
| pTHS81 | pIGA, P <sub>cpc560</sub> :: <i>syc1139-gfp</i> ::T <sub>rbcl</sub> | Amp, Km | This study |
| pTHS82 | pRL153, P <sub>trc</sub> :: <i>slr1301-yfp</i>                      | Km, Nm  | This study |
| pTHS83 | pRL25C, P <sub>petE</sub> :: <i>fm7001-gfp</i>                      | Km, Nm  | This study |
| pTHS84 | pRL25C, P <sub>petE</sub> :: <i>yfp-fm7001</i>                      | Km, Nm  | This study |
| pTHS85 | pRL25C, P <sub>petE</sub> :: <i>yfp-sl7083</i>                      | Km, Nm  | This study |
| pTHS86 | pRL25C, P <sub>petE</sub> :: <i>slr7083-gfp</i>                     | Km, Nm  | This study |
| pTHS87 | pRL25C, P <sub>petE</sub> :: <i>syc2039-gfp</i>                     | Km, Nm  | This study |
| pTHS88 | pRL25C, P <sub>petE</sub> :: <i>yfp-all4981</i>                     | Km, Nm  | This study |
| pTHS89 | pRL25C, P <sub>petE</sub> :: <i>all4981-gfp</i>                     | Km, Nm  | This study |
| pTHS90 | pRL25C, P <sub>petE</sub> - <i>creS-gfp</i>                         | Km, Nm  | This study |
| pTHS91 | pRL25C, P <sub>petE</sub> :: <i>slr1303-gfp</i>                     | Km, Nm  | This study |
| pTHS92 | pRL25C, P <sub>petE</sub> :: <i>yfp-sl7083</i>                      | Km, Nm  | This study |
| pTHS93 | pRL25C, P <sub>petE</sub> :: <i>syc1139-gf</i>                      | Km, Nm  | This study |
| pTHS94 | pRL25C, P <sub>all4982</sub> :: <i>all4982-ecfp</i>                 | Km, Nm  | This study |
| pTHS95 | pKNT25, P <sub>lac</sub> :: <i>fm7001-T25</i>                       | Km, Nm  | This study |

|         |                                                                                                                                       |        |            |
|---------|---------------------------------------------------------------------------------------------------------------------------------------|--------|------------|
| pTHS96  | pKT25, P <sub>lac</sub> :: <i>T25-fm7001</i>                                                                                          | Km, Nm | This study |
| pTHS97  | pUT18, P <sub>lac</sub> :: <i>fm7001-T18</i>                                                                                          | Amp    | This study |
| pTHS98  | pUT18C, P <sub>lac</sub> :: <i>T18-fm7001</i>                                                                                         | Amp    | This study |
| pTHS99  | pKNT25, P <sub>lac</sub> :: <i>slr7083-T25</i>                                                                                        | Km, Nm | This study |
| pTHS100 | pKT25, P <sub>lac</sub> :: <i>T25-slr7083</i>                                                                                         | Km, Nm | This study |
| pTHS101 | pUT18, P <sub>lac</sub> :: <i>slr7083-T18</i>                                                                                         | Amp    | This study |
| pTHS102 | pUT18C, P <sub>lac</sub> :: <i>T18-slr7083</i>                                                                                        | Amp    | This study |
| pTHS103 | pKNT25, P <sub>lac</sub> :: <i>syc2039-T25</i>                                                                                        | Km, Nm | This study |
| pTHS104 | pKT25, P <sub>lac</sub> :: <i>T25-syc2039</i>                                                                                         | Km, Nm | This study |
| pTHS105 | pUT18, P <sub>lac</sub> :: <i>syc2039-T18</i>                                                                                         | Amp    | This study |
| pTHS106 | pUT18C, P <sub>lac</sub> :: <i>T18-syc2039</i>                                                                                        | Amp    | This study |
| pTHS107 | pKNT25, P <sub>lac</sub> :: <i>all4981-T25</i>                                                                                        | Km, Nm | This study |
| pTHS108 | pKT25, P <sub>lac</sub> :: <i>T25-all4981</i>                                                                                         | Km, Nm | This study |
| pTHS109 | pUT18, P <sub>lac</sub> :: <i>all4981-T18</i>                                                                                         | Amp    | This study |
| pTHS110 | pUT18C, P <sub>lac</sub> :: <i>T18-all4981</i>                                                                                        | Amp    | This study |
| pTHS111 | pKNT25, P <sub>lac</sub> :: <i>slr1301-T25</i>                                                                                        | Km, Nm | This study |
| pTHS112 | pKT25, P <sub>lac</sub> :: <i>T25-slr1301</i>                                                                                         | Km, Nm | This study |
| pTHS113 | pUT18, P <sub>lac</sub> :: <i>slr1301-T18</i>                                                                                         | Amp    | This study |
| pTHS114 | pUT18C, P <sub>lac</sub> :: <i>T18-slr1301</i>                                                                                        | Amp    | This study |
| pTHS115 | pKNT25, P <sub>lac</sub> :: <i>syc1139-T25</i>                                                                                        | Km, Nm | This study |
| pTHS116 | pKT25, P <sub>lac</sub> :: <i>T25-syc1139</i>                                                                                         | Km, Nm | This study |
| pTHS117 | pUT18, P <sub>lac</sub> :: <i>syc1139-T18</i>                                                                                         | Amp    | This study |
| pTHS118 | pUT18C, P <sub>lac</sub> :: <i>T18-syc1139</i>                                                                                        | Amp    | This study |
| pTHS119 | pJET1.2/blunt with ~1000 bp upstream and downstream of <i>syc2039</i> flanking <i>nptII</i>                                           | Amp    | This study |
| pTHS120 | Circularized pUC ori with 1000 bp upstream and downstream of <i>slr7083</i> flanking <i>nptII</i> assembled by GIBSON assembly        | Km, Nm | This study |
| pTHS121 | pSL2680 with <i>fm7001</i> gRNA and homologous repair templates 1000 bp upstream and downstream of <i>fm7001</i>                      | Km, Nm | This study |
| pTHS122 | pRL25C containing <i>cpf1</i> , <i>lacZα</i> and pre-crRNA array with tandem spacer-repeat sequences from <i>Francisella novicida</i> | Km, Nm | This study |
| pTHS123 | pTHS122 with <i>fm7001</i> gRNA and homologous repair templates 1000 bp upstream and downstream of <i>fm7001</i>                      | Km, Nm | This study |

|         |                                                                                                                                |                |            |
|---------|--------------------------------------------------------------------------------------------------------------------------------|----------------|------------|
| pTHS124 | pSL2680 with <i>all4981</i> gRNA and homologous repair templates 1000 bp upstream and downstream of <i>all4981</i>             | Km, Nm         | This study |
| pTHS125 | pTHS122 with <i>all4981</i> gRNA and homologous repair templates 1000 bp upstream and downstream of <i>all4981</i>             | Km, Nm         | This study |
| pTHS126 | pRL271 containing 1000 bp upstream and downstream of <i>fm7001</i> flanking <i>nptII</i>                                       | Km, Nm, Cm     | This study |
| pTHS127 | pRL278 containing 2000 bp upstream and downstream of <i>fm7001</i> flanking CS.3                                               | Km, Nm, Sm, Sp | This study |
| pTHS128 | pRL278 containing 2000 bp upstream of <i>fm7001</i> and the first 398 bp of <i>fm7001</i>                                      | Km, Nm         | This study |
| pTHS129 | pRL278 containing 1000 bp upstream and downstream of <i>all4981</i> flanking CS.3                                              | Km, Nm, Sm, Sp | This study |
| pTHS130 | pRL278 containing 151 bp upstream of <i>all4981</i> and the first 449 bp of <i>all4981</i>                                     | Km, Nm         | This study |
| pTHS131 | pJET1.2/blunt with ~1000 bp upstream and downstream of <i>slr1303</i> flanking CS.3 inserted by GIBSON assembly                | Amp            | This study |
| pTHS132 | Circularized pUC ori with 1000 bp upstream and downstream of <i>slr1301</i> flanking <i>nptII</i> assembled by GIBSON assembly | Km, Nm         | This study |
| pTHS133 | pJET1.2/blunt with ~1000 bp upstream and downstream of <i>syc1139</i> flanking <i>nptII</i> inserted by GIBSON assembly        | Amp            | This study |

1246 Restriction sites or overlapping sites are underlined.

1247 Sm: streptomycin resistance; Sp: spectinomycin resistance; Amp: ampicillin resistance, Km: kanamycin  
 1248 resistance, Nm: neomycin resistance; Cm: chloramphenicol resistance.

- 1249
- 1250
- 1251
- 1252
- 1253
- 1) The eYFP is C-terminally followed by a myc-tag, which is then followed by a heptapeptide of glycine and serine. Abbreviated: *yfp*.
  - 2) Modified *gfpmut3.1* in which the internal NdeI site was removed by replacing CAT by the synonymous CAC codon. The GFP is N-terminally preceded by 12 alanine and serine residues. Abbreviated: *gfp*. (Stucken *et al.*, 2012).
